# Supplementary material for: Critical role of the BAF chromatin remodeling complex during murine neural crest development
Source: PubMed Central journal article supplement (PMC8016319; doi:10.1371/journal.pgen.1009446), 2021-03-22
Supplement: pgen.1009446.s011.pdf [file pgen.1009446.s011.pdf]

**Supplemental table 1. List of differentially expressed genes between control and BAF155/170 double mutant NCCs.**

| ensembl                | gene         | logFC    | AveExpr  | t        | P.Value  | adj.P.Val | B         | Control_1   | Control_2   | Control_3  | dKO_1        | dKO_2        | dKO_3         |
|------------------------|--------------|----------|----------|----------|----------|-----------|-----------|-------------|-------------|------------|--------------|--------------|---------------|
| ENSMUSG00000108741.1   | Gm44553      | -3.9227  | -1.2438  | -4.4442  | 0.000493 | 0.020558  | -0.56355  | 0.776780271 | 0.829071718 | 0.1045059  | -0.407326071 | -3.461021292 | -5.304833203  |
| ENSMUSG00000102594.1   | Gm38381      | -3.29207 | -0.27941 | -6.55207 | 9.99E-06 | 0.004774  | 1.994255  | 1.347095996 | 1.948370647 | 0.8691447  | -1.847898663 | -1.876058791 | -1.374904821  |
| ENSMUSG0000028197.4    | Col24a1      | -2.7867  | -0.90224 | -5.19167 | 0.000116 | 0.105033  | 0.334098  | 0.255948108 | 0.829071718 | 0.14184602 | -3.070291084 | -1.345544075 | -2.497478281  |
| ENSMUSG0000002266.15   | Zim1         | -2.58556 | 0.053176 | -4.8462  | 0.000224 | 0.145473  | 0.219449  | 1.404811494 | 1.585800567 | 0.8691447  | -0.262936162 | -0.798056279 | -2.497478281  |
| ENSMUSG00000026452.15  | Syt2         | -2.53487 | -0.11807 | -5.21738 | 0.00011  | 0.101497  | 0.611963  | 1.286975003 | 1.643516065 | 0.58993273 | -1.485328583 | -1.139093197 | -1.604393485  |
| ENSMUSG00000028626.5   | Col9a2       | -2.5209  | -0.72711 | -4.74575 | 0.000273 | 0.151809  | -0.18963  | 0.487273654 | 0.614946913 | 0.50504383 | -0.614946913 | -1.139093197 | -1.604393485  |
| ENSMUSG00000055235.11  | Wdr86        | -2.51388 | -0.5025  | -4.76931 | 0.00026  | 0.101528  | -0.1015   | 0.376423431 | 1.180544089 | 0.74605193 | -1.195821966 | -2.724055698 | -1.397942607  |
| ENSMUSG00000019906.14  | Lin7a        | -2.48425 | -0.19264 | -4.99116 | 0.00011  | 0.112548  | 0.299088  | 0.861669169 | 1.525679575 | 0.74605193 | -0.567790743 | -1.876058791 | -1.845401584  |
| ENSMUSG00000030554.15  | Synn         | -2.41608 | 0.20537  | -4.57428 | 0.000381 | 0.181298  | -0.08336  | 1.286975003 | 2.120837843 | 0.81201772 | 0.099633198  | -1.876058791 | -1.217370362  |
| ENSMUSG00000026147.16  | Col9a1       | -2.41201 | 0.25423  | -4.72345 | 0.000285 | 0.161299  | 0.138266  | 1.565276166 | 2.07961518  | 0.8691447  | -0.954813866 | -1.17550186  | -1.604393485  |
| ENSMUSG00000029754.13  | Dlx6         | -2.39082 | -0.45719 | -5.09089 | 0.00014  | 0.115551  | 0.304244  | 1.017788371 | 0.614946913 | 0.58993273 | -1.485328583 | -1.876058791 | -1.604393485  |
| ENSMUSG000000067276.5  | Capn6        | -2.39085 | 1.127891 | -6.49429 | 1.10E-05 | 0.004774  | 0.316836  | 2.332298994 | 2.510249534 | 1.93638314 | 0.630148634  | -0.091787482 | -0.549945701  |
| ENSMUSG00000021567.14  | Nkd2         | -2.29834 | -0.09071 | -4.53173 | 0.000414 | 0.181974  | -0.25778  | 0.376423431 | 1.585800567 | 1.18857017 | -1.195821966 | -0.65366637  | -1.845401584  |
| ENSMUSG00000098973.1   | Mir6236      | -2.26927 | 12.41283 | -4.06675 | 0.001046 | 0.03013   | -0.88472  | 13.44637    | 13.92300716 | 13.2765145 | 10.924975554 | 13.16635584  | 9.739774368   |
| ENSMUSG00000086503.3   | Xist         | -2.26411 | 6.980508 | -5.18987 | 0.001116 | 0.105033  | 1.177974  | 7.831405143 | 8.336592991 | 8.17253174 | 5.001171279  | 7.416771729  | 5.124573539   |
| ENSMUSG00000074818.12  | Pdzd7        | -2.22033 | -0.83396 | -4.43343 | 0.000503 | 0.206653  | -0.62636  | 0.255948108 | 0.94662679  | 0.1045059  | -1.485328583 | -2.238628871 | -2.134908201  |
| ENSMUSG000000104315.1  | Gm37906      | -2.18914 | -0.60648 | -3.15633 | 0.006638 | 0.05817   | -3.23663  | 0.124703574 | 0.829071718 | 0.14184602 | -1.195821966 | -0.091787482 | -3.19870702   |
| ENSMUSG00000047793.13  | Sned1        | -2.16537 | 0.811676 | -6.40112 | 1.29E-05 | 0.005109  | 2.707325  | 1.999172692 | 2.037179913 | 1.689468   | -0.407326071 | -0.188002798 | -0.260439084  |
| ENSMUSG00000033676.13  | Gabbr3       | -2.16005 | -0.26787 | -4.78875 | 0.000251 | 0.151223  | 0.018307  | 0.941839517 | 0.829071718 | 0.67103038 | -1.485328583 | -0.958520951 | -1.604393485  |
| ENSMUSG00000030074.9   | Gykt2        | -2.14555 | -0.43596 | -3.48733 | 0.003385 | 0.057354  | -1.82479  | 0.487273654 | 1.015484842 | 0.31863071 | 0.298942726  | -2.238628871 | -2.497478281  |
| ENSMUSG00000043496.7   | Tril1        | -2.14122 | 1.785544 | -5.23594 | 0.000106 | 0.104844  | -1.422956 | 2.765809153 | 3.664577681 | 2.14715024 | 1.227389665  | 0.786902822  | 0.121435152   |
| ENSMUSG000000105624.1  | Gm43187      | -2.1269  | -0.21527 | -4.46059 | 0.000477 | 0.20447   | -0.39478  | 0.376423431 | 1.015484842 | 1.07535956 | -0.954813866 | -0.958520951 | -1.845401584  |
| ENSMUSG000000087943.1  | Gm24245      | -2.11013 | 5.879888 | -3.95751 | 0.01304  | 0.33264   | -1.239    | 6.76512068  | 7.293582261 | 6.73619227 | 4.402738138  | 6.717643559  | 3.364051781   |
| ENSMUSG00000057716.6   | Tmem178b     | -2.07554 | 0.702099 | -4.93418 | 0.000189 | 0.131297  | 0.649276  | 1.460306606 | 2.478885363 | 1.34329276 | -0.11397395  | -0.798056279 | -0.260439084  |
| ENSMUSG00000030757.13  | Zkscan2      | -2.06979 | 1.038779 | -6.04461 | 2.42E-05 | 0.006757  | 2.359893  | 2.0361669   | 1.948370647 | 1.21886119 | 0.77101117   | -0.29109629  | -0.350636892  |
| ENSMUSG00000030500.5   | Slc17a6      | -2.04028 | 0.754148 | -4.63169 | 0.000341 | 0.171922  | 0.207435  | 1.999172692 | 2.237877264 | 1.18857017 | -0.11397395  | -1.139093197 | 0.249755649   |
| ENSMUSG00000017692.8   | Rhhld3       | -2.02177 | 0.999562 | -5.31131 | 9.24E-05 | 0.01      | 1.329489  | 2.208119583 | 2.310940726 | 1.48301752 | 0.360148634  | -0.188002798 | -0.463052208  |
| ENSMUSG00000031837.13  | Necab2       | -2.01018 | -0.20499 | -4.06516 | 0.00105  | 0.030161  | -0.94312  | 0.776780271 | 1.015484842 | 0.74605193 | -2.33325649  | -0.522421837 | -0.91251578   |
| ENSMUSG000000105985.1  | Gm42993      | -2.00761 | 1.301332 | -5.56373 | 5.78E-05 | 0.008819  | 1.81878   | 2.171252968 | 2.712557709 | 1.99980852 | 1.072662687  | -0.02127603  | 0.249755649   |
| ENSMUSG00000000301.15  | H19          | -2.00431 | 4.50662  | -7.52259 | 2.03E-06 | 0.00403   | 5.27057   | 5.547769448 | 6.169535764 | 4.81158839 | 3.766811182  | 3.225479235  | 3.51854307    |
| ENSMUSG00000040310.12  | Alix4        | -2.00336 | 1.611952 | -5.28042 | 9.79E-05 | 0.102626  | 1.462897  | 2.0361669   | 3.47093661  | 2.426434   | 0.554199782  | 0.380280962  | 0.803691254   |
| ENSMUSG00000099746.1   | Ppnr         | -1.99782 | -0.55854 | -3.82686 | 0.001698 | 0.038362  | -1.37055  | 0.590367147 | 0.494652679 | 0.21553721 | -0.567790743 | -2.238628871 | -1.845401584  |
| ENSMUSG000000102657.1  | Gm37899      | -1.99768 | 1.047763 | -4.68209 | 0.003009 | 0.17041   | 0.37026   | 2.141777088 | 2.414034219 | 1.5267389  | 1.1776364    | -0.798056279 | -1.17550186   |
| ENSMUSG00000042961.13  | Egflam       | -1.97579 | 0.509333 | -3.8764  | 0.001536 | 0.062823  | -1.03935  | 1.565276166 | 2.380481659 | 0.58993273 | 0.099633198  | -0.522421837 | -0.1056905689 |
| ENSMUSG00000052854.15  | Nrk          | -1.97469 | 0.449124 | -4.7918  | 0.000249 | 0.151202  | 0.351382  | 1.224239248 | 1.948370647 | 1.13307505 | -0.262936162 | -0.29109629  | -1.056905689  |
| ENSMUSG00000059049.14  | Freml1       | -1.9641  | 2.371988 | -7.96146 | 1.03E-06 | 0.002902  | 5.614134  | 3.3325296   | 3.502472184 | 2.9604956  | 1.453270872  | 1.329055639  | 1.35337682    |
| ENSMUSG000000102428.1  | Pcdhga12     | -1.95499 | 0.518525 | -4.12854 | 0.000924 | 0.282659  | -0.63502  | 2.072236155 | 1.643516065 | 0.74605193 | 0.389140535  | -0.958520951 | -0.781217247  |
| ENSMUSG00000049038.2   | Mterf2       | -1.94767 | 0.035259 | -4.42268 | 0.000514 | 0.202905  | -0.34048  | 1.374095996 | 1.10037374  | 0.58993273 | -0.567790743 | -1.345544075 | -0.91251578   |
| ENSMUSG00000026674.9   | Ddr2         | -1.947   | 2.308156 | -7.73053 | 1.47E-06 | 0.002902  | 5.287844  | 3.425873109 | 3.533333147 | 2.89527794 | 1.494493535  | 1.429749638  | 1.027062268   |
| ENSMUSG00000035305.5   | Ror1         | -1.94259 | 0.101093 | -3.86655 | 0.001567 | 0.0366    | -1.14181  | 0.776780271 | 1.993458536 | 0.50504383 | -0.748632989 | -0.522421837 | -1.397942607  |
| ENSMUSG00000029778.12  | Adcyap11     | -1.93204 | 0.999274 | -4.87788 | 0.000211 | 0.141411  | 0.670819  | 1.663123489 | 2.65759125  | 1.56917417 | 0.554199782  | -0.100189673 | -0.446852208  |
| ENSMUSG000000062961.6  | Ccdc177      | -1.93165 | 0.234899 | -4.69446 | 0.000301 | 0.161984  | 0.128917  | 1.017788371 | 1.256492942 | 1.29353973 | -0.262936162 | -1.345544075 | -0.549945701  |
| ENSMUSG000000106022.1  | Gm42929      | -1.92554 | 0.105411 | -3.70693 | 0.002166 | 0.043866  | -1.38227  | 1.460306606 | 1.397355478 | 0.31863071 | -0.407326071 | -0.29109629  | -1.845401584  |
| ENSMUSG00000030020.13  | Priclike2    | -1.91835 | 0.787717 | -4.86821 | 0.000215 | 0.141411  | 0.519865  | 1.513745865 | 2.199909414 | 1.48301752 | 0.630148634  | -0.65366637  | -0.446852208  |
| ENSMUSG000000102516.1  | Gm38340      | -1.91518 | -0.33107 | -4.03481 | 0.001116 | 0.039999  | -1.01712  | 0.487273654 | 0.614946913 | 0.67103038 | -0.567790743 | -1.345544075 | -1.845401584  |
| ENSMUSG00000021301.8   | Hecw1        | -1.90796 | 0.530379 | -4.93618 | 0.000189 | 0.131297  | 0.596215  | 1.754753965 | 1.397355478 | 1.34329276 | -0.407326071 | -0.958520951 | -0.852711802  |
| ENSMUSG00000025867.8   | Cplx2        | -1.9077  | 1.596546 | -6.50505 | 1.08E-05 | 0.007674  | 3.314993  | 2.851327224 | 2.346130154 | 2.37951295 | 1.126106129  | 0.508605059  | 0.367592139   |
| ENSMUSG000000066113.15 | Adams11      | -1.90251 | -0.21786 | -3.23074 | 0.005707 | 0.078674  | -2.16254  | 0.376423431 | 1.180544089 | 0.58993273 | -1.195821966 | 0.239418426  | -2.497478281  |
| ENSMUSG00000004110.14  | Cacna1e      | -1.89826 | 0.900766 | -7.73033 | 0.002065 | 0.042506  | -1.22451  | 2.446631669 | 2.478885363 | 0.74605193 | -0.131691229 | 0.311568212  | -0.446852208  |
| ENSMUSG00000078190.6   | Dnm3os       | -1.8916  | 2.25104  | -7.82317 | 1.27E-06 | 0.002902  | 5.380798  | 3.008510557 | 3.150999813 | 3.2871982  | 1.754137352  | 0.884753545  | 1.265022045   |
| ENSMUSG00000010066.15  | Cacna2d2     | -1.89097 | 1.140336 | -5.49375 | 6.58E-05 | 0.009194  | 1.658808  | 1.922107111 | 2.629302206 | 1.76443006 | 0.099633198  | 0.448689304  | -0.019430984  |
| ENSMUSG00000044576.6   | Garem2       | -1.8828  | -0.18172 | -3.3517  | 0.004614 | 0.06951   | -2.00371  | 0.686582462 | 1.585800567 | 0.21553721 | -2.33325649  | -0.188002798 | -0.1056905689 |
| ENSMUSG00000108394.1   | Gm45477      | -1.87323 | -0.17155 | -4.05137 | 0.001079 | 0.030547  | -0.9416   | 0.686582462 | 1.180544089 | 0.41484602 | -0.748632989 | -0.958520951 | -1.604393485  |
| ENSMUSG00000017229.1   | Zr70078F05R1 | -1.87074 | 0.281979 | -4.33946 | 0.000606 | 0.022923  | -0.37235  | 0.686582462 | 1.643516065 | 1.29353973 | -0.131691229 | -1.139093197 | -0.660977013  |
| ENSMUSG000000041379.15 | Coro2b       | -1.85803 | 0.569644 | -3.32954 | 0.004668 | 0.070051  | -1.91839  | 0.776780271 | 2.65759125  | 1.01523856 | 0.554199782  | -0.188002798 | -1.397942607  |
| ENSMUSG00000047757.16  | Fancb        | -1.85349 | -0.60421 | -3.02589 | 0.008649 | 0.098298  | -2.512    | 0.124703574 | 0.494652679 | 0.21553721 | -0.131691229 | -1.345544075 | -0.928290518  |
| ENSMUSG00000027820.12  | Mme          | -1.85332 | 0.908681 | -5.45477 | 7.07E-05 | 0.009244  | 1.510379  | 1.961204842 | 2.07961518  | 1.5267389  | -0.011397395 | -0.29109629  | -0.810719893  |
| ENSMUSG00000023236.7   | Scg5         | -1.84908 | -0.11986 | -3.88658 | 0.001505 | 0.035994  | -1.16434  | 0.686582462 | 1.015484842 | 0.67103038 | -0.954813866 | -0.29109629  | -1.845401584  |
| ENSMUSG00000025478.13  | Dpysl4       | -1.84622 | 3.288136 | -5.91275 | 3.06E-05 | 0.007194  | 2.673527  | 4.244138805 | 4.904781378 | 3.35211207 | 2.76259893   | 1.896530713  | 2.38653575    |
| ENSMUSG00000004328.15  | Hif3a        | -1.84293 | 0.013741 | -3.46039 |          |           |           |             |             |            |              |              |               |

|                        |             |          |          |          |          |          |           |             |             |             |              |              |               |
|------------------------|-------------|----------|----------|----------|----------|----------|-----------|-------------|-------------|-------------|--------------|--------------|---------------|
| ENSMUSG00000104184.1   | Gm37818     | -1.65258 | -0.39707 | -2.76815 | 0.014534 | 0.132596 | -2.86333  | 0.376242341 | 0.925287033 | -0.14703287 | 0.099633918  | -1.139093197 | -2.497478281  |
| ENSMUSG00000039239.5   | Tgfb2       | -1.6519  | 0.737813 | -4.31292 | 0.006639 | 0.023239 | -0.28316  | 0.107788371 | 2.07961518  | 1.56917417  | 0.298942726  | -0.18802798  | -0.350636892  |
| ENSMUSG00000039037.5   | St6galnac5  | -1.65181 | -0.58527 | -3.06803 | 0.007941 | 0.094053 | -2.44939  | 0.255948108 | 0.494652679 | 0.1045059   | -2.33332549  | -1.586552174 | -0.446852208  |
| ENSMUSG00000000567.5   | Sox9        | -1.65113 | 1.889978 | -5.07985 | 0.00143  | 0.011551 | -1.9162   | 2.721070838 | 3.247215128 | 2.17489523  | 1.410835606  | 1.257796596  | -0.528056811  |
| ENSMUSG00000070880.0   | Gad1        | -1.64834 | 0.375229 | -3.97418 | 0.001261 | 0.032787 | -0.90098  | 1.224329248 | 1.015484842 | 1.24200942  | -0.011397305 | -0.011589673 | -1.217037062  |
| ENSMUSG00000061080.1   | Lsmp        | -1.64818 | 0.347967 | -2.72999 | 0.015687 | 0.138972 | -2.89591  | 0.992036717 | 1.948370647 | 0.81820172  | 0.70229842   | 0.163469573  | -1.234908201  |
| ENSMUSG00000021097.4   | Clmn        | -1.64436 | 1.188995 | -4.33351 | 0.006614 | 0.022937 | -0.16551  | 1.922110711 | 2.27487171  | 1.76443046  | 0.70229842   | 0.10205398   | -0.549945701  |
| ENSMUSG00000015222.17  | Map2        | -1.63585 | 4.72261  | -7.7095  | 1.51E+06 | 0.002902 | 5.486266  | 5.277350584 | 6.086134373 | 5.24036907  | 4.301848457  | 3.57240171   | 3.87558126    |
| ENSMUSG00000034682.12  | Sema3f      | -1.63493 | 1.632608 | -4.24014 | 0.00739  | 0.025003 | -0.28662  | 3.20224176  | 3.265711472 | 1.80049971  | 1.453270872  | 0.445869304  | 0.58056811    |
| ENSMUSG00000020926.16  | Adam11      | -1.62902 | 1.3337   | -4.57457 | 0.000381 | 0.018298 | 0.260085  | 2.240180792 | 2.765506589 | 1.5267389   | 0.630148634  | 0.311568212  | 0.52805811    |
| ENSMUSG00000025555.14  | Farp1       | -1.62799 | 2.994904 | -6.49381 | 1.10E+05 | 0.004774 | 3.638647  | 3.726739589 | 4.306481078 | 3.38546221  | 2.602132528  | 1.13887544   | 1.83478115    |
| ENSMUSG00000003665.6   | Has1        | -1.6265  | -0.31593 | -2.80439 | 0.013516 | 0.126608 | -2.80463  | 0.376242341 | 0.614946913 | 0.50504383  | -0.407326071 | -2.724055698 | -0.260439084  |
| ENSMUSG000000107353.1  | 4930430022R | -1.62531 | -0.59155 | -1.13451 | 0.006939 | 0.087573 | -2.35491  | 0.255948108 | 0.219018236 | 0.1045059   | -0.407326071 | -1.876058791 | -1.845401584  |
| ENSMUSG000000058297.16 | Spock2      | -1.62207 | 1.673571 | -2.97215 | 0.009642 | 0.104125 | -2.57105  | 2.892257488 | 3.63642664  | 1.07535956  | 1.07266687   | 0.836659257  | 0.528056811   |
| ENSMUSG000000024593.15 | Megf10      | -1.62093 | 1.83035  | -5.07534 | 0.001444 | 0.011551 | -1.7794   | 2.765809153 | 2.913605228 | 2.17489523  | 1.684596418  | 1.020105398  | 0.423087252   |
| ENSMUSG000000030000.0  | Add2        | -1.62    | 2.35585  | -5.76116 | 4.03E+05 | 0.008063 | 2.387444  | 2.932058497 | 3.758993282 | 2.82697193  | 1.944659258  | 1.182834898  | 1.489582663   |
| ENSMUSG000000031285.14 | Dcx         | -1.61962 | 4.2606   | -6.48765 | 1.12E+05 | 0.004774 | 3.598675  | 4.763053288 | 5.704106045 | 4.79380506  | 3.529621758  | 2.925559761  | 3.847451639   |
| ENSMUSG000000050822.11 | Sic29a4     | -1.61479 | 0.314266 | -3.50268 | 0.003281 | 0.056198 | -1.6619   | 1.404811494 | 1.643516065 | 0.41484602  | -0.262936162 | -1.139093197 | -0.17550186   |
| ENSMUSG00000027684.16  | Mecom       | -1.61369 | 1.88415  | -4.66306 | 0.00032  | 0.017543 | 0.472881  | 3.008510557 | 2.446824154 | 2.4493344   | 2.190236466  | 0.681936662  | 0.528056811   |
| ENSMUSG000000107023.2  | Gm42715     | -1.61363 | -0.4647  | -3.10256 | 0.007404 | 0.090375 | -2.3839   | 0.124703574 | 0.725978225 | 0.1045059   | -0.262936162 | -1.876058791 | -1.604393485  |
| ENSMUSG00000018698.15  | Lhx1        | -1.61108 | 1.845227 | -5.3232  | 9.04E+05 | 0.009985 | 1.591942  | 2.787668587 | 3.150999813 | 2.11886119  | 0.899335267  | 0.97368402   | 1.138110293   |
| ENSMUSG00000003763.14  | Mts11       | -1.60938 | 1.893357 | -4.06299 | 0.01054  | 0.030224 | -0.60195  | 2.500570476 | 3.53333147  | 0.2050532   | 1.852541566  | 1.020105398  | 0.423087252   |
| ENSMUSG00000079330.8   | Lemd1       | -1.60929 | 0.741357 | -4.80145 | 0.00245  | 0.015126 | 0.486106  | 1.709666075 | 1.462943819 | 1.43792963  | 0.099633918  | -0.001589673 | -0.260439084  |
| ENSMUSG00000073867.2   | AA474408    | -1.60796 | -0.59438 | -3.31623 | 0.004796 | 0.071188 | -2.0959   | 2.55948108  | 0.219018236 | 0.1045059   | -0.95481386  | -1.345544075 | -1.845401584  |
| ENSMUSG00000021464.14  | Ror2        | -1.60702 | 1.277451 | -4.91779 | 0.00195  | 0.013581 | 0.817347  | 2.072236155 | 2.540946331 | 1.65047427  | 0.77101117   | 0.380280962  | 0.249755649   |
| ENSMUSG000000039154.6  | A530064N14R | -1.60493 | 0.283572 | -4.01745 | 0.001155 | 0.03138  | -8.85505  | 0.776780271 | 1.328642728 | 1.13307505  | -0.131691629 | -0.95820951  | -0.446852208  |
| ENSMUSG000000025738.7  | Fbxl16      | -1.59748 | 0.689352 | -4.57545 | 0.00038  | 0.018298 | 0.101942  | 1.513745865 | 1.585800567 | 1.34329276  | -0.131691629 | 0.239418426  | -0.446852208  |
| ENSMUSG000000020105.8  | Urg3        | -1.59671 | 2.252761 | -4.5631  | 0.00039  | 0.018542 | 0.330085  | 3.150238667 | 3.47093661  | 2.4493344   | 2.42156202   | 1.220802774  | 0.803691254   |
| ENSMUSG00000089525.2   | Rt1         | -1.59009 | 0.971681 | -3.14847 | 0.006745 | 0.086205 | -2.2121   | 1.961204842 | 2.510249534 | 0.81820172  | 0.77101117   | 0.681936662  | -0.91251578   |
| ENSMUSG000000039154.6  | Shd         | -1.58845 | 0.241898 | -4.02103 | 0.001147 | 0.03138  | -8.85505  | 0.861669169 | 0.925287033 | 0.21200942  | -0.262936162 | -0.102127603 | -0.91251578   |
| ENSMUSG000000103427.1  | Gm37534     | -1.58605 | 1.405212 | -4.45781 | 0.00048  | 0.020447 | 0.075843  | 2.271544963 | 2.07961518  | 1.09000633  | 1.719785847  | 0.083299224  | 0.17019893    |
| ENSMUSG000000021611.8  | Tert        | -1.58032 | 0.776787 | -4.18413 | 0.000827 | 0.026928 | -0.48129  | 1.709666075 | 1.585800567 | 1.34329276  | 0.77101117   | -0.65366627  | -0.095379867  |
| ENSMUSG00000046580.10  | Gm7862      | -1.57986 | 0.25289  | -3.65642 | 0.0024   | 0.046328 | -1.42513  | 1.158650906 | 0.829071718 | 1.07535956  | -0.567790743 | 0.239418426  | -1.217370362  |
| ENSMUSG000000021700.9  | Rab3c       | -1.57674 | 1.452747 | -5.07496 | 0.001445 | 0.011551 | -1.11618  | 2.446631669 | 2.571003565 | 1.76443046  | 0.77101117   | 0.445869304  | 0.17753461    |
| ENSMUSG000000037568.12 | Vash2       | -1.57494 | 1.788217 | -6.03685 | 2.45E+05 | 0.006757 | 2.715758  | 2.473853138 | 2.913605228 | 2.35546747  | 1.17763643   | 0.884753545  | 0.923998488   |
| ENSMUSG000000089827.1  | 1700023H06R | -1.57274 | 0.097371 | -3.38503 | 0.004169 | 0.065001 | -1.8775   | 0.776780271 | 1.525679575 | 0.50504383  | -1.485328583 | -0.188002798 | -0.549945701  |
| ENSMUSG000000027692.16 | Trnk        | -1.57218 | 2.463261 | -4.65464 | 0.000326 | 0.01769  | 0.460873  | 3.081114306 | 3.84760767  | 2.79156659  | 2.002957898  | 2.21140405   | 0.849413917   |
| ENSMUSG000000034701.9  | Neurod1     | -1.57152 | 0.643368 | -2.91104 | 0.010907 | 0.111478 | -2.60632  | 3.347095996 | 2.571003565 | 0.50504383  | 0.389140535  | -1.139093197 | 0.187019893   |
| ENSMUSG000000038677.13 | Scub3       | -1.57095 | 2.596921 | -5.22556 | 0.00109  | 0.010424 | -1.484266 | 1.669024091 | 3.835276868 | 2.67981823  | 2.058991933  | 1.848833971  | 1.80582663    |
| ENSMUSG00000042436.12  | Mfap4       | -1.56609 | 1.466078 | -4.5527  | 0.000398 | 0.018566 | 0.243204  | 1.961204842 | 3.004513725 | 1.83568914  | 0.836599512  | 0.681936662  | 0.476526511   |
| ENSMUSG000000032492.14 | Pth1r       | -1.56209 | 0.82193  | -4.46133 | 0.000476 | 0.020447 | -0.02396  | 1.124703574 | 1.91828061  | 1.39138705  | 0.474029432  | -0.102127603 | 0.052718802   |
| ENSMUSG00000005397.7   | Nid1        | -1.56109 | 2.453977 | -4.98948 | 0.00017  | 0.012548 | 1.065628  | 3.045269107 | 4.053239764 | 2.67981823  | 1.787689911  | 1.668261275  | 1.85982663    |
| ENSMUSG000000103937.1  | Gm37186     | -1.56075 | -0.31626 | -3.38552 | 0.004165 | 0.065001 | -1.9446   | 0.124703574 | 0.829071718 | 0.50504383  | -1.485328583 | -1.958544075 | -0.91251578   |
| ENSMUSG000000034958.11 | Atcay       | -1.56074 | 0.473129 | -3.8226  | 0.001713 | 0.038564 | -1.12221  | 1.709666075 | 1.80544089  | 0.81820172  | 0.202727411  | -0.29109629  | -0.781271247  |
| ENSMUSG000000020297.1  | Nsg2        | -1.56051 | 1.696375 | -4.37833 | 0.005611 | 0.021658 | -0.03915  | 1.798475342 | 3.319818877 | 2.3546747   | 1.07266687   | 0.786906139  | 0.84913917    |
| ENSMUSG00000048015.3   | Neurod4     | -1.55911 | 0.74112  | -3.46357 | 0.003553 | 0.058821 | -1.68201  | 1.089938156 | 2.346130154 | 1.13307505  | 0.77101117   | -0.798056279 | -0.095379837  |
| ENSMUSG00000097042.1   | Gm17491     | -1.55883 | -0.03698 | -3.48576 | 0.003396 | 0.057392 | -1.74015  | 0.776780271 | 0.36340486  | 0.195250281 | -0.262936162 | -0.65366627  | -1.397942607  |
| ENSMUSG00000027932.14  | Sic27a3     | -1.55835 | 0.61141  | -4.1695  | 0.000851 | 0.029783 | -0.53883  | 1.286975003 | 1.328642728 | 1.5267389   | 0.202727411  | -0.798056279 | -0.12143552   |
| ENSMUSG000000021057.15 | Akap5       | -1.5566  | -0.04988 | -3.0601  | 0.008001 | 0.049339 | -2.39621  | 1.158650906 | 0.725978225 | 0.21553721  | -0.262936162 | -0.29109629  | -1.845401584  |
| ENSMUSG00000098090.7   | 2700099C18R | -1.55547 | 0.107515 | -3.53088 | 0.003098 | 0.054188 | -1.64589  | 0.861669169 | 0.61496913  | 1.07535956  | 0.099633918  | -1.345544075 | -0.660977013  |
| ENSMUSG000000028073.15 | Pear1       | -1.55483 | -0.38033 | -3.03676 | 0.00846  | 0.097312 | -2.46742  | 0.376242341 | 0.36340486  | 0.31863071  | -0.407326071 | -0.798056279 | -1.2134908201 |
| ENSMUSG000000065820.1  | Gm26316     | -1.55463 | -0.0702  | -2.94178 | 0.010251 | 0.107825 | -2.58006  | 0.861669169 | 1.25642942  | 0.1045059   | -1.485328583 | 0.239418426  | -1.397942607  |
| ENSMUSG000000104344.1  | Gm38077     | -1.55214 | 0.044    | -2.83853 | 0.012621 | 0.122107 | -2.7352   | 1.017788371 | 0.829071718 | 0.21553721  | 0.099633918  | -0.29109629  | -1.2134908201 |
| ENSMUSG00000022055.7   | Nefl        | -1.54515 | 1.742782 | -4.27282 | 0.000692 | 0.024199 | -0.22409  | 2.418886679 | 3.209495462 | 1.90359321  | 1.611532956  | 0.836659257  | 0.476526511   |
| ENSMUSG000000067786.16 | Nnat        | -1.54451 | 3.927313 | -5.9677  | 2.77E+05 | 0.006901 | 2.724947  | 4.708600741 | 5.361259679 | 4.06427606  | 3.233489664  | 3.298312115  | 2.899737941   |
| ENSMUSG000000079470.8  | Utp14b      | -1.543   | 2.136419 | -6.01958 | 2.53E+05 | 0.006787 | 2.775832  | 2.78668587  | 3.090031796 | 2.77353267  | 1.852541056  | 1.429749638  | 0.884991356   |
| ENSMUSG000000034543.7  | Adams15     | -1.53671 | 0.398352 | -3.17828 | 0.006349 | 0.083118 | -1.17521  | 0.686582462 | 2.120837843 | 0.81820172  | -0.95481386  | 0.380280962  | -0.660977013  |
| ENSMUSG000000045871.1  | Slit3c      | -1.53179 | 0.612974 | -3.07265 | 0.007867 | 0.093671 | -2.33936  | 1.224329248 | 1.901828061 | 0.86941447  | 0.899335267  | 0.163469573  | -1.397942607  |
| ENSMUSG000000032796.7  | Lama1       | -1.52996 | 2.444625 | -4.41933 | 0.000518 | 0.020975 | 0.029353  | 2.892257488 | 4.105517043 | 2.71803755  | 1.494493535  | 2.192420947  | 1.265022443   |
| ENSMUSG000000049929.7  | Lpar4       | -1.5298  | 0.383775 | -3.18796 | 0.006225 | 0.028384 | -2.15987  | 1.286975003 | 1.397355748 | 0.74605193  | 0.554199781  | 1.586552174  | 1.065529807   |
| ENSMUSG00000044288.6   | Cnr1        | -1.52955 | 0.527416 | -3.800   |          |          |           |             |             |             |              |              |               |

|                        |          |          |          |          |          |          |          |             |             |             |              |              |              |
|------------------------|----------|----------|----------|----------|----------|----------|----------|-------------|-------------|-------------|--------------|--------------|--------------|
| ENSMUSG00000044681.18  | Cnp1     | -1.46205 | 0.783069 | -3.78858 | 0.001835 | 0.040041 | -1.13199 | 1.224239248 | 1.643516065 | 1.56917417  | 0.95945626   | -0.522421837 | -0.175550186 |
| ENSMUSG00000052217.5   | Hbb-bh1  | -1.46187 | 0.957101 | -2.62554 | 0.019312 | 0.154133 | -0.09572 | 1.882133271 | 2.765506589 | 0.58993273  | 0.70229842   | -0.958520951 | 0.761255988  |
| ENSMUSG00000029126.7   | Nsg1     | -1.46185 | 1.353907 | -4.25015 | 0.000725 | 0.250208 | -0.28745 | 1.709666075 | 2.816580774 | 1.83568914  | 0.298942726  | 0.286659257  | 0.625904135  |
| ENSMUSG000000104292.1  | Gm38042  | -1.45874 | 1.019013 | -4.57988 | 0.000377 | 0.018298 | 0.215013 | 1.404811494 | 1.948370647 | 1.87004065  | 0.389140535  | 0.382080962  | 0.121431552  |
| ENSMUSG00000075316.11  | Scn9a    | -1.45858 | -0.18767 | -2.41343 | 0.029305 | 0.185875 | -3.72229 | 1.347095996 | 0.829071718 | -0.45188745 | -1.485328583 | 0.239418426  | -1.604393485 |
| ENSMUSG00000032816.14  | Igdcc4   | -1.45839 | 1.999334 | -5.37727 | 0.17E+05 | 0.009818 | 1.708802 | 2.562703915 | 3.150999813 | 2.426434    | 1.611532956  | 0.884753545  | 1.295079639  |
| ENSMUSG00000025964.15  | Adam23   | -1.45807 | 1.505275 | -3.79778 | 0.018001 | 0.396688 | -1.07605 | 2.141777088 | 2.685336241 | 1.90359321  | 0.474028042  | 1.7741951    | 0.202711802  |
| ENSMUSG00000055609.8   | Hba-x    | -1.45758 | 1.983989 | -3.00089 | 0.009097 | 0.100476 | -1.56518 | 2.240180792 | 4.115748966 | 1.90359321  | 1.754137352  | 0.508605059  | 1.38167324   |
| ENSMUSG00000054793.8   | Cadm4    | -1.4558  | 2.027723 | -5.34627 | 8.65E-05 | 0.009929 | 1.606098 | 2.473853138 | 3.319818877 | 2.53746531  | 1.322026339  | 1.10376329   | 1.409412315  |
| ENSMUSG00000047143.3   | Dmrt2a   | -1.4556  | 0.208613 | -2.87083 | 0.018227 | 0.117391 | -2.67481 | 1.224239248 | 1.397355478 | 0.21553721  | -0.567790743 | 0.380280962  | -1.397942607 |
| ENSMUSG000000102969.1  | Gm33366  | -1.45555 | 0.981689 | -4.41037 | 0.000527 | 0.201091 | -0.06911 | 1.999172692 | 1.328642728 | 1.72743625  | 0.474028042  | 0.380280962  | -1.493430984 |
| ENSMUSG00000005958.14  | Ephb3    | -1.45515 | 2.355661 | -5.15385 | 0.000124 | 0.010981 | 1.354975 | 2.830418235 | 3.533333147 | 2.82697193  | 2.3105307    | 1.429749638  | 1.202961437  |
| ENSMUSG00000034384.11  | Barhl2   | -1.45508 | 0.530333 | -3.02574 | 0.008651 | 0.098298 | -2.418   | 1.224239248 | 2.037179913 | 0.50504383  | 0.389140535  | 0.083299224  | -1.056091689 |
| ENSMUSG000000021379.1  | Id4      | -1.45427 | -0.05211 | -3.43187 | 0.00379  | 0.061196 | -1.82543 | 1.861669169 | 0.614946913 | 0.58993273  | -1.195821966 | -0.402127603 | -0.781271247 |
| ENSMUSG00000048001.7   | Hes5     | -1.45314 | 0.033752 | -3.23742 | 0.000563 | 0.078287 | -1.21238 | 0.861669169 | 0.829071718 | 0.50504383  | 0.202727411  | -1.139093197 | -1.056091689 |
| ENSMUSG00000034687.8   | Fras1    | -1.45229 | 2.127932 | -4.45201 | 0.000485 | 0.02053  | 0.100698 | 2.851327224 | 3.438696273 | 2.25506558  | 1.974103035  | 1.363407143  | 0.884991356  |
| ENSMUSG00000026825.17  | Dnm1     | -1.45126 | 1.861351 | -4.9365  | 0.001088 | 0.013297 | 0.946477 | 2.562802018 | 3.110642075 | 2.14715024  | 1.322026339  | 1.257796956  | 0.803691254  |
| ENSMUSG00000033419.15  | Snmp1    | -1.45052 | 0.643413 | -4.0504  | 0.001081 | 0.030547 | -0.72249 | 1.565276166 | 1.525679575 | 1.01523856  | 0.202727411  | -0.68002798  | -0.260439084 |
| ENSMUSG00000030376.7   | Sic8a2   | -1.45003 | 1.334345 | -3.80394 | 0.001779 | 0.039454 | -1.06708 | 2.072236155 | 2.478885363 | 1.56917417  | 1.126106129  | 1.020105398  | -0.260439084 |
| ENSMUSG00000030498.14  | Gas2     | -1.4494  | 0.291733 | -3.34912 | 0.004485 | 0.06816  | -1.90758 | 1.347095996 | 1.10037374  | 0.58993273  | 0.202727411  | -1.139093197 | -0.350636892 |
| ENSMUSG00000008658.15  | Rbfox1   | -1.44833 | -0.06552 | -3.35724 | 0.004412 | 0.067272 | -1.94202 | 3.76242341  | 0.925287033 | 0.74605193  | -1.195821966 | -0.798056279 | -0.446852208 |
| ENSMUSG00000097767.8   | Miat     | -1.44653 | 5.868991 | -9.53222 | 1.09E-07 | 0.007229 | 8.130932 | 6.516202911 | 6.88023377  | 6.37129244  | 5.470159886  | 4.98053965   | 4.99519357   |
| ENSMUSG00000046844.6   | Vat1l    | -1.44651 | 0.688503 | -3.58551 | 0.002772 | 0.050885 | -1.48116 | 1.158650906 | 1.853733772 | 1.1885701   | 0.202727411  | 0.508605059  | -0.781271247 |
| ENSMUSG00000032128.14  | Robo3    | -1.44477 | 4.47228  | -6.63579 | 8.66E-06 | 0.004774 | 3.831864 | 5.173255319 | 5.492691163 | 4.92621612  | 3.56874809   | 4.373976385  | 3.298793142  |
| ENSMUSG00000072653.17  | Zfp783   | -1.44443 | 0.118123 | -2.49972 | 0.024755 | 0.172784 | -2.24925 | 1.158650906 | 1.015484842 | 0.31863071  | 0.630148634  | -2.236828871 | -1.175505186 |
| ENSMUSG00000043079.17  | Synpo    | -1.44344 | 2.677603 | -5.01688 | 0.00161  | 0.012383 | 1.110106 | 1.333265588 | 4.053239764 | 3.00754417  | 2.52465505   | 1.640516735  | 1.706394053  |
| ENSMUSG00000073034.11  | Scn2b    | -1.44364 | 0.054026 | -2.17781 | 0.046092 | 0.217853 | -3.72169 | 1.017788371 | 0.494652679 | 0.67010308  | 1.126106129  | -2.724055698 | -0.260439084 |
| ENSMUSG00000060487.5   | Samd5    | -1.44362 | 0.008992 | -2.6598  | 0.018042 | 0.150179 | -0.70152 | 0.255948108 | 1.180544089 | 0.58993273  | 0.77101117   | -1.139093197 | -1.604393485 |
| ENSMUSG00000021047.6   | Novo1    | -1.44344 | 1.905411 | -4.53354 | 0.000413 | 0.018974 | 0.245233 | 2.743613407 | 2.88995396  | 2.25056558  | 1.754137352  | 0.380280962  | 1.409412315  |
| ENSMUSG00000041592.16  | Sdk2     | -1.44312 | 1.691258 | -3.93945 | 0.001352 | 0.034174 | -0.8226  | 2.28119583  | 3.354795016 | 1.80049971  | 0.836599512  | 1.062540664  | 0.884991356  |
| ENSMUSG00000040260.7   | Daam2    | -1.44254 | 1.945612 | -5.34154 | 8.73E-05 | 0.009929 | 1.642788 | 1.743613407 | 2.88995396  | 2.33101443  | 1.611532956  | 1.2938621    | 0.803691254  |
| ENSMUSG00000051375.15  | Pcdh1    | -1.44203 | 0.687743 | -3.26276 | 0.005347 | 0.075847 | -2.20888 | 1.840910608 | 1.803980737 | 0.58993273  | 0.389140535  | 0.163469573  | -0.660971703 |
| ENSMUSG00000021130.7   | Gaint16  | -1.44114 | 0.324848 | -3.11004 | 0.007293 | 0.090256 | -2.28881 | 0.941839517 | 1.699011178 | 0.50504383  | 0.389140535  | -1.139093197 | -0.446852208 |
| ENSMUSG00000028369.15  | Svep1    | -1.44088 | 0.956727 | -3.07496 | 0.007383 | 0.094343 | -3.2379  | 0.590367147 | 2.65759125  | 1.80049971  | 0.630148634  | -0.18802798  | 0.249755649  |
| ENSMUSG00000025776.13  | Crisp1d1 | -1.4403  | 0.691429 | -3.86614 | 0.001568 | 0.0366   | -1.0148  | 1.347095996 | 1.256492942 | 1.52673991  | 0.298942726  | 0.380280962  | -0.660971703 |
| ENSMUSG00000031548.7   | Sfrp1    | -1.43974 | 1.916105 | -5.03872 | 0.001155 | 0.011953 | 1.126761 | 2.500570476 | 3.228478566 | 2.25065558  | 1.227389465  | 1.020105398  | 1.265022405  |
| ENSMUSG00000010476.13  | Ebf3     | -1.43809 | 3.516042 | -7.02958 | 4.49E-06 | 0.004632 | 4.512325 | 4.022404999 | 4.729313938 | 3.96447548  | 3.038233373  | 2.675115396  | 2.6666710351 |
| ENSMUSG000000030235.15 | Arvcf    | -1.43734 | 2.843859 | -6.14427 | 2.03E-05 | 0.006477 | 3.061767 | 3.467095772 | 3.871957351 | 3.31239875  | 2.442778498  | 2.354895644  | 1.614030034  |
| ENSMUSG00000018604.18  | Tbx3     | -1.43667 | 1.596443 | -3.68058 | 0.002285 | 0.045287 | -1.28838 | 2.552655114 | 2.841455443 | 1.52673989  | 1.494493535  | 0.97638402   | 1.610719893  |
| ENSMUSG00000058975.6   | Kcnc1    | -1.43638 | -0.37361 | -2.74362 | 0.012565 | 0.13661  | -2.89608 | 0.376242341 | 0.058553564 | 0.41484602  | 0.099633918  | -1.345544075 | -1.845401584 |
| ENSMUSG00000035864.14  | Syt1     | -1.43393 | 0.313616 | -3.11747 | 0.007183 | 0.089586 | -2.27725 | 1.017788371 | 1.328642728 | 0.67010308  | 0.099633918  | 0.163469573  | -1.397942607 |
| ENSMUSG00000020601.7   | Trih2    | -1.43309 | 1.84672  | -5.20585 | 0.000113 | 0.010533 | 1.401141 | 2.390597634 | 3.04790632  | 2.33101443  | 1.07266687   | 0.884753545  | 1.35337828   |
| ENSMUSG00000021294.7   | Kif26a   | -1.43259 | 1.335427 | -3.9122  | 0.001429 | 0.034672 | -0.8767  | 2.107425583 | 2.685336241 | 1.39138705  | 1.07266687   | 0.445869304  | 0.309876641  |
| ENSMUSG00000026805.14  | Barhl1   | -1.43131 | 0.859189 | -3.19458 | 0.006142 | 0.081899 | -1.32528 | 1.286975003 | 2.199909414 | 1.24200942  | 1.01717157   | -0.958520951 | 0.367592139  |
| ENSMUSG00000022454.16  | Nel12    | -1.42993 | 2.11242  | -4.68422 | 0.000307 | 0.017404 | 0.518517 | 2.743613407 | 3.333331437 | 2.33101443  | 1.07266687   | 1.61222769   | 1.318676324  |
| ENSMUSG00000096870.2   | Gm21816  | -1.42549 | -0.00257 | -2.91281 | 0.010868 | 0.116722 | -2.61824 | 0.376242341 | 0.614946913 | 0.95250281  | 0.298942726  | -0.65366637  | -1.604393485 |
| ENSMUSG00000046402.10  | Rbp1     | -1.42538 | 0.36902  | -3.25135 | 0.005472 | 0.076896 | -2.05808 | 0.77680271  | 1.948370647 | 0.58993273  | -0.131691229 | -0.522421837 | -0.446852208 |
| ENSMUSG000000103657.1  | Gm37204  | -1.4246  | -0.09881 | -2.64643 | 0.018527 | 0.152011 | -0.30279 | 0.686852462 | 0.614946913 | 0.50504383  | 0.099633918  | -2.238628871 | -1.260439084 |
| ENSMUSG0000001497.18   | Pax9     | -1.42407 | 0.309967 | -3.36581 | 0.004335 | 0.065655 | -1.87842 | 0.861669169 | 1.397355478 | 1.740605193 | 0.202727411  | -0.29109629  | -0.056095689 |
| ENSMUSG00000027200.17  | Sema6d   | -1.42357 | 2.071156 | -5.99526 | 2.64E-05 | 0.006815 | 2.270719 | 2.91295242  | 2.936875008 | 2.53746531  | 1.322026339  | 1.583372827  | 1.170900228  |
| ENSMUSG00000035948.17  | Acs3     | -1.42281 | -0.30564 | -2.65856 | 0.018086 | 0.150179 | -0.30105 | 0.25948108  | 0.725978225 | 0.21553721  | -0.131691229 | -2.238628871 | -0.660971703 |
| ENSMUSG00000042035.11  | Igf3     | -1.42245 | 3.103065 | -4.11595 | 0.000521 | 0.020975 | -0.04368 | 3.78010701  | 4.668058249 | 3.09727433  | 2.563914936  | 2.561346521  | 1.989787546  |
| ENSMUSG00000022206.16  | Npr3     | -1.42216 | 1.387023 | -3.59174 | 0.002737 | 0.050452 | -1.44291 | 1.882133271 | 2.765506589 | 1.65047427  | 1.494493535  | -0.18802798  | 0.71753461   |
| ENSMUSG00000097051.1   | Gm26836  | -1.41904 | -0.0725  | -2.60056 | 0.020292 | 0.158008 | -3.09626 | 0.861669169 | 0.494652679 | 0.50504383  | 0.202727411  | -2.238628871 | -0.260439084 |
| ENSMUSG00000021994.14  | Wnt5a    | -1.41882 | 2.91791  | -6.63383 | 8.69E-06 | 0.004774 | 3.858561 | 3.596572296 | 3.810294511 | 3.44364329  | 2.71106863   | 1.799506258  | 1.246377909  |
| ENSMUSG00000038816.14  | Ctnn1a1  | -1.41502 | 1.308528 | -3.88549 | 0.001508 | 0.03601  | -0.92431 | 1.754753965 | 2.199909414 | 1.99808052  | 0.899335267  | 1.257796956  | -0.260439084 |
| ENSMUSG00000063564.13  | Col23a1  | -1.41313 | 1.78465  | -4.61866 | 0.000349 | 0.018054 | 0.38961  | 4.218866679 | 3.026373159 | 2.30050532  | 1.494493535  | 0.97638402   | 0.761255988  |
| ENSMUSG00000093843.1   | Gm25939  | -1.40747 | 0.920645 | -3.65366 | 0.002413 | 0.046328 | -1.34787 | 1.565276166 | 2.037179913 | 1.39138705  | 0.567790743  | 0.37638402   | 0.121431552  |
| ENSMUSG00000039275.14  | Raver2   | -1.40643 | 1.069299 | -3.92614 | 0.001389 | 0.034458 | -0.86964 | 1.882133271 | 2.037179913 | 1.34329276  | 1.01717157   | 0.31568212   | -0.175550186 |
| ENSMUSG00000097265.1   | Gm26803  | -1.40603 | -0.18746 | -2.40397 | 0.02985  | 0.186992 | -3.38618 | 0.109686335 | 0.219018236 | 1.07535956  | 0.389140535  | -0.65366637  | -2.134908201 |
| ENSMUSG00000034460.9   | Six4     | -1.40585 | 1.936242 | -5.0781  |          |          |          |             |             |             |              |              |              |

|                        |              |          |          |          |          |          |           |              |             |             |              |              |              |
|------------------------|--------------|----------|----------|----------|----------|----------|-----------|--------------|-------------|-------------|--------------|--------------|--------------|
| ENSMUSG00000044349.15  | Snhg11       | -1.34768 | 2.203336 | -5.28084 | 9.79E-05 | 0.010266 | 1.568006  | 2.809201749  | 2.913605228 | 2.82697193  | 1.883905227  | 1.824380927  | 0.961953338  |
| ENSMUSG000000031517.7  | Gpm6a        | -1.34494 | 1.301433 | -3.59224 | 0.002734 | 0.050452 | -1.4414   | 1.798475342  | 2.65759125  | 1.5267389   | 1.07266687   | -0.091787482 | 0.849413917  |
| ENSMUSG00000027996.13  | Sfrp2        | -1.34483 | 0.955425 | -3.14746 | 0.006759 | 0.086299 | -2.21391  | 1.565276166  | 2.380481659 | 0.95625081  | 1.07266687   | -0.091787482 | 0.849413917  |
| ENSMUSG000000402671.12 | Rgs8         | -1.34453 | 0.199485 | -2.85321 | 0.012254 | 0.191766 | -7.0257   | 1.709666075  | 0.829071718 | 1.1045059   | -0.262936162 | 0.522421837  | -0.660977013 |
| ENSMUSG000000062380.3  | Tab3b        | -1.34419 | 1.426519 | -4.80082 | 0.002241 | 0.014998 | 0.543412  | 1.474081474  | 4.41193443  | 5.693898254 | 4.41193443   | 3.875223421  | 3.024171139  |
| ENSMUSG00000052387.15  | Trpm3        | -1.34021 | -0.14195 | -2.66175 | 0.017972 | 0.149791 | -0.00619  | 0.124703574  | 1.462943811 | 1.1045059   | -1.195821966 | -0.29109629  | -0.056995689 |
| Fam171a1               | Fam171a1     | -1.33888 | 2.066084 | -4.35505 | 0.000588 | 0.022413 | -0.07463  | 2.787668587  | 3.150999813 | 2.22883404  | 2.086213402  | 1.143840766  | 1.098994575  |
| ENSMUSG00000079466.2   | Pdm12i       | -1.33875 | 0.206843 | -3.42469 | 0.003846 | 0.061912 | -1.7965   | 0.590367147  | 1.180544089 | 0.88691447  | -0.567790743 | -0.402127603 | -0.446852208 |
| ENSMUSG000000103928.1  | Gms37893     | -1.33849 | -0.14148 | -2.2754  | 0.003826 | 0.205896 | -3.57236  | 1.122439248  | 0.058553564 | 0.1045059   | 0.298942726  | -0.402127603 | -1.234902871 |
| ENSMUSG000000502772.9  | Dscam        | -1.33841 | 0.13221  | -3.15727 | 0.006626 | 0.08574  | -2.22757  | 0.487273654  | 1.328642728 | 0.67010308  | -0.954813866 | -0.188027997 | -0.549954701 |
| ENSMUSG000000104469.1  | Gm37663      | -1.33795 | -0.14589 | -2.97128 | 0.009659 | 0.104187 | -1.539    | 0.487273654  | 0.219018236 | 0.74605193  | -0.131691629 | -1.13909319  | -1.056905689 |
| ENSMUSG00000096010.2   | Hist4h4      | -1.3368  | 1.309238 | -2.96604 | 0.009761 | 0.104875 | -2.54808  | 2.30224176   | 2.414034219 | 1.24200942  | 1.534570974  | -0.522421837 | 0.884991356  |
| ENSMUSG000000054863.8  | Fam19a5      | -1.33585 | 0.222732 | -3.08702 | 0.007641 | 0.092209 | -2.33134  | 0.590367147  | 1.397355478 | 0.67010308  | -0.262936162 | -0.001589673 | -1.056905689 |
| ENSMUSG00000023972.9   | Ptk7         | -1.33532 | 3.271629 | -5.43999 | 7.27E-05 | 0.009286 | -1.838054 | 3.897293078  | 4.474916461 | 3.45500315  | 2.876127876  | 2.71556744   | 2.210866635  |
| ENSMUSG00000068130.11  | Zfp442       | -1.33477 | 0.369932 | -2.84996 | 0.012334 | 0.120323 | -2.70482  | 0.941839517  | 1.180544089 | 0.88691447  | 0.099633918  | 0.508605059  | -1.397942607 |
| ENSMUSG000000009091.15 | Mmp11        | -1.33159 | 0.549971 | -3.41993 | 0.003883 | 0.062178 | -1.76758  | 1.709666075  | 1.256492942 | 0.74605193  | -0.131691629 | -0.402127603 | 0.121431552  |
| ENSMUSG00000026883.17  | Dab2ip       | -1.32754 | 2.939011 | -5.45465 | 7.07E-05 | 0.009244 | 1.882504  | 3.57158994   | 3.758993282 | 3.40901694  | 3.024226515  | 1.77419517   | 2.096046233  |
| ENSMUSG00000043290.6   | Zfp784       | -1.32592 | 0.16535  | -2.74279 | 0.015291 | 0.13661  | -2.876    | 1.224239248  | 0.725978225 | 0.50504383  | 0.298942726  | -1.586552174 | -0.175550186 |
| ENSMUSG00000026347.13  | Tmem163      | -1.32407 | 0.57858  | -3.15791 | 0.006617 | 0.085711 | -2.19898  | 1.565276166  | 1.585800567 | 0.67010308  | -0.567790743 | 0.568726051  | -0.350636892 |
| ENSMUSG00000027797.15  | Dcl1k        | -1.32289 | 2.900678 | -5.66961 | 4.76E-05 | 0.008412 | 2.259633  | 3.411866251  | 4.031786655 | 3.24855227  | 2.639367164  | 1.942700894  | 2.129795025  |
| ENSMUSG000000102142.1  | Gm26930      | -1.32228 | 0.675077 | -3.50844 | 0.003243 | 0.055858 | -1.60977  | 1.266975003  | 0.925287033 | 1.65047427  | 0.630148634  | -0.091787482 | -0.350636892 |
| ENSMUSG00000022464.13  | Slc38a4      | -1.32149 | 1.153796 | -4.14481 | 0.000895 | 0.028111 | -0.48693  | 1.663123489  | 2.274871471 | 1.5267389   | 0.70229842   | 0.445869304  | 0.309876641  |
| ENSMUSG00000036617.16  | Et14         | -1.32136 | 1.440397 | -3.73389 | 0.00205  | 0.042346 | -1.19005  | 2.552565114  | 2.274871471 | 1.48301752  | 0.899335267  | 1.182834898  | 0.249755649  |
| ENSMUSG000000150293.1  | Gm42843      | -1.32087 | -0.11451 | -3.08868 | 0.007615 | 0.092209 | -2.35782  | 0.376424341  | 0.725978225 | 0.58993273  | -1.195821966 | -0.522421837 | -0.660977013 |
| ENSMUSG00000037003.15  | Tns2         | -1.31999 | 0.655211 | -3.6574  | 0.002395 | 0.046328 | -1.36423  | 1.347095996  | 1.462943811 | 1.13307505  | 0.389140535  | -0.522421837 | 0.121431552  |
| ENSMUSG000000045219.7  | Hunk         | -1.31992 | 2.216552 | -4.24148 | 0.007737 | 0.0253   | -0.28808  | 0.376424341  | 3.593142542 | 2.33101443  | 1.974103035  | 1.220802748  | 1.134633784  |
| ENSMUSG00000071064.13  | Zfp827       | -1.31716 | 2.80384  | -5.13257 | 0.00013  | 0.01114  | 3.132974  | 3.439745284  | 3.822839764 | 3.08270153  | 2.620870821  | 2.266890163  | 1.15989456   |
| ENSMUSG00000031290.14  | Lrch2        | -1.31568 | 2.068191 | -5.32079 | 0.00985  | 0.162408 | -1.62408  | 2.6270203915 | 3.04790632  | 2.9407271   | 1.754137352  | 1.220802748  | 1.265022405  |
| ENSMUSG00000006720.16  | Zfp184       | -1.31331 | 0.673827 | -3.15225 | 0.006694 | 0.085955 | -2.20568  | 1.158650906  | 1.52679575  | 1.18857017  | 0.70229842   | 0.380280962  | -0.91251578  |
| ENSMUSG00000024598.8   | Fbn2         | -1.313   | 4.800936 | -5.2284  | 0.00108  | 0.010484 | 1.287996  | 5.37082066   | 5.93813692  | 5.01715577  | 4.858474011  | 3.945383053  | 3.675306375  |
| ENSMUSG00000031673.5   | Sca1         | -1.31284 | 3.481645 | -6.24178 | 1.71E-05 | 0.005836 | 3.25293   | 3.985051584  | 4.567280479 | 3.848667    | 3.257635752  | 2.57068027   | 2.655168729  |
| ENSMUSG00000035236.17  | Scal         | -1.31226 | 2.818391 | -5.55703 | 5.85E-05 | 0.008819 | 2.064659  | 3.97722069   | 3.405718951 | 3.4995687   | 2.891640875  | 1.965243463  | 1.150449233  |
| ENSMUSG00000025104.13  | Hdgf3        | -1.31113 | 2.875162 | -6.03335 | 2.47E-05 | 0.006757 | 2.878914  | 3.771305141  | 3.607715344 | 3.19535933  | 2.620870821  | 1.942700894  | 2.113019312  |
| ENSMUSG00000025529.14  | Zfp711       | -1.30966 | 1.176773 | -4.01636 | 0.001158 | 0.01338  | -0.7046   | 1.460306606  | 2.160915282 | 1.83568914  | 1.017171757  | 0.163469573  | 0.423087252  |
| ENSMUSG000000053936.6  | Aldh5a1      | -1.30889 | 0.763272 | -3.19487 | 0.006138 | 0.081889 | -2.13267  | 1.460306606  | 0.829071718 | 1.80049971  | 0.95495266   | -0.522421837 | 0.2072718802 |
| ENSMUSG000000063681.14 | Crb1         | -1.30855 | -0.10115 | -2.83863 | 0.012618 | 0.122107 | -2.73783  | 0.487273654  | 1.180544089 | 1.1045059   | -1.195821966 | -0.402127603 | -0.781271247 |
| ENSMUSG00000045215.216 | Asx3         | -1.30841 | 3.043087 | -4.83898 | 0.002227 | 0.014674 | 0.7579    | 3.814535193  | 3.976715272 | 3.23543677  | 3.038233373  | 2.421621757  | 1.771982914  |
| ENSMUSG00000074480.4   | Mex3a        | -1.30795 | 1.414616 | -5.17427 | 0.00012  | 0.010705 | 1.25333   | 4.57197688   | 5.335225378 | 4.30300065  | 4.034744837  | 2.937009782  | 3.505738432  |
| ENSMUSG00000035357.16  | Pdzr3        | -1.30688 | 1.791443 | -4.02504 | 0.001138 | 0.01338  | -0.66949  | 2.500570476  | 2.95977541  | 1.77004605  | 1.534570974  | 1.257796956  | 1.6259940135 |
| ENSMUSG000000108563.1  | Gm44686      | -1.30581 | 0.220006 | -2.88031 | 0.011604 | 0.115859 | -6.591    | 1.663123489  | 0.219018236 | 0.67010308  | -0.262936162 | -0.188002798 | -0.781271247 |
| ENSMUSG00000063430.9   | Wscd2        | -1.30532 | 0.381123 | -3.07137 | 0.007888 | 0.093823 | -2.34802  | 1.286975003  | 1.585800567 | 1.18630701  | -0.262936162 | -0.29109629  | -0.350636892 |
| ENSMUSG000000009948.16 | Gm38393      | -1.30524 | 1.741878 | -4.75679 | 0.00267  | 0.015701 | 0.627364  | 1.961204842  | 2.712557709 | 2.49407271  | 1.17763643   | 1.220802748  | 0.884991356  |
| ENSMUSG000000032609.13 | Cadm3        | -1.30254 | 1.438201 | -4.40912 | 0.000528 | 0.021091 | -0.00287  | 1.999172692  | 2.346130154 | 1.96844435  | 0.899335267  | 0.311568212  | 1.104557373  |
| ENSMUSG0000002174.14   | Cenpk        | -1.30202 | 0.187927 | -3.08737 | 0.007636 | 0.092209 | -2.33283  | 0.686582462  | 1.015484842 | 0.74605193  | 0.298942726  | -0.958520951 | -0.660977013 |
| ENSMUSG000000104118.1  | Gms37298     | -1.30048 | 1.108748 | -3.15071 | 0.006715 | 0.085977 | -2.2133   | 1.460306606  | 1.180544089 | 2.426434    | 1.367114228  | -0.091787482 | 0.309876641  |
| ENSMUSG00000040254.11  | Sema3d       | -1.29917 | 0.216035 | -2.89456 | 0.011276 | 0.113704 | -2.63672  | 1.404811494  | 0.829071718 | 1.18857017  | -0.011397395 | -0.188002798 | -1.056905689 |
| ENSMUSG00000029595.9   | Lhx5         | -1.29908 | 1.022542 | -3.54066 | 0.003077 | 0.05369  | -1.53593  | 1.709666075  | 2.199909414 | 1.31630701  | 0.099633918  | 0.884753548  | 0.249755649  |
| ENSMUSG00000033565.16  | Rbfxf2       | -1.29842 | 4.504431 | -6.5671  | 9.73E-06 | 0.004774 | 3.711749  | 5.07446082   | 5.527596778 | 4.82478437  | 4.358766886  | 3.67853006   | 3.526445537  |
| ENSMUSG00000031738.16  | Aff3         | -1.29726 | 2.550849 | -4.71989 | 0.00287  | 0.016293 | -5.74863  | 3.116090444  | 3.47093661  | 2.92825526  | 2.524655505  | 2.030813104  | 1.234252608  |
| ENSMUSG00000001864.13  | Aif1f        | -1.29214 | -0.01943 | -2.31131 | 0.035715 | 0.201284 | -3.52498  | 0.376424341  | 1.699011178 | -0.14703287 | 0.202724171  | -1.586552174 | -0.660977013 |
| ENSMUSG00000029636.10  | Waf3f        | -1.29096 | 1.661195 | -4.87036 | 0.00214  | 0.014141 | 0.813125  | 2.175329648  | 2.629302206 | 2.11886119  | 1.227389465  | 0.931296131  | 0.884991356  |
| ENSMUSG00000038777.19  | Sema6c       | -1.29095 | 2.784803 | -5.8895  | 3.19E-05 | 0.00726  | 2.63433   | 3.116090444  | 3.79763921  | 3.38546221  | 2.11293074   | 2.421621757  | 1.875075887  |
| ENSMUSG00000041605.16  | 5730559C18R  | -1.29012 | 0.714803 | -2.76012 | 0.01477  | 0.133664 | -2.85814  | 1.347095996  | 1.752450437 | 0.95250281  | -1.126106129 | -1.13909319  | 0.249755649  |
| ENSMUSG00000074793.10  | Hspa12b      | -1.29004 | 0.678709 | -3.40967 | 0.003965 | 0.062816 | -1.77504  | 0.776780271  | 1.853733772 | 1.39138705  | -0.011397395 | -0.188002798 | 0.249755649  |
| ENSMUSG000000074415.10 | 3110039108R1 | -1.2882  | 3.415986 | -5.94986 | 2.86E-05 | 0.006901 | 2.727803  | 3.88704261   | 3.96544416  | 4.20548355  | 3.458488581  | 2.590640828  | 2.388653745  |
| ENSMUSG000000097709.7  | 2810429104R1 | -1.28691 | -0.02928 | -2.67889 | 0.017369 | 0.146735 | -0.97723  | 0.686582462  | 0.725978225 | 0.31863071  | 0.099633918  | -0.402127603 | -1.604393485 |
| ENSMUSG00000024420.8   | Zfp521       | -1.28643 | 3.100279 | -5.65326 | 4.90E-05 | 0.008542 | 2.260599  | 3.749194439  | 3.954084298 | 3.46627426  | 2.952076729  | 2.564713245  | 1.933571536  |
| ENSMUSG00000029168.14  | Dpys15       | -1.28562 | 3.394783 | -5.57189 | 5.69E-05 | 0.008819 | 2.064409  | 4.049798765  | 4.514122543 | 3.53406865  | 3.106279648  | 2.675175395  | 2.469953857  |
| ENSMUSG00000036885.14  | Arhgef26     | -1.28556 | 1.13839  | -3.10396 | 0.007383 | 0.090726 | -2.2957   | 1.663123489  | 2.07961518  | 1.56917417  | 1.410835606  | -0.36566637  | 0.761255988  |
| ENSMUSG00000032850.16  | Rnr7c        | -1.28452 | 0.986557 | -3.81915 | 0.001725 | 0.03864  | -1.05935  | 1.224239248  | 1.56917417  | 0.474029432 | 0.163469573  | 0.367592139  | 0.367592139  |
| ENSMUSG00000028212.16  |              |          |          |          |          |          |           |              |             |             |              |              |              |

|                      |              |          |          |          |          |          |          |              |             |             |              |              |              |
|----------------------|--------------|----------|----------|----------|----------|----------|----------|--------------|-------------|-------------|--------------|--------------|--------------|
| ENSMUSG0000028519.16 | Dab1         | -1.2342  | 0.087268 | -2.90357 | 0.011073 | 0.11248  | -2.6276  | 1.089938156  | 0.829071718 | 0.21553721  | -0.262936162 | -0.798056279 | -0.549945701 |
| ENSMUSG0000086968.8  | 4933431E2ORI | -1.23404 | -0.19182 | -2.32647 | 0.034686 | 0.199707 | -3.49781 | 0.255948108  | 1.10037374  | -0.14703287 | 0.202727411  | -0.958520951 | -1.604393485 |
| ENSMUSG0000020875.9  | Hoxb9        | -1.23338 | 2.566282 | -3.87889 | 0.001528 | 0.036222 | -1.00188 | 3.339716465  | 3.732641955 | 2.47187697  | 2.563914936  | 1.77419517   | 1.15134576   |
| ENSMUSG00000405581.1 | Gm12786      | -1.23188 | 0.302352 | -2.39884 | 0.030149 | 0.18787  | -3.41059 | 1.224239248  | 1.525679575 | -0.01578833 | 0.389140535  | -0.091787482 | -1.217370362 |
| ENSMUSG0000008649.6  | Rim1b3       | -1.23186 | 3.38066  | -5.14878 | 0.001216 | 0.110114 | 1.296007 | 4.120403437  | 3.859833972 | 3.88271448  | 3.468867727  | -0.805765249 | 2.146377909  |
| ENSMUSG0000022367.7  | Has2         | -1.23181 | 0.706599 | -3.19778 | 0.006102 | 0.081642 | -2.12888 | 1.798475342  | 1.462943819 | 0.81820172  | -0.407326071 | 0.380280962  | 0.187018993  |
| ENSMUSG00000089774.2 | Sic3a3       | -1.23169 | 2.501442 | -3.29624 | 0.004995 | 0.072879 | -2.10279 | 3.453485334  | 3.337412937 | 2.44933344  | 3.065848604  | 1.429749368  | 1.262022405  |
| ENSMUSG0000025577.7  | Cbx2         | -1.23163 | 2.44753  | -4.54997 | 0.0004   | 0.018566 | 0.628622 | 3.199991702  | 3.533333147 | 2.49407271  | 2.139162282  | 1.61222769   | 1.706394053  |
| ENSMUSG0000041722.11 | Tox          | -1.23155 | 0.759345 | -3.1548  | 0.006659 | 0.085817 | -2.2003  | 0.779680271  | 1.853733772 | 1.43792963  | 0.771011107  | -0.188002798 | -0.095379837 |
| ENSMUSG0000044807.13 | Zfp354c      | -1.23138 | 1.901602 | -3.74553 | 0.002003 | 0.042282 | -1.18639 | 2.390597634  | 3.004513725 | 2.090006333 | 2.031246943  | 1.228027478  | 0.672446721  |
| ENSMUSG00000069171.1 | Nr2f1        | -1.23066 | 3.785611 | -5.01085 | 0.001663 | 0.012385 | 0.9897   | 4.328575908  | 4.695604576 | 4.11528574  | 3.597411848  | 3.502707024  | 2.45671803   |
| ENSMUSG0000030352.14 | Tspan9       | -1.23062 | 1.687595 | -4.63994 | 0.000335 | 0.017796 | 0.420319 | 2.390597634  | 2.571003565 | 2.03050532  | 0.836599512  | 1.062540664  | 1.234325608  |
| ENSMUSG0000049907.8  | Ras11b       | -1.23042 | 0.121119 | -2.44291 | 0.027668 | 0.18028  | -3.3356  | 0.124703574  | 1.397355478 | 0.58993273  | 0.630148634  | -0.958520951 | -1.056905689 |
| ENSMUSG0000085246.1  | Gm15893      | -1.22981 | 0.269301 | -2.70777 | 0.016398 | 0.142241 | -2.93054 | 0.686582462  | 1.328642728 | 0.58993273  | -0.011397395 | 0.239418426  | -1.217370362 |
| ENSMUSG0000020135.13 | Apc2         | -1.22921 | 4.335832 | -6.62493 | 8.82E-06 | 0.004774 | 3.820046 | 4.884670994  | 5.395257012 | 4.58218323  | 3.955771213  | 3.465768861  | 3.73134041   |
| ENSMUSG0000034799.16 | Unc13a       | -1.22914 | 2.255161 | -3.17904 | 0.006339 | 0.083118 | -2.28344 | 2.500570476  | 3.337412937 | 2.67981823  | 2.031246943  | 2.453862094  | 0.528056811  |
| ENSMUSG0000024534.15 | Sncap        | -1.22886 | 0.689938 | -3.15081 | 0.006713 | 0.085977 | -2.20788 | 1.347095996  | 1.853733772 | 0.81820172  | 0.099633169  | -0.401272603 | 0.423087252  |
| ENSMUSG0000029436.9  | Mmp17        | -1.22815 | -0.27186 | -2.82174 | 0.013054 | 0.124854 | -2.77356 | 0.124703574  | 0.494652679 | 0.41484602  | -0.954813866 | -0.798056279 | -0.91251578  |
| ENSMUSG0000049804.9  | Armcx4       | -1.22802 | 3.900997 | -4.99377 | 0.001619 | 0.012548 | 0.941295 | 4.723907998  | 4.806673973 | 3.95650474  | 3.895493201  | 3.108834316  | 2.919168471  |
| ENSMUSG0000032012.7  | Nectin1      | -1.22714 | 2.472093 | -4.00357 | 0.001188 | 0.031763 | -0.75434 | 2.830418235  | 3.664577681 | 2.75527046  | 2.54441876   | 1.182834898  | 1.585038134  |
| ENSMUSG0000040258.1  | Nxph4        | -1.22646 | 0.514888 | -2.68395 | 0.017195 | 0.146277 | -2.97351 | 1.089938156  | 2.120837843 | 0.31863071  | -0.262936162 | -0.001589673 | -1.175505186 |
| ENSMUSG0000037709.13 | Fam13a       | -1.22471 | -0.01279 | -2.20537 | 0.043743 | 0.214017 | -3.67856 | 1.347095996  | 0.725978225 | -0.29142278 | 0.389140535  | -1.586552174 | -0.660977013 |
| ENSMUSG0000033291.8  | Crabp1       | -1.22377 | 3.011026 | -4.98482 | 0.000172 | 0.012592 | 1.030299 | 3.397722069  | 4.242553751 | 3.24855227  | 2.675663294  | 2.371868722  | 1.291979505  |
| ENSMUSG0000034818.16 | Celf5        | -1.22298 | 0.084446 | -2.64928 | 0.018423 | 0.151573 | -3.02107 | 0.487273654  | 1.015484842 | 0.50504383  | -0.011397395 | -0.991787482 | -1.397942607 |
| ENSMUSG0000031342.17 | Gpm6b        | -1.22071 | 2.997573 | -6.66395 | 8.26E-06 | 0.004774 | 3.818036 | 3.558934639  | 3.758993282 | 3.48855571  | 2.6934757    | 2.156388552  | 2.331791418  |
| ENSMUSG0000048078.5  | Temn4        | -1.2199  | 3.806501 | -4.74874 | 0.000271 | 0.015809 | 0.489198 | 4.654227089  | 4.850673973 | 3.74142048  | 3.56874809   | 3.229479235  | 2.798454606  |
| ENSMUSG0000041741.10 | Pde3a        | -1.21925 | 1.083601 | -3.93655 | 0.00136  | 0.034272 | -0.84952 | 1.0615029201 | 1.803980737 | 1.65047247  | 0.771011107  | 0.083299224  | 0.577809846  |
| ENSMUSG0000014303.13 | Gli3         | -1.21863 | 2.514309 | -3.95319 | 0.001315 | 0.033365 | -0.85477 | 0.36330303   | 3.593142542 | 2.66032206  | 2.484297768  | 2.113887544  | 1.170902208  |
| ENSMUSG0000062312.5  | Erb2         | -1.21838 | 2.048786 | -4.01983 | 0.00115  | 0.013138 | -0.68907 | 2.809201749  | 2.936875008 | 2.17489523  | 2.002957898  | 1.523871816  | 0.84913917   |
| ENSMUSG0000048385.8  | Scri1        | -1.21766 | 2.140492 | -3.888   | 0.0015   | 0.039595 | -0.93911 | 2.473853138  | 3.517985183 | 2.426434    | 1.017171757  | 1.493135018  | 1.153537828  |
| ENSMUSG0000078878.9  | Gm14305      | -1.21765 | 0.075808 | -2.63055 | 0.019121 | 0.153734 | -0.04978 | 0.7767800271 | 0.219018236 | 0.952510267 | 0.202727411  | -1.345540075 | -0.350636892 |
| ENSMUSG0000030410.7  | Elav3        | -1.21716 | 3.195304 | -4.23495 | 0.000747 | 0.025405 | -0.40718 | 3.176739589  | 4.58211552  | 3.15413668  | 2.876127876  | 2.500910667  | 2.331791418  |
| ENSMUSG0000027220.2  | Syt13        | -1.21759 | 0.557368 | -2.97813 | 0.009526 | 0.103577 | -2.49572 | 1.158650906  | 1.699011178 | 0.74605193  | -0.567790743 | 0.568726051  | -0.260439084 |
| ENSMUSG0000048251.15 | Bcl11b       | -1.21716 | 1.8871   | -3.46376 | 0.003551 | 0.058821 | -1.70486 | 2.577876203  | 3.228478566 | 1.76443046  | 1.611532956  | 0.786996222  | 1.33537828   |
| ENSMUSG00000104145.1 | D130019J16RI | -1.21654 | 0.52793  | -2.9115  | 0.010897 | 0.111729 | -2.60495 | 1.089938156  | 1.328642728 | 0.59250281  | 0.70229842   | -0.958520951 | 0.052718802  |
| ENSMUSG0000037071.2  | Scd1         | -1.21611 | 2.194396 | -3.83858 | 0.001658 | 0.03778  | -1.06675 | 2.871937504  | 3.371970159 | 2.2021167   | 2.086213406  | 1.020105398  | 1.614030034  |
| ENSMUSG0000027223.15 | Mapk8ip1     | -1.21294 | 2.325373 | -3.91761 | 0.014143 | 0.034545 | -0.90904 | 3.027006901  | 3.607715344 | 2.22883404  | 1.852541502  | 1.799506258  | 0.546633784  |
| ENSMUSG0000045179.9  | Sox3         | -1.21263 | 1.191413 | -4.10912 | 0.000961 | 0.028977 | -0.5432  | 1.89010608   | 1.993458536 | 1.56917417  | 0.771011107  | 0.445869304  | 0.528056811  |
| ENSMUSG0000025001.11 | Hells        | -1.20962 | 3.20538  | -5.70697 | 4.44E-05 | 0.008335 | -2.31516 | 3.927143006  | 3.678449855 | 3.73211274  | 3.245613223  | 2.302744362  | 2.36218488   |
| ENSMUSG0000061615.2  | Hist1h2ab    | -1.20913 | 2.189177 | -3.23522 | 0.006565 | 0.078474 | -2.16808 | 2.698170436  | 3.38943238  | 2.25065558  | 2.620870821  | 0.735375921  | 1.436633784  |
| ENSMUSG0000097242.1  | Gm16907      | -1.20889 | 3.39057  | -3.16656 | 0.005602 | 0.084626 | -2.19262 | 1.089938156  | 0.614946913 | 1.18857017  | 0.202727411  | -0.401272603 | -0.350636892 |
| ENSMUSG0000007207.10 | Six1a        | -1.20886 | 0.670002 | -3.5161  | 0.003192 | 0.051414 | -1.97919 | 1.089938156  | 1.256492942 | 1.43792963  | 0.099633169  | 0.311568212  | -1.175505186 |
| ENSMUSG0000021318.15 | Gli3         | -1.20866 | 3.555559 | -4.80914 | 0.00241  | 0.014998 | 0.638862 | 4.477219989  | 4.175661867 | 3.74142048  | 3.643954434  | 2.878828711  | 2.416265986  |
| ENSMUSG0000049916.9  | 2610318NO2R  | -1.20567 | 0.698489 | -2.95901 | 0.020516 | 0.158008 | -3.12748 | 1.513745865  | 1.462943819 | 0.81820172  | 0.771011107  | 0.681936662  | -1.05905689  |
| ENSMUSG0000018427.7  | Ypel2        | -1.2052  | 0.974001 | -3.25007 | 0.005487 | 0.076935 | -0.03794 | 1.286975003  | 1.643516065 | 1.80049971  | 0.630148634  | -0.401272603 | -0.884991356 |
| ENSMUSG0000042078.14 | Svop         | -1.20422 | 0.421597 | -2.8352  | 0.012706 | 0.122484 | -2.72843 | 1.089938156  | 1.462943819 | 0.67010308  | -0.567790743 | -0.65366627  | -0.528056811 |
| ENSMUSG0000038765.13 | Lmx1b        | -1.20349 | 0.382873 | -3.01459 | 0.008849 | 0.099056 | -2.43929 | 0.681669169  | 0.494652679 | 1.48301752  | 0.096633918  | -0.29109639  | -0.350636892 |
| ENSMUSG0000068270.15 | Shroom4      | -1.2026  | 1.375413 | -3.23397 | 0.005669 | 0.078512 | -0.08127 | 1.961204842  | 1.699011178 | 2.06056255  | 1.825540556  | 0.626441549  | 0.052718802  |
| ENSMUSG0000029121.5  | Crm1p        | -1.20175 | 3.840663 | -4.63679 | 0.003367 | 0.017814 | 0.628891 | 4.218312937  | 5.148510261 | 3.89641556  | 3.625517186  | 3.187635884  | 2.89737941   |
| ENSMUSG0000026675.12 | Hsd1b7       | -1.20128 | 2.003655 | -4.32287 | 0.006627 | 0.023298 | -0.13218 | 2.14886679   | 3.170763068 | 2.2808267   | 1.573565106  | 1.062540664  | 1.15134576   |
| ENSMUSG0000026915.16 | Strp1        | -1.2002  | 3.718887 | -5.7351  | 4.22E-05 | 0.008091 | 2.326451 | 4.290806865  | 4.521837508 | 4.07903521  | 3.766811182  | 2.86905544   | 2.787292398  |
| ENSMUSG0000032135.14 | Mcam         | -1.20016 | 0.673427 | -3.20615 | 0.005999 | 0.080764 | -2.11556 | 1.404811494  | 1.643516065 | 0.81820172  | -0.011397395 | 0.445869304  | -0.260439084 |
| ENSMUSG0000073805.4  | Fam196a      | -1.2     | 0.125576 | -2.81402 | 0.013258 | 0.125817 | -2.7656  | 0.776800271  | 0.925287033 | 2.41846602  | 0.202727411  | -0.65366637  | -0.91251578  |
| ENSMUSG0000070643.11 | Sox13        | -1.19877 | 1.773711 | -4.27327 | 0.000692 | 0.024199 | -2.21278 | 2.446631669  | 2.380481659 | 2.2021167   | 1.719785847  | 1.220802748  | 0.672446721  |
| ENSMUSG0000027298.17 | Tyro3        | -1.19835 | 1.32898  | -3.63167 | 0.002524 | 0.047898 | -1.37164 | 1.922210711  | 2.199909414 | 1.61039683  | 1.453270872  | 0.311568212  | 1.453270872  |
| ENSMUSG0000027574.1  | Nkain4       | -1.19803 | -0.02549 | -2.4793  | 0.025767 | 0.17605  | -3.27756 | 0.25948108   | 1.10037374  | 0.31863071  | 0.298942726  | -1.345544075 | -0.781271247 |
| ENSMUSG0000010175.13 | Prox1        | -1.1973  | 1.584516 | -3.8782  | 0.001531 | 0.036222 | -0.93227 | 2.107425583  | 2.816580774 | 1.72743625  | 0.836599512  | 1.020105398  | 0.998947545  |
| ENSMUSG0000032101.6  | Dlx25        | -1.1965  | -0.04715 | -2.67946 | 0.01735  | 0.1467   | -2.97678 | 0.590367147  | 1.015484842 | 1.0405091   | 0.407326071  | -1.139093197 | -0.446852208 |
| ENSMUSG0000087620.7  | S330434G04R  | -1.19619 | 0.68989  | -3.01003 | 0.008931 | 0.099585 | -2.44308 | 1.089938156  | 1.397355478 | 1.29353973  | 0.95945626   | -0.65366637  | 0.052718802  |
| ENSMUSG0000060510.13 | Zfp266       | -1.19576 | 4.052442 | -5.45001 | 7.13E-05 | 0.009244 | 1.774496 | 4.811870936  | 4.722634782 | 4.34634608  | 4.174466915  | 3.108834316  | 3.150490417  |
| ENSMUSG0000032064.11 | Dlx1c1       | -1.19477 | 1.878957 | -3.33506 | 0.004615 | 0.06951  | -1.9419  | 2.47         |             |             |              |              |              |

|                       |             |          |          |          |            |          |          |              |             |             |              |              |               |
|-----------------------|-------------|----------|----------|----------|------------|----------|----------|--------------|-------------|-------------|--------------|--------------|---------------|
| ENSMUSG00000041147.10 | Brc2a       | -1.14724 | 2.693387 | -4.23382 | 0.000749   | 0.025405 | -0.34391 | 3.06330303   | 3.319818877 | 3.2998535   | 3.010082333  | 1.61222769   | 1.855038134   |
| ENSMUSG000000107947.1 | Gm44438     | -1.14723 | -0.04125 | -2.25977 | 0.039431   | 0.208097 | -3.59912 | 0.590367147  | 1.015484842 | -0.01578833 | 0.298942726  | -1.58552174  | -0.549945701  |
| ENSMUSG00000035610.14 | Slc1a3      | -1.1463  | 0.954573 | -3.44214 | 0.003711   | 0.060365 | -1.70738 | 1.565276166  | 1.752450437 | 1.29353973  | 0.630148626  | -0.09178742  | 0.577809846   |
| ENSMUSG00000051817.8  | Sox12       | -1.1453  | 0.101423 | -4.59777 | 0.000364   | 0.01826  | 0.309086 | 3.546167343  | 4.195092397 | 3.06798002  | 2.639361764  | 2.21140405   | 2.240525292   |
| ENSMUSG00000035551.6  | Igf1bp1     | -1.1441  | 2.991191 | -4.21417 | 0.000779   | 0.02597  | -0.41785 | 3.546167343  | 4.155966066 | 3.08270153  | 2.544418766  | 1.872789445  | 2.745015347   |
| ENSMUSG00000031302.16 | Nlgn3       | -1.14327 | 0.089007 | -2.55815 | 0.022066   | 0.163863 | -3.16033 | 1.08938156   | 0.725978225 | 0.21553721  | -0.262936162 | -1.139093197 | -0.095379837  |
| ENSMUSG00000028763.17 | Hsp2e       | -1.14148 | 0.061674 | -4.88769 | 0.000207   | 0.014101 | 0.718777 | 4.456900005  | 5.343955783 | 4.13660674  | 3.56874809   | 3.557642552  | 3.063191594   |
| ENSMUSG00000062444.14 | Ap3b2       | -1.14018 | 1.485534 | -3.09151 | 0.005752   | 0.091786 | -3.44244 | 1.798475342  | 2.510249534 | 1.80049971  | 1.227389465  | 1.523871816  | 0.052718802   |
| ENSMUSG00000033768.16 | Nrxn2       | -1.13828 | 1.915547 | -4.50975 | 0.000433   | 0.019425 | 0.203889 | 2.55265114   | 2.17489523  | 1.7489523   | 1.275483753  | 1.5539290    | 1.170902002   |
| ENSMUSG0000002568.16  | Cnkr2       | -1.13725 | 1.404752 | -3.85451 | 0.001606   | 0.037213 | -0.97557 | 1.798475342  | 2.120837843 | 1.96844405  | 1.275483753  | 0.380280962  | 0.884991356   |
| ENSMUSG00000026039.9  | Sgo2a       | -1.13685 | 0.568755 | -2.65112 | 0.018355   | 0.151219 | -0.30296 | 1.08938156   | 1.015484842 | 1.13307505  | 1.126106129  | -0.29109629  | -0.660977101  |
| ENSMUSG00000102336.1  | Gm37233     | -1.13559 | 0.335577 | -2.83657 | 0.012671   | 0.122354 | -2.72645 | 0.686582462  | 1.462943819 | 0.67010308  | -0.567790743 | -0.29109629  | 0.052718802   |
| ENSMUSG00000044452.10 | Zfp507      | -1.13557 | 2.142309 | -4.23304 | 0.00075    | 0.025405 | -0.30095 | 2.698170436  | 2.913605228 | 2.4493344   | 2.139162282  | 1.583372827  | 1.070206228   |
| ENSMUSG00000035413.8  | Tmem98      | -1.13524 | 0.891317 | -3.08704 | 0.007641   | 0.092209 | -2.31625 | 1.404811494  | 1.256492942 | 1.56917417  | 0.95945626   | 0.508605059  | -0.350636829  |
| ENSMUSG00000037736.18 | Limch1      | -1.13499 | 2.540083 | -3.55878 | 0.002927   | 0.052791 | -1.60997 | 2.951554672  | 3.607715344 | 2.71803755  | 2.876127876  | 1.29386621   | 1.79319888    |
| ENSMUSG00000057880.12 | Abat        | -1.13494 | 1.963759 | -3.46431 | 0.003547   | 0.058821 | -1.71265 | 2.500570476  | 3.110642075 | 1.99980852  | 2.002957898  | 0.786906222  | 1.381667324   |
| ENSMUSG00000030386.17 | Zfp606      | -1.13467 | 2.455357 | -4.47838 | 0.00046    | 0.020627 | 0.134939 | 2.932058497  | 2.95977541  | 0.50310675  | 2.602134258  | 1.748432074  | 1.436633784   |
| ENSMUSG00000024011.16 | Pi16        | -1.13449 | 0.029783 | -2.68463 | 0.017172   | 0.146277 | -0.96739 | 0.861669169  | 0.219018236 | 0.67010308  | -0.262936162 | -0.958520951 | -0.350636829  |
| ENSMUSG00000026211.17 | Obsl1       | -1.13396 | 2.884538 | -3.9122  | 0.001429   | 0.034672 | -0.98392 | 3.30981498   | 3.976715272 | 3.03807854  | 2.69347457   | 2.675115396  | 1.614030034   |
| ENSMUSG00000038331.15 | Satb2       | -1.13361 | 1.165268 | -3.56367 | 0.002898   | 0.052591 | -1.49232 | 1.615029201  | 1.993458536 | 1.56917417  | 1.07266687   | 0.163469573  | 0.577809846   |
| ENSMUSG0000002623.15  | Shank3      | -1.13284 | 1.190702 | -3.17182 | 0.006433   | 0.084033 | -1.80205 | 1.347095996  | 2.380481659 | 1.5267389   | 1.227389465  | 0.234781826  | 0.423067252   |
| ENSMUSG00000053671.11 | Sl13pdx2a   | -1.13272 | 3.230394 | -5.46337 | 6.96E-05   | 0.009244 | 1.881639 | 3.749194439  | 4.155966066 | 3.477458    | 3.065845604  | 2.394831945  | 2.490666697   |
| ENSMUSG00000038236.8  | Hoxa7       | -1.13242 | 0.021051 | -2.54458 | 0.022664   | 0.166012 | -1.80203 | 1.107788371  | 0.614946913 | 1.040559    | -0.262936162 | -0.29109629  | -0.056095689  |
| ENSMUSG00000025558.15 | Docx9       | -1.13125 | 1.226601 | -3.32905 | 0.004672   | 0.070051 | -1.90536 | 1.961204842  | 1.993458536 | 1.39138705  | 1.322026339  | 0.163469573  | -0.50256811   |
| ENSMUSG00000030268.17 | Bcat1       | -1.13113 | 2.196722 | -4.01561 | 0.00116    | 0.031378 | -0.70696 | 2.651249389  | 3.02007601  | 2.33101443  | 2.11293074   | 1.429749638  | 1.35337828    |
| ENSMUSG00000030350.8  | Prrm18      | -1.13071 | 0.844231 | -2.97536 | 0.009579   | 0.103779 | -2.50451 | 1.347095996  | 1.525679575 | 1.24200942  | 1.017171757  | 0.380280962  | -0.446852020  |
| ENSMUSG00000022203.6  | Efs         | -1.13057 | 1.836855 | -3.99279 | 0.001214   | 0.032203 | -0.72962 | 2.46631669   | 2.712557709 | 0.20305032  | 1.534570974  | 1.493175018  | 0.803691254   |
| ENSMUSG00000042258.13 | Isl1        | -1.12853 | 1.883613 | -3.35887 | 0.004397   | 0.067181 | -1.89913 | 3.170763068  | 1.83568914  | 1.852541056 | 0.97834002   | 1.078537284  | 1.078537284   |
| ENSMUSG00000048812.10 | Lorrf2      | -1.12761 | 0.630509 | -2.92983 | 0.010502   | 0.109327 | -2.57564 | 0.861669169  | 1.901828061 | 0.88691447  | -0.011397395 | 0.239418426  | -0.095379837  |
| ENSMUSG00000086296.2  | D030055H07R | -1.1269  | 0.079691 | -2.74947 | 0.015088   | 0.135634 | -2.86689 | 0.861669169  | 0.829071718 | 0.31863071  | -0.748362989 | -0.522418267 | -0.260439084  |
| ENSMUSG00000032744.4  | Heyl        | -1.12576 | 0.978102 | -2.71312 | 0.016224   | 0.141185 | -2.95426 | 1.286975003  | 2.414034219 | 1.01523856  | 0.77011117   | -0.29109629  | 0.672446721   |
| ENSMUSG00000031523.16 | Dlc1        | -1.12531 | 2.583297 | -4.57981 | 0.000377   | 0.018298 | 0.314827 | 3.30981498   | 3.578421037 | 2.6405588   | 1.944659258  | 1.896530713  | 2.12795025    |
| ENSMUSG00000100252.6  | Mir124-2hg  | -1.12509 | 3.10717  | -5.29024 | 9.61E-05   | 0.010239 | 1.57901  | 3.946705272  | 3.84760767  | 3.22220094  | 2.779374643  | 2.500910667  | 2.346218488   |
| ENSMUSG00000037933.13 | Pcdhga6     | -1.12245 | -0.36522 | -2.14655 | 0.048898   | 0.221375 | -7.444   | -0.360723253 | 0.494652679 | 0.31863071  | 0.099633918  | -1.139093197 | -1.604393485  |
| ENSMUSG00000003073.17 | Car11       | -1.12207 | 0.037341 | -2.76344 | 0.014672   | 0.133118 | -2.84632 | 0.590367147  | 0.725978225 | 0.50504383  | -0.748362989 | -0.081802798 | -0.6609977013 |
| ENSMUSG00000018417.14 | Myo1b       | -1.12201 | 3.875419 | -7.15193 | 3.67E-06   | 0.004108 | 4.702845 | 4.267661528  | 4.681897157 | 3.40423296  | 3.587920399  | 3.216111053  | 3.15869117    |
| ENSMUSG00000051586.14 | Mical3      | -1.12132 | 3.032874 | -5.78771 | 3.84E-05   | 0.008043 | 2.461776 | 3.57158994   | 3.678449855 | 3.477458    | 2.812531965  | 2.561346521  | 2.090640623   |
| ENSMUSG00000030796.15 | Tea2d       | -1.12061 | 3.543493 | -4.5302  | 0.00416    | 0.018974 | 0.10713  | 1.417713372  | 4.60408592  | 3.52134654  | 3.426895457  | 2.842759456  | 2.678160372   |
| ENSMUSG00000099542.11 | Rps2-ps6    | -1.12026 | 1.274235 | -3.23566 | 0.00565    | 0.078474 | -0.07216 | 1.565726166  | 2.237877264 | 1.6894864   | 0.70229842   | 1.329055639  | 1.012431552   |
| ENSMUSG00000020341.8  | Ncan        | -1.11839 | 3.581361 | -3.84855 | 0.001625   | 0.037299 | -1.22917 | 3.846128318  | 4.632868821 | 3.91597693  | 3.783582628  | 2.192420947  | 3.112731563   |
| ENSMUSG00000042750.7  | Bex2        | -1.11821 | 0.936835 | -2.77563 | 0.014318   | 0.131231 | -2.84602 | 1.70666075   | 2.199909414 | 0.67010308  | 0.474029432  | 0.445869304  | 0.1012431552  |
| ENSMUSG00000017386.10 | Traf4       | -1.11755 | 2.62162  | -4.385   | 0.000554   | 0.021658 | -0.50141 | 3.183597264  | 3.622142414 | 2.75527046  | 2.484297768  | 1.640516735  | 2.043894951   |
| ENSMUSG00000042978.10 | Sbk1        | -1.1167  | 4.155177 | -4.82263 | 0.000235   | 0.014889 | 0.581318 | 4.806527614  | 5.263412356 | 4.10089465  | 3.848572153  | 3.247036134  | 3.5869505     |
| ENSMUSG00000030592.16 | Ryr1        | -1.11629 | 1.183456 | -3.77808 | 0.000175   | 0.040638 | -1.11688 | 1.615029201  | 1.993458536 | 1.61039683  | 0.836599512  | 0.568726051  | 0.476526511   |
| ENSMUSG00000027546.15 | Atp9a       | -1.11582 | 2.169031 | -5.092   | 0.00181    | 0.011551 | 1.2406   | 2.674900657  | 2.765506895 | 2.69905445  | 1.852541056  | 1.640516735  | 1.381667324   |
| ENSMUSG00000015599.8  | Tbt1        | -1.11555 | 0.90059  | -2.23301 | 0.041499   | 0.2115   | -3.72509 | 1.999172692  | 2.120837843 | 0.50504383  | -0.748362989 | 1.103763327  | 0.423087252   |
| ENSMUSG00000091383.1  | Hist1h2al   | -1.11325 | 1.518613 | -3.62029 | 0.002583   | 0.048607 | -1.39552 | 2.175329648  | 2.274871471 | 1.72743625  | 1.367114288  | 1.143840766  | 0.423087252   |
| ENSMUSG00000102918.11 | Pcdhgc3     | -1.1128  | 1.346511 | -3.8341  | 0.01673    | 0.03806  | -1.01302 | 1.798475342  | 2.310940726 | 1.65047427  | 0.77011107   | 0.786906222  | 0.761255988   |
| ENSMUSG00000041842.15 | Fhdci1      | -1.11247 | 0.833434 | -2.69294 | 0.001689   | 0.144822 | -2.97679 | 3.174095996  | 1.699011178 | 1.01523856  | 1.17763643   | 1.01523856   | -0.549945701  |
| ENSMUSG00000028370.7  | Pappa       | -1.11121 | 0.384687 | -2.34534 | 0.033445   | 0.196453 | -3.49809 | 0.686820642  | 1.397355478 | 0.67010308  | 0.202727411  | 0.568726051  | -1.217370362  |
| ENSMUSG00000042439.12 | Zfp532      | -1.11186 | 3.701406 | -5.32079 | 9.08E-05   | 0.009985 | 1.576847 | 4.40069366   | 4.35046909  | 3.89944156  | 3.383665405  | 3.147540581  | 2.66710351    |
| ENSMUSG00000031949.17 | Adat1       | -1.1114  | 0.696078 | -2.96684 | 0.009746   | 0.104827 | -2.51523 | 1.286975003  | 1.10037374  | 1.24200942  | 0.899335267  | -0.001589673 | -0.350636829  |
| ENSMUSG00000021699.17 | Pde4d       | -1.11039 | 1.597431 | -3.18408 | 0.006275   | 0.082773 | -1.8872  | 2.07236155   | 2.765506895 | 1.65047427  | 1.611532966  | 0.82080962   | 1.104557733   |
| ENSMUSG00000048960.13 | Prex2       | -1.10917 | 1.546762 | -3.7863  | 0.001844   | 0.040147 | -1.09722 | 2.361742772  | 2.380481659 | 1.61039683  | 1.07266687   | 0.931296131  | 0.923985488   |
| ENSMUSG00000052957.7  | Gas1        | -1.10872 | 3.593525 | -5.32585 | 8.99E-05   | 0.009985 | 1.597968 | 4.103073559  | 4.434615096 | 3.86579117  | 3.606841261  | 2.741918767  | 2.808908963   |
| ENSMUSG00000029673.17 | Aut5        | -1.1086  | 4.518853 | -4.84501 | 0.000225   | 0.014573 | 0.580984 | 4.996828752  | 5.456920032 | 4.73444531  | 4.324885999  | 4.246482989  | 3.335411733   |
| ENSMUSG00000042155.3  | Klhl23      | -1.10764 | 1.269264 | -3.12054 | 0.007139   | 0.089222 | -2.27528 | 1.615029201  | 1.752450437 | 1.93638314  | 1.494493535  | 0.836659257  | -0.01949804   |
| ENSMUSG00000028289.13 | Epha7       | -1.10721 | 3.332451 | -3.87916 | 0.001528   | 0.036222 | -1.12459 | 3.927143006  | 3.79763921  | 3.78079792  | 3.187912736  | 1.808839142  | 1.894839142   |
| ENSMUSG00000015217.11 | Hmbg3       | -1.10692 | 2.863846 | -4.4788  | 0.00046    | 0.020062 | 0.100672 | 3.657198655  | 3.63642664  | 2.97634955  | 2.71106863   | 1.799506262  | 2.402525292   |
| ENSMUSG00000020646.16 | Mboat2      | -1.10631 | 1.413258 | -3.53747 | 0.003057   | 0.05397  | -1.54087 | 2.175329648  | 2.237877264 | 1.48301752  | 1.275483753  | 0.681903368  | 0.629504135   |
| ENSMUSG00000028487.18 | Bnc2        | -1.10459 | 1.810759 | -3.56295 | 0.002902</ |          |          |              |             |             |              |              |               |

|                        |             |          |          |          |          |          |           |             |             |             |              |              |              |
|------------------------|-------------|----------|----------|----------|----------|----------|-----------|-------------|-------------|-------------|--------------|--------------|--------------|
| ENSMUSG00000034910.5   | Pygo1       | -1.07136 | 2.222778 | -3.86061 | 0.001586 | 0.036884 | -0.99954  | 2.577876203 | 2.95977541  | 2.6405588   | 2.463687488  | 1.429749638  | 1.265022405  |
| ENSMUSG00000021198.16  | Unc79       | -1.07    | 1.617829 | -2.23967 | 0.005604 | 0.07801  | -2.09031  | 1.961204842 | 2.346130154 | 2.2021167   | 0.474029432  | 1.919800492  | 0.803691254  |
| ENSMUSG00000005417.6   | Gm9938      | -1.06948 | 0.184117 | -2.51143 | 0.024192 | 0.170977 | -2.32375  | 0.861669169 | 0.925287033 | 0.1863071   | 0.202727411  | -0.29159269  | -0.91251578  |
| ENSMUSG00000019230.14  | Lhx9        | -1.06927 | 1.87826  | -3.39711 | 0.004068 | 0.064065 | -1.82862  | 2.208119583 | 2.765506589 | 2.22883404  | 2.058991933  | 0.626441549  | 1.381667324  |
| ENSMUSG00000036883.16  | Sdk1        | -1.06925 | 1.162552 | -2.44611 | 0.027495 | 0.180155 | -3.4203   | 1.404811494 | 2.765506589 | 1.01523856  | 0.554199971  | 1.182834888  | 0.202711802  |
| ENSMUSG00000052852.7   | Reep1       | -1.0679  | 1.387402 | -3.71361 | 0.002137 | 0.043572 | -1.22614  | 1.922107111 | 2.274871471 | 1.6504727   | 0.630148634  | 0.884753545  | 0.961953338  |
| ENSMUSG00000054423.3   | Cadps       | -1.0674  | 2.370832 | -4.18708 | 0.000822 | 0.026487 | -4.00052  | 1.890201749 | 3.502472184 | 2.4940721   | 1.719785847  | 1.82437807   | 1.075044937  |
| ENSMUSG00000044647.16  | Csrnp3      | -1.06694 | 2.391278 | -4.10567 | 0.000968 | 0.029048 | -0.55513  | 2.721070838 | 3.228478566 | 2.79156659  | 2.442778498  | 1.329055639  | 1.83471815   |
| ENSMUSG00000031391.18  | L1cam       | -1.06672 | 2.564998 | -3.93618 | 0.001361 | 0.034272 | -0.89373  | 3.232320309 | 3.650570823 | 2.51593215  | 1.820479846  | 2.268493308  | 1.894839142  |
| ENSMUSG00000040852.5   | Plekhh2     | -1.06669 | 1.042826 | -3.26905 | 0.005279 | 0.07552  | -2.00596  | 1.709666075 | 1.948370647 | 1.13307505  | 0.474029432  | 0.568726051  | 0.423087252  |
| ENSMUSG00000079259.2   | Trin17      | -1.06572 | 2.072771 | -3.2154  | 0.035018 | 0.200218 | -3.82417  | 2.012295242 | 3.388943238 | 1.83568914  | 2.62087821   | 2.009298624  | 2.462652511  |
| ENSMUSG00000008575.17  | Nfib        | -1.06469 | 3.030158 | -4.89063 | 0.000206 | 0.014093 | 0.853388  | 3.324843189 | 3.719283573 | 3.56393752  | 3.092939265  | 2.284933085  | 2.195012684  |
| ENSMUSG00000034685.4   | Fam171a2    | -1.06336 | 2.304379 | -4.32542 | 0.000624 | 0.023244 | -0.13875  | 2.765809153 | 3.02007601  | 2.53746531  | 1.611532956  | 1.583372827  | 2.026083675  |
| ENSMUSG000000013076.15 | Amotl1      | -1.06294 | 3.488122 | -4.44354 | 0.000493 | 0.020558 | -0.05216  | 4.103073559 | 4.418173949 | 3.52134564  | 3.32773999   | 3.088442528  | 2.469953857  |
| ENSMUSG000000039607.15 | Rbms3       | -1.06287 | 1.857148 | -3.66932 | 0.002338 | 0.045861 | -1.3243   | 2.072236155 | 2.982317978 | 2.11886119  | 1.573565106  | 1.396959703  | 0.998947545  |
| ENSMUSG00000040856.17  | Dkl1        | -1.06236 | 2.684414 | -3.68631 | 0.002258 | 0.044897 | -1.3882   | 3.354437971 | 3.745877783 | 2.55868179  | 2.583151155  | 2.113887544  | 1.750449233  |
| ENSMUSG00000017499.15  | Cdc6        | -1.06175 | 1.809607 | -4.07865 | 0.001022 | 0.030012 | -0.57283  | 2.674900657 | 2.310940726 | 2.03055032  | 1.494493535  | 1.143840766  | 1.202961437  |
| ENSMUSG00000014592.19  | Camta1      | -1.06167 | 2.824179 | -5.77916 | 3.90E-05 | 0.008043 | 2.448116  | 3.279280612 | 3.486790561 | 3.2744309   | 2.524655505  | 2.26899162   | 2.113019312  |
| ENSMUSG00000087535.1   | Zmi21os1    | -1.06092 | 0.229498 | -2.44918 | 0.027331 | 0.180136 | -3.33031  | 0.776780271 | 1.328642728 | 0.31863071  | -0.954813866 | 0.083299224  | -0.175550186 |
| ENSMUSG00000059146.12  | Ntrk3       | -1.0607  | 2.393181 | -2.99605 | 0.009187 | 0.100966 | -2.64896  | 2.932058497 | 3.907728662 | 2.06056255  | 1.883905227  | 1.824380927  | 1.750449233  |
| ENSMUSG00000028546.17  | Elav4       | -1.06069 | 3.068635 | -4.07788 | 0.001023 | 0.030012 | -0.69273  | 3.584135193 | 4.042553086 | 3.2220094   | 2.860462524  | 1.872879445  | 2.829593117  |
| ENSMUSG00000070583.1   | Fv1         | -1.06035 | 0.090135 | -2.47842 | 0.025811 | 0.176099 | -2.82125  | 0.376242341 | 1.10037374  | 0.41484602  | -0.131691629 | -0.958520951 | -0.260439084 |
| ENSMUSG00000031626.16  | Sorbs2      | -1.05923 | 2.752838 | -5.43091 | 7.39E-05 | 0.009355 | 1.846426  | 3.008510557 | 3.533333147 | 3.32483586  | 2.239564719  | 2.09356756   | 2.317218617  |
| ENSMUSG00000043857.16  | Mgat5b      | -1.05758 | 1.60694  | -3.42081 | 0.003876 | 0.062141 | -1.76117  | 1.666123489 | 2.65759125  | 2.06056255  | 1.367114228  | 1.220807748  | 0.672404671  |
| ENSMUSG00000088491.1   | Gm11944     | -1.05746 | 0.038444 | -2.50367 | 0.024564 | 0.171946 | -2.24212  | 0.376242341 | 1.015484842 | 0.31863071  | -0.131691629 | -0.798056279 | -0.549945701 |
| ENSMUSG0000004144.14   | Arhgap32    | -1.05487 | 3.091926 | -3.41502 | 0.003922 | 0.026504 | -1.98515  | 3.608903098 | 3.883980059 | 3.28455227  | 3.448031424  | 2.633496307  | 1.728589799  |
| ENSMUSG00000020359.13  | Phykp1      | -1.05346 | 3.331923 | -4.31843 | 0.000632 | 0.023239 | -0.26967  | 3.814535193 | 4.207104    | 3.51049826  | 3.509653342  | 2.405227319  | 2.546915839  |
| ENSMUSG00000034675.17  | Dbn1        | -1.05337 | 4.485833 | -5.9593  | 2.82E-05 | 0.006901 | -2.66388  | 5.065541502 | 5.290762844 | 4.66277353  | 4.347561341  | 3.83599457   | 1.71754525   |
| ENSMUSG00000030315.15  | Vgll4       | -1.05222 | 2.750892 | -5.2041  | 0.001113 | 0.010533 | 1.442743  | 3.369010772 | 3.302007601 | 3.14012981  | 2.563914936  | 1.827879445  | 2.257409221  |
| ENSMUSG00000023092.16  | Fhl1        | -1.0514  | 1.4773   | -3.0545  | 0.008162 | 0.095707 | -2.40978  | 2.240180792 | 2.274871471 | 1.48301752  | 1.126106129  | 1.429749638  | 0.309876641  |
| ENSMUSG00000027242.14  | Wdr76       | -1.05109 | 2.351847 | -3.25172 | 0.005468 | 0.076896 | -1.6378   | 2.809201749 | 3.19818877  | 2.47187697  | 2.675662394  | 1.062540664  | 1.771982394  |
| ENSMUSG00000060572.17  | Mifap2      | -1.05104 | 1.51641  | -3.18976 | 0.006203 | 0.082246 | -1.71119  | 2.332298994 | 2.446824154 | 1.332026339 | 1.322026339  | 0.681936622  | 0.993858488  |
| ENSMUSG00000040653.5   | Ppp1r14c    | -1.05008 | 0.403927 | -2.32844 | 0.034555 | 0.199437 | -3.52533  | 0.590367147 | 1.328642728 | 0.88691447  | 0.389140535  | -1.139093197 | 0.367592139  |
| ENSMUSG00000036466.4   | Lum         | -1.05004 | 0.583504 | -2.6385  | 0.018821 | 0.152835 | -3.05033  | 0.376242341 | 1.643516065 | 1.29353973  | 0.298942726  | -0.091787487 | -0.019430984 |
| ENSMUSG00000037016.11  | Frezn2      | -1.04951 | 1.91019  | -2.64846 | 0.018453 | 0.151728 | -3.19487  | 2.418886679 | 3.337412937 | 1.56917417  | 1.944659258  | 1.429749638  | 0.216255988  |
| ENSMUSG00000097023.8   | Mirr9-3hg   | -1.0494  | 1.444581 | -3.12042 | 0.00714  | 0.089222 | -2.28925  | 1.709666075 | 2.446824154 | 1.6894864   | 1.611532956  | 0.786906222  | 0.423087252  |
| Hist1h2af              |             | -1.04829 | 1.115498 | -2.58082 | 0.0211   | 0.159786 | -3.19088  | 1.404306606 | 2.380481659 | 1.07535956  | 1.410835606  | -0.001589673 | 0.367592139  |
| ENSMUSG00000045045.7   | Lfrna       | -1.04809 | 2.07442  | -3.61132 | 0.00263  | 0.048817 | -1.45141  | 2.390597634 | 3.04790632  | 2.30613976  | 2.11293074   | 1.55392905   | 1.0350168    |
| ENSMUSG00000028565.18  | Nfia        | -1.04795 | 2.180994 | -4.44185 | 0.00495  | 0.020563 | 0.080344  | 2.765809153 | 2.913605228 | 2.426434    | 1.852541056  | 1.77419157   | 1.35337828   |
| ENSMUSG00000067889.4   | Sptbn2      | -1.04572 | 3.645683 | -4.55773 | 0.000394 | 0.018566 | -1.041456 | 4.146014081 | 4.788047436 | 3.62555664  | 3.20893256   | 3.13889155   | 2.96662825   |
| ENSMUSG00000028358.16  | Zfp618      | -1.04512 | 3.366334 | -4.77569 | 0.002057 | 0.015525 | 0.599942  | 4.492329925 | 4.095212035 | 3.477458    | 3.269558919  | 4.21621757   | 2.38982504   |
| ENSMUSG00000029769.16  | Ccdc136     | -1.04488 | 0.95228  | -2.36436 | 0.032236 | 0.193285 | -3.52572  | 1.224239248 | 2.380481659 | 0.8120172   | 0.95495626   | 0.681936622  | -0.350636892 |
| ENSMUSG0000006357.6    | Wdr6        | -1.04334 | 3.962246 | -4.7633  | 0.000263 | 0.015641 | 0.492769  | 4.477219989 | 4.990681451 | 4.00368153  | 3.78358268   | 3.09867445   | 3.41968605   |
| ENSMUSG00000040478.16  | Prdm13      | -1.0429  | 0.524302 | -2.7596  | 0.014785 | 0.133694 | -0.85226  | 1.017788371 | 1.180544089 | 0.88691447  | 0.298942726  | 0.311568212  | -0.549945701 |
| ENSMUSG00000031284.16  | Pak3        | -1.04214 | 1.781249 | -3.48068 | 0.003431 | 0.057698 | -1.66537  | 2.526802018 | 2.629302206 | 1.80049971  | 1.534570974  | 0.786906222  | 1.409412315  |
| ENSMUSG0000002566.16   | Tmem47      | -1.04165 | 2.051548 | -2.80286 | 0.013558 | 0.126871 | -2.94427  | 2.765809153 | 2.712557709 | 2.14715024  | 2.675662394  | 0.626441549  | 1.381667324  |
| ENSMUSG00000020649.11  | Rrm2        | -1.04159 | 3.612567 | -4.49286 | 0.000447 | 0.019825 | -0.02321  | 4.013156922 | 4.482843377 | 3.848667    | 3.78358268   | 2.76626192   | 3.41968605   |
| ENSMUSG00000058773.17  | Hist1h1b    | -1.04091 | 3.710572 | -3.67503 | 0.002311 | 0.045533 | -1.5967   | 4.137527615 | 4.709182983 | 3.80494562  | 4.034744837  | 2.546473245  | 3.030557152  |
| ENSMUSG00000064080.12  | Fbin2       | -1.04046 | 2.578221 | -4.75878 | 0.000266 | 0.015701 | 0.644021  | 2.89201749  | 3.354795016 | 3.12598563  | 2.031246943  | 2.354895644  | 1.791319888  |
| ENSMUSG00000020160.18  | Meis1       | -1.04016 | 3.34422  | -5.07482 | 0.00145  | 0.011551 | 1.162356  | 4.040725182 | 4.053239764 | 3.477458    | 3.234894662  | 2.688725828  | 2.571683744  |
| ENSMUSG00000033420.12  | Anrx1       | -1.03969 | 2.09844  | -3.52867 | 0.003112 | 0.054302 | -1.60814  | 2.552655114 | 3.265711472 | 2.09000633  | 1.883905227  | 1.25796956   | 1.540658488  |
| ENSMUSG00000048728.15  | Zfp454      | -1.03915 | 0.16544  | -2.44474 | 0.027569 | 0.180155 | -3.37214  | 0.255948108 | 0.363408146 | 0.41846602  | -0.407326071 | -0.958520951 | -0.660977013 |
| ENSMUSG00000038526.14  | Car14       | -1.03912 | 0.736111 | -2.40742 | 0.02965  | 0.186632 | -3.42346  | 1.256492942 | 0.81820172  | 1.126106129 | 1.126106129  | 0.311568212  | -0.660977013 |
| ENSMUSG00000087574.1   | CO30037D09R | -1.0389  | 0.125125 | -2.35395 | 0.032892 | 0.19504  | -3.46933  | 0.686582462 | 0.494652679 | 0.67010308  | 0.389140535  | -1.139093197 | -0.350636892 |
| ENSMUSG00000062980.15  | Cped1       | -1.03839 | 1.898519 | -3.29328 | 0.005025 | 0.071335 | -2.02262  | 1.922107111 | 3.026373159 | 2.2808267   | 1.648527164  | 1.662621725  | 0.844913917  |
| ENSMUSG000000102950.11 | Gm37018     | -1.03792 | 0.254242 | -2.63124 | 0.019094 | 0.153707 | -0.50209  | 0.861669169 | 0.925287033 | 0.50504383  | 0.202727411  | -0.522421837 | -0.446825208 |
| ENSMUSG00000014301.12  | Pam16       | -1.03773 | 0.526753 | -2.32037 | 0.035097 | 0.200239 | -3.54849  | 0.776780271 | 1.180544089 | 1.01523856  | 1.071717575  | 0.803299224  | -0.91251578  |
| ENSMUSG00000004885.5   | Crabp2      | -1.03741 | 2.458405 | -3.47301 | 0.003485 | 0.058241 | -1.76152  | 2.862257488 | 3.607715344 | 2.426434    | 2.484297768  | 1.824380927  | 1.51535476   |
| ENSMUSG00000027408.7   | Cpxm1       | -1.03665 | 0.892886 | -2.51289 | 0.021423 | 0.170977 | -3.27874  | 0.861669169 | 1.643516065 | 1.56917417  | 1.322026339  | 0.311568212  | -0.350636892 |
| ENSMUSG00000013415.9   | lfg2b1p1    | -1.03661 | 5.239398 | -4.62774 | 0.000343 | 0.017991 | 0.099714  | 5.913538409 | 6.142267521 | 5.20380111  | 5.238047946  | 4.548340811  | 4.390395089  |
| ENSMUSG00000032607.12  | Amt         | -1.03628 | 0.459953 | -2.33809 | 0.033917 | 0.197603 |           |             |             |             |              |              |              |

|                       |              |          |          |          |          |          |          |             |             |             |              |              |              |
|-----------------------|--------------|----------|----------|----------|----------|----------|----------|-------------|-------------|-------------|--------------|--------------|--------------|
| ENSMUSG00000032549.7  | Rab6b        | -1.00285 | 2.30429  | -4.95742 | 0.000181 | 0.012958 | 1.008192 | 2.809201749 | 2.88995396  | 2.71803755  | 1.883905227  | 1.77419517   | 1.750449233  |
| ENSMUSG00000037605.16 | Adgrl3       | -1.00267 | 2.811048 | -3.87545 | 0.001539 | 0.036283 | -1.04458 | 3.383437843 | 3.486790561 | 3.02289134  | 2.54441876   | 2.767797399  | 1.660951082  |
| ENSMUSG00000035835.14 | Pllpr3       | -1.00257 | 3.296988 | -3.70275 | 0.002184 | 0.043943 | -1.46312 | 4.058815639 | 4.288503337 | 3.08270154  | 3.014002333  | 2.925559761  | 3.016265986  |
| ENSMUSG00000066392.11 | Nrxn3        | -1.00207 | 1.493839 | -2.60459 | 0.021013 | 0.157417 | -3.20251 | 1.709666075 | 2.346130154 | 1.93638314  | 0.630148634  | 2.030831804  | 0.309876641  |
| ENSMUSG00000031906.8  | Smpd3        | -1.00204 | 1.233715 | -2.88379 | 0.011523 | 0.115391 | -2.86241 | 1.347095996 | 2.540946331 | 1.39138705  | 0.836599512  | 0.568276051  | 0.17153464   |
| ENSMUSG00000066820.9  | Zfp810       | -1.00148 | 1.399691 | -3.55298 | 0.002962 | 0.053131 | -1.51293 | 1.922110711 | 1.853733772 | 1.87004065  | 1.322026339  | 0.626441549  | 0.803691254  |
| ENSMUSG00000003005.12 | Cdh4         | -0.9997  | 0.424102 | -2.56548 | 0.021649 | 0.162769 | -3.15899 | 0.941839517 | 1.10037374  | 1.00710308  | 0.474029432  | -0.091787482 | -0.260439084 |
| ENSMUSG00000038286.16 | Ank2         | -0.99861 | 4.527594 | -5.07463 | 0.000145 | 0.011551 | 1.01808  | 5.066520807 | 5.411959891 | 4.57178538  | 4.218190528  | 4.209044777  | 3.658062802  |
| ENSMUSG00000028438.16 | Kif24        | -0.99734 | 2.029899 | -4.33521 | 0.000612 | 0.022923 | -0.11046 | 2.47353138  | 2.600447343 | 2.49407271  | 1.787689911  | 1.257796956  | 1.565531157  |
| ENSMUSG00000036006.19 | Ripor2       | -0.99726 | 1.05691  | -2.85215 | 0.011278 | 0.119933 | -2.72594 | 1.709666075 | 1.853733772 | 1.07535956  | 1.07266687   | 0.508605059  | 0.121431351  |
| ENSMUSG00000021589.12 | Rhobtb3      | -0.99717 | 3.31453  | -5.04293 | 0.000154 | 0.011953 | 1.10629  | 3.994480997 | 3.919457955 | 3.4995687   | 3.245613223  | 2.56135621   | 2.666170352  |
| ENSMUSG00000056214.8  | Pard6g       | -0.99688 | 1.339768 | -3.03612 | 0.008471 | 0.097312 | -2.42964 | 1.922210711 | 2.237877264 | 1.34329276  | 1.275483753  | 0.836659257  | 0.423087252  |
| ENSMUSG00000029245.16 | Epha5        | -0.99624 | 2.046208 | -3.70516 | 0.002174 | 0.043866 | -1.2739  | 2.830418235 | 2.446824154 | 2.28082867  | 2.031246943  | 1.583372827  | 1.104557733  |
| ENSMUSG00000025938.16 | Silco5a1     | -0.99595 | 2.267428 | -4.27682 | 0.006687 | 0.024172 | -0.22699 | 2.651249389 | 2.982317978 | 2.62052105  | 2.164925378  | 1.722200532  | 1.463351122  |
| ENSMUSG00000089417.1  | Gm22009      | -0.99577 | 3.313829 | -3.902   | 0.001459 | 0.03514  | -1.07726 | 3.493937384 | 3.732641955 | 4.09364491  | 3.119533475  | 3.280445694  | 2.162772347  |
| ENSMUSG00000097769.7  | Snhg4        | -0.9953  | 0.308297 | -2.42553 | 0.028622 | 0.183246 | -3.37061 | 0.255948108 | 1.462943819 | 0.74605193  | -0.262936162 | -0.091787482 | -0.260439084 |
| ENSMUSG00000036295.4  | Lrrn3        | -0.99518 | 0.752434 | -2.8927  | 0.011318 | 0.113949 | -2.64035 | 1.347095996 | 1.805544089 | 1.29353973  | -0.131691269 | 0.163469573  | 0.672446721  |
| ENSMUSG00000063919.10 | Srrm4        | -0.99471 | 3.070633 | -4.12947 | 0.000922 | 0.028569 | -0.59412 | 3.425873109 | 4.155960666 | 3.15413667  | 2.693474527  | 2.767797399  | 2.562482528  |
| ENSMUSG00000024044.15 | Epb413       | -0.99425 | 2.304152 | -3.65386 | 0.002412 | 0.046328 | -1.39744 | 2.871937504 | 3.354795016 | 2.25065558  | 1.719785847  | 2.009298643  | 1.614030034  |
| ENSMUSG00000032368.14 | Zic1         | -0.99419 | 3.103387 | -3.31801 | 0.004778 | 0.071009 | -2.17603 | 3.324843189 | 3.883980059 | 3.46627426  | 3.405442347  | 2.767797399  | 1.71982394   |
| ENSMUSG00000013367.5  | Igfbp5       | -0.99219 | 0.995807 | -2.62557 | 0.019311 | 0.154133 | -1.03116 | 1.286975003 | 2.120837843 | 1.07535956  | 0.002729842  | 0.884875345  | -0.095379837 |
| ENSMUSG00000075324.13 | Fign         | -0.99194 | 2.65175  | -3.83871 | 0.001658 | 0.03778  | -1.09177 | 3.279280612 | 3.548519551 | 2.64055886  | 2.563914936  | 1.748432074  | 2.129392053  |
| ENSMUSG00000028678.13 | Kif2c        | -0.99178 | 3.121611 | -3.77715 | 0.001878 | 0.040649 | -1.16606 | 2.98973994  | 3.026373159 | 2.37951295  | 2.355973671  | 1.583372827  | 1.540656848  |
| ENSMUSG00000039394.5  | Efnb3        | -0.99109 | 2.006298 | -4.29783 | 0.006526 | 0.023696 | -1.07803 | 2.446631669 | 2.571003565 | 2.4493344   | 1.820479846  | 1.396959730  | 1.35337828   |
| ENSMUSG00000025350.15 | Rdh5         | -0.99086 | -0.2334  | -3.22243 | 0.034957 | 0.200218 | -3.50922 | 1.124037534 | 0.949652679 | 0.81820172  | -0.748362989 | -0.65366637  | -0.175550186 |
| ENSMUSG00000010252.5  | Snrpn        | -0.99082 | 1.177639 | -3.1396  | 0.006868 | 0.087026 | -2.23625 | 0.961204842 | 1.803980737 | 1.29353973  | 0.554199781  | 0.97638401   | 0.576326511  |
| ENSMUSG00000033295.13 | Ptprf        | -0.98906 | 4.98175  | -4.20627 | 0.000791 | 0.026141 | -0.71675 | 5.438018539 | 6.073066394 | 4.91392034  | 4.830575724  | 4.566884705  | 4.068031857  |
| ENSMUSG00000000690.9  | Hoxb6        | -0.98776 | 1.711404 | -2.91446 | 0.10832  | 0.111558 | -2.68897 | 2.271544963 | 2.841455443 | 1.5267389   | 1.573565106  | 1.29386621   | 1.29386621   |
| ENSMUSG00000031112.16 | Stk26        | -0.98728 | 0.436493 | -2.58931 | 0.020748 | 0.158899 | -3.12196 | 0.861669169 | 0.949652679 | 1.34329276  | 0.202727411  | -0.188002798 | -0.095379837 |
| ENSMUSG00000036902.9  | Neto2        | -0.98678 | 1.858897 | -3.09911 | 0.007456 | 0.091098 | -2.37449 | 2.361742772 | 2.414034219 | 2.30613976  | 1.648527164  | 0.508605059  | 1.914835318  |
| ENSMUSG00000075514.4  | Gm13375      | -0.98672 | 2.33447  | -4.11873 | 0.009493 | 0.028746 | -0.52606 | 2.162703915 | 3.090031796 | 2.71803755  | 2.215111335  | 1.919800924  | 1.436633754  |
| ENSMUSG00000025395.14 | Prim1        | -0.98631 | 1.514255 | -2.71878 | 0.16042  | 0.140453 | -3.00815 | 1.961204842 | 2.120837843 | 1.80049971  | 1.787689911  | 1.29386621   | 0.121431352  |
| ENSMUSG00000039081.9  | Zfp503       | -0.98386 | 2.907972 | -4.48805 | 0.000452 | 0.019825 | 0.112272 | 3.397722069 | 3.578421037 | 3.16800884  | 2.90698884   | 2.388644435  | 2.008049752  |
| ENSMUSG00000063455.16 | D630005J12R1 | -0.98364 | 3.28614  | -3.97664 | 0.001255 | 0.032787 | -0.92635 | 3.645275488 | 4.242553751 | 3.42065164  | 3.145646315  | 3.036165249  | 2.226548258  |
| ENSMUSG00000050730.16 | Ahrgap42     | -0.98336 | 1.6768   | -3.02313 | 0.008697 | 0.098507 | -2.4893  | 2.361742772 | 2.199909414 | 1.83568914  | 1.914602024  | 1.220802748  | 0.528056811  |
| ENSMUSG000000100158.1 | Gm28119      | -0.98242 | 1.057769 | -2.44405 | 0.027606 | 0.180155 | -3.33545 | 1.107788371 | 0.614946913 | 0.31863071  | -0.131691269 | -0.522421837 | -0.350636692 |
| ENSMUSG00000024376.6  | Epb414a      | -0.9813  | 1.77049  | -3.07775 | 0.007786 | 0.093204 | -2.40193 | 2.240180792 | 2.865908486 | 1.6894864   | 1.684596418  | 1.257796956  | 0.884991356  |
| ENSMUSG00000029414.11 | Kntc1        | -0.98109 | 3.248283 | -3.73838 | 0.002032 | 0.023111 | -1.38542 | 3.814535193 | 3.486790561 | 3.79585773  | 3.671175903  | 2.469716046  | 1.726723834  |
| ENSMUSG00000022199.10 | Slic22a17    | -0.98086 | 2.634139 | -4.14768 | 0.000889 | 0.042811 | -0.50095 | 3.150238667 | 3.283973678 | 2.92855226  | 2.139162282  | 2.61935212   | 1.683851484  |
| ENSMUSG00000056427.10 | Slit3        | -0.98005 | 1.640706 | -2.91539 | 0.101812 | 0.111434 | -2.67751 | 2.332298994 | 2.739275048 | 1.39138705  | 1.275483753  | 1.228027748  | 0.884991356  |
| ENSMUSG0000003070.6   | Efn2         | -0.97981 | 1.41885  | -3.27061 | 0.005262 | 0.075492 | -2.01891 | 2.027236155 | 2.274871471 | 1.43792963  | 1.017171757  | 0.983906222  | 0.928998488  |
| ENSMUSG00000058070.4  | Em1          | -0.97952 | 2.213882 | -2.97495 | 0.009587 | 0.103779 | -2.65814 | 2.577876203 | 3.04790632  | 2.40316422  | 2.728450708  | 1.062540664  | 1.463351122  |
| ENSMUSG00000014030.15 | Pax5         | -0.9795  | 0.652443 | -2.38907 | 0.030727 | 0.188787 | -3.453   | 0.77680271  | 2.07961518  | 0.671010308 | 0.202727411  | -0.010589673 | 0.170019893  |
| ENSMUSG00000046341.5  | Gm11223      | -0.97928 | 3.65757  | -5.40614 | 7.74E-05 | 0.009615 | 1.737383 | 3.936957296 | 4.618549149 | 3.92417408  | 3.233489664  | 3.057304016  | 3.174947061  |
| ENSMUSG00000055646.6  | Timd4        | -0.97849 | 0.072057 | -2.41766 | 0.29065  | 0.184844 | -3.37208 | 0.487273654 | 0.363408146 | 0.81820172  | -0.407326012 | -0.65366637  | -0.175550186 |
| ENSMUSG00000030519.14 | Apa2         | -0.97653 | 1.552849 | -3.48462 | 0.030404 | 0.057409 | -1.64219 | 2.107425583 | 2.414034219 | 1.65047427  | 1.126106129  | 1.020105398  | 0.998947545  |
| ENSMUSG00000015053.14 | Gata2        | -0.97645 | 0.78199  | -2.85386 | 0.121238 | 0.119766 | -2.70632 | 1.089388156 | 1.643516065 | 1.13307505  | 0.298942726  | -0.010589673 | 0.50856811   |
| ENSMUSG00000052512.15 | Nav2         | -0.97631 | 4.0874   | -4.37595 | 0.000564 | 0.021686 | -0.27801 | 4.555753392 | 5.178105043 | 4.04936435  | 3.489404658  | 3.845799911  | 3.405973231  |
| ENSMUSG00000074519.11 | Zfp971       | -0.97564 | 0.534978 | -2.57715 | 0.212153 | 0.160616 | -1.1462  | 0.941839517 | 0.614946913 | 1.48301752  | -0.262936162 | 0.115168212  | 0.121431352  |
| ENSMUSG00000029814.10 | Igf2bp3      | -0.97498 | 3.53266  | -4.77129 | 0.000259 | 0.015528 | 0.568245 | 4.204061366 | 3.96544416  | 3.81379654  | 3.587920399  | 2.992935197  | 2.631807736  |
| ENSMUSG00000061887.14 | Snb3         | -0.97476 | 4.681265 | -6.37739 | 1.35E-05 | 0.005171 | 3.373274 | 5.054515052 | 5.557930115 | 4.93191611  | 4.301848457  | 4.141368281  | 4.117078698  |
| ENSMUSG00000026558.13 | Uck2         | -0.97467 | 3.492411 | -3.76967 | 0.001907 | 0.041006 | -1.36921 | 3.97560135  | 4.552291305 | 3.40901694  | 3.519672098  | 2.842759456  | 2.655168729  |
| ENSMUSG000000106457.1 | Gm42585      | -0.97399 | 0.474088 | -2.18641 | 0.053496 | 0.216675 | -3.74672 | 0.484773654 | 1.180544089 | 1.07535956  | 0.702229842  | 0.911251578  | 0.911251578  |
| ENSMUSG00000048027.7  | Rgmb         | -0.97347 | 3.707674 | -5.45716 | 7.04E-05 | 0.009244 | 1.824961 | 4.187713372 | 4.5063661   | 3.91597693  | 3.405442347  | 2.902383439  | 3.328161994  |
| ENSMUSG00000054555.11 | Adam12       | -0.9727  | 0.351815 | -2.26969 | 0.036868 | 0.206683 | -3.61033 | 0.861669169 | 1.10037374  | 0.50504383  | 0.70229842   | -0.98056279  | -0.260439084 |
| ENSMUSG00000020493.8  | Prr1         | -0.97261 | 1.705453 | -3.46725 | 0.003526 | 0.058645 | -1.68436 | 2.027236155 | 2.120837843 | 2.28082867  | 1.611532956  | 1.429749638  | 0.17753461   |
| ENSMUSG00000047181.12 | Samd14       | -0.97206 | 2.527702 | -4.01601 | 0.001159 | 0.03138  | -0.7434  | 3.199991702 | 3.486790561 | 2.57959077  | 2.031246943  | 1.896530713  | 2.242061257  |
| ENSMUSG00000030428.16 | Tyh1         | -0.97184 | 1.114545 | -2.34499 | 0.033468 | 0.196453 | -3.57993 | 1.513745865 | 1.993458536 | 1.18857017  | 1.010835606  | 0.931296131  | -0.250636692 |
| ENSMUSG00000030029.14 | Lrig1        | -0.97108 | 3.271272 | -4.22441 | 0.000763 | 0.025525 | -0.33162 | 2.912925242 | 3.004513725 | 2.62052105  | 2.215111335  | 1.965243463  | 1.515354576  |
| ENSMUSG00000037169.14 | Mycn         | -0.97108 | 2.133649 | -3.26759 | 0.005295 | 0.075533 | -2.10127 | 2.743613407 | 3.090031796 | 2.03050532  | 2.164925378  | 1.363407114  | 1.409412315  |
| ENSMUSG00000029376.8  | Mthfd2l      | -0.97017 | 1.732286 |          |          |          |          |             |             |             |              |              |              |

|                        |               |          |          |          |          |          |           |             |             |            |              |              |              |
|------------------------|---------------|----------|----------|----------|----------|----------|-----------|-------------|-------------|------------|--------------|--------------|--------------|
| ENSMUSG00000055717.13  | Slain1        | -0.93958 | 0.59553  | -2.58081 | 0.0211   | 0.159786 | -3.1439   | 1.404811494 | 1.180544089 | 0.67010308 | 0.099633918  | -0.091787482 | 0.309876641  |
| ENSMUSG00000020808.3   | Pirmeg        | -0.93913 | 1.379173 | -3.07598 | 0.007814 | 0.093372 | -2.36271  | 1.798475342 | 2.274871471 | 1.48301752 | 1.275483753  | 0.681936662  | 0.761255988  |
| ENSMUSG00000032875.7   | Arhgef17      | -0.93829 | 3.401756 | -4.37826 | 0.00561  | 0.21658  | -0.16578  | 3.994480997 | 4.042553086 | 3.53211207 | 3.499564524  | 2.62715396   | 2.666710351  |
| ENSMUSG00000048915.12  | Efnas5        | -0.93818 | 2.53983  | -3.62159 | 0.002576 | 0.048607 | -1.49133  | 2.951554672 | 3.139818877 | 2.69905445 | 2.71106863   | 1.896530713  | 1.660951082  |
| ENSMUSG00000011821.11  | Hist1h2bl     | -0.93809 | 2.337452 | -2.64511 | 0.018576 | 0.152181 | -2.28367  | 2.871937504 | 3.438696273 | 2.17489523 | 2.400028851  | 0.97638402   | 1.216772347  |
| ENSMUSG00000027784.10  | Ppm11         | -0.93777 | 2.649743 | -4.87787 | 0.002211 | 0.014141 | -0.857626 | 3.232232039 | 3.04790632  | 3.03807854 | 2.442778498  | 2.09356756   | 2.043894951  |
| ENSMUSG00000041073.10  | Nacad         | -0.93761 | 1.284783 | -2.52282 | 0.023656 | 0.169529 | -3.1018   | 1.615029201 | 2.571003565 | 1.13307505 | 0.965294266  | 1.062540664  | 0.367592139  |
| ENSMUSG00000046546.3   | Fam403a       | -0.93748 | 0.872892 | -2.95556 | 0.020494 | 0.158008 | -3.14102  | 1.224329248 | 1.803980737 | 1.13307505 | -0.011397395 | 0.163469573  | 0.923985488  |
| ENSMUSG00000037172.13  | En30000707Rii | -0.93703 | 2.133052 | -3.91334 | 0.001426 | 0.034672 | -0.89939  | 2.851372724 | 2.540946331 | 3.27951295 | 2.031246943  | 1.42749638   | 1.565351157  |
| ENSMUSG00000042489.15  | Clspn         | -0.93549 | 2.426913 | -3.02667 | 0.008635 | 0.098298 | -2.60031  | 2.970790891 | 2.913605228 | 2.66032006 | 2.922175243  | 1.799506258  | 1.295079639  |
| ENSMUSG00000064168.4   | #N/A          | -0.9337  | 1.9607   | -2.84082 | 0.012563 | 0.218989 | -2.86021  | 2.552565114 | 3.004513725 | 1.76443046 | 2.002957898  | 0.97638402   | 1.463351122  |
| ENSMUSG00000020811.16  | Wscd1         | -0.93323 | 1.422862 | -3.23439 | 0.005665 | 0.078512 | -2.08428  | 1.754753965 | 1.752450437 | 2.06056255 | 1.367114228  | 0.97638402   | 0.625904135  |
| ENSMUSG000000106847.1  | Peg13         | -0.93283 | 2.862774 | -4.57346 | 0.000382 | 0.018298 | -0.277911 | 3.098708366 | 3.664577681 | 3.20884256 | 2.71106863   | 2.266899163  | 2.226548258  |
| ENSMUSG00000039713.16  | Plekhs5       | -0.9325  | 1.143673 | -2.59516 | 0.02051  | 0.158008 | -3.17084  | 1.089938156 | 1.803980737 | 1.83568914 | 1.017171757  | 1.062540664  | 0.052718802  |
| ENSMUSG00000025092.6   | Hspa12a       | -0.93129 | 1.604179 | -2.57881 | 0.021184 | 0.160328 | -3.26462  | 1.565276166 | 3.04790632  | 1.6894684  | 1.322026339  | 0.735375921  | 1.265022405  |
| ENSMUSG00000068748.7   | Ptprz1        | -0.93124 | 2.148442 | -2.82118 | 0.013069 | 0.124906 | -2.92885  | 2.698170436 | 2.95977541  | 2.11886119 | 2.263609653  | 1.965243463  | 0.884991356  |
| ENSMUSG00000032340.7   | Neo1          | -0.92983 | 1.071276 | -4.86814 | 0.002215 | 0.014141 | 0.672602  | 4.624169855 | 4.709182893 | 3.43023296 | 4.006524513  | 3.821294947  | 3.142250023  |
| ENSMUSG00000009681.9   | Bcr           | -0.9291  | 3.280802 | -3.45626 | 0.003606 | 0.059306 | -1.94276  | 3.72234701  | 4.359108008 | 3.1117014  | 3.233489664  | 2.754916107  | 2.443359647  |
| ENSMUSG00000031119.4   | Gpc4          | -0.92907 | 1.07713  | -2.72989 | 0.01569  | 0.138972 | -2.93594  | 1.089938156 | 2.160915282 | 1.39138705 | 0.770111107  | 0.681936662  | 0.367592139  |
| ENSMUSG00000028545.3   | Bend5         | -0.9284  | 0.263964 | -2.47361 | 0.026056 | 0.176497 | -3.2948   | 0.77680271  | 0.725978225 | 0.67010308 | -0.011397395 | -0.402127603 | -0.175550186 |
| ENSMUSG00000042763.9   | Maneal        | -0.9279  | 0.388004 | -2.20792 | 0.043531 | 0.213843 | -3.70604  | 1.158650906 | 0.925287033 | 1.04184602 | 0.70229842   | -0.522421837 | -0.350636892 |
| ENSMUSG00000044060.17  | #N/A          | -0.92761 | 0.634048 | -2.60686 | 0.02004  | 0.157078 | -3.10454  | 0.941839517 | 0.925287033 | 1.34329276 | 0.389140535  | 0.380280962  | -0.175550186 |
| ENSMUSG00000024968.13  | Rcor2         | -0.9242  | 4.103806 | -4.37859 | 0.000561 | 0.021658 | -0.27611  | 4.706800741 | 4.809983807 | 4.09364491 | 4.006524513  | 3.712293242  | 3.222643803  |
| ENSMUSG00000032394.5   | lgdc3c        | -0.92413 | 3.683224 | -3.21548 | 0.005887 | 0.080014 | -2.49679  | 4.648265531 | 4.010009712 | 3.68465139 | 4.096290474  | 2.830533154  | 2.850959311  |
| ENSMUSG00000028414.16  | Fktn          | -0.92378 | 2.203887 | -4.26802 | 0.006699 | 0.024305 | -0.23987  | 2.602750871 | 2.685336241 | 2.67981823 | 2.002957898  | 1.523871816  | 1.728589799  |
| ENSMUSG00000027792.11  | Bche          | -0.92226 | 0.294149 | -2.23681 | 0.041199 | 0.210715 | -3.65478  | 0.487273654 | 1.256492942 | 0.50504833 | 0.389140535  | -0.522421837 | -0.350636892 |
| ENSMUSG000000999250.1  | 1500004A13R   | -0.92221 | 0.204593 | -3.3063  | 0.004894 | 0.073231 | -0.20186  | 2.651249389 | 2.160915282 | 2.62052105 | 2.263609653  | 1.143840766  | 1.489582663  |
| ENSMUSG00000099250.1   | RntS2         | -0.92196 | 3.27803  | -2.907   | 0.010996 | 0.112128 | -2.8043   | 2.721070838 | 3.110642075 | 2.47187697 | 2.239564179  | 2.38846435   | 1.0350168    |
| ENSMUSG00000026779.6   | Mast1         | -0.92184 | 1.670725 | -2.93519 | 0.010389 | 0.108772 | -2.64692  | 2.07236155  | 2.03719913  | 1.4715024  | 2.086213402  | 0.836659257  | 0.849413917  |
| ENSMUSG00000030346.16  | Wsd1ap1       | -0.92174 | 1.249098 | -2.98931 | 0.009313 | 0.101934 | -2.50433  | 2.175329648 | 1.462943819 | 1.48301752 | 0.770111107  | 0.97638402   | 0.625904135  |
| ENSMUSG00000027326.13  | Kn11          | -0.92172 | 2.649882 | -3.20605 | 0.006001 | 0.080764 | -3.20287  | 3.150238667 | 3.02007601  | 2.79156659 | 3.092932665  | 1.748432074  | 1.814701787  |
| ENSMUSG00000050503.8   | Fbx12         | -0.92125 | 0.699416 | -2.65265 | 0.0183   | 0.159392 | -3.0342   | 1.286975003 | 1.10037374  | 1.07535959 | 0.554199781  | -0.88022079  | 0.367592139  |
| ENSMUSG00000024304.14  | Cdh2          | -0.91929 | 4.051201 | -5.01328 | 0.000163 | 0.012385 | 0.956556  | 4.542957786 | 4.794457963 | 4.17832613 | 4.006524513  | 3.39280806   | 3.392134323  |
| ENSMUSG000000061393.13 | Acrv2b        | -0.91921 | 2.64574  | -3.63505 | 0.002506 | 0.047638 | -1.48156  | 3.232232039 | 3.422301835 | 2.6405588  | 2.69347457   | 2.030831804  | 1.850508134  |
| ENSMUSG00000037989.15  | Wnk2          | -0.91912 | 2.596082 | -3.26538 | 0.005319 | 0.075683 | -2.17972  | 2.997773994 | 3.745877783 | 2.49407271 | 2.164925378  | 2.388644435  | 1.79319888   |
| ENSMUSG00000056602.11  | Fry           | -0.919   | 2.109657 | -3.0353  | 0.008486 | 0.097322 | -2.52888  | 2.240180792 | 3.319818877 | 2.25065558 | 1.275483753  | 0.25204829   | 1.51534576   |
| ENSMUSG00000022856.8   | Trmem41a      | -0.91783 | 0.856132 | -2.58265 | 0.021024 | 0.159356 | -3.16091  | 1.374595996 | 1.525679575 | 1.13307505 | 0.474029432  | -0.18802798  | 0.849413917  |
| ENSMUSG00000003779.15  | Klf20a        | -0.91636 | 2.50886  | -3.47743 | 0.003454 | 0.058008 | -1.76179  | 2.80201749  | 3.026373159 | 2.9604956  | 2.844592302  | 1.640516735  | 1.771982394  |
| ENSMUSG00000027167.11  | Elp4          | -0.91613 | 1.318471 | -3.27886 | 0.005175 | 0.074585 | -1.99839  | 1.922121071 | 1.803980737 | 1.61039683 | 0.836599512  | 0.10210359   | 0.17153461   |
| ENSMUSG00000038916.6   | Soga3         | -0.91592 | 2.561585 | -3.55046 | 0.002977 | 0.052362 | -1.63046  | 3.008510557 | 3.405718951 | 2.62052105 | 2.675663294  | 1.824380927  | 1.84718415   |
| ENSMUSG00000029563.16  | Foxp2         | -0.91592 | 2.912948 | -4.05188 | 0.001078 | 0.030547 | -0.7207   | 3.369010772 | 3.47093661  | 3.20884256 | 2.812351965  | 2.702209057  | 1.914335318  |
| ENSMUSG00000007080.14  | Pole          | -0.91572 | 3.394225 | -4.55764 | 0.000394 | 0.018566 | -0.18032  | 3.877044395 | 3.84760767  | 3.75066856 | 3.416208778  | 3.003864757  | 4.069938057  |
| ENSMUSG00000071847.12  | Apccd1        | -0.91527 | 2.154282 | -2.93505 | 0.010392 | 0.108772 | -2.72139  | 2.500570476 | 3.170763068 | 2.17489523 | 2.3105307    | 1.062540664  | 1.746953483  |
| ENSMUSG00000036834.16  | P1ch1         | -0.91519 | 2.127282 | -3.50107 | 0.003292 | 0.056198 | -1.66421  | 2.721070838 | 2.346130154 | 2.5795907  | 2.3105307    | 1.396959703  | 1.409412315  |
| ENSMUSG00000074024.5   | 463247213Ri   | -0.91512 | 2.831294 | -3.21398 | 0.005905 | 0.080014 | -2.32246  | 3.425873109 | 3.09031796  | 3.19535933 | 3.29313647   | 2.21140405   | 1.771982394  |
| ENSMUSG00000078919.10  | Dpm1          | -0.91489 | 1.231826 | -3.01505 | 0.008841 | 0.099056 | -2.45782  | 1.663123489 | 1.948370647 | 1.5267389  | 0.70229842   | 4.445869304  | 1.104557733  |
| ENSMUSG00000031398.13  | P1xna3        | -0.91445 | 3.662985 | -3.05162 | 0.00821  | 0.095879 | -2.81095  | 4.146014081 | 4.529511436 | 3.66522086 | 3.372652412  | 3.878557144  | 2.388653755  |
| ENSMUSG000000294515.1  | Pitnmn2       | -0.91398 | 1.821082 | -3.04534 | 0.008315 | 0.096751 | -2.46803  | 2.175329648 | 2.600447343 | 2.30305532 | 1.534570974  | 1.824380927  | 0.761255988  |
| ENSMUSG00000095123.1   | Gpr12781      | -0.91397 | 1.320248 | -3.18102 | 0.006314 | 0.08304  | -2.17211  | 1.615029201 | 1.901828061 | 1.76443046 | 1.17763646   | 0.848573545  | 0.577809846  |
| ENSMUSG00000048332.13  | Lhfp          | -0.91348 | 0.69275  | -2.46929 | 0.026277 | 0.176849 | -3.32978  | 1.224329248 | 1.643516065 | 0.67010308 | -0.011397395 | 0.80605059   | 0.121431552  |
| ENSMUSG00000006800.13  | Sulf2         | -0.91312 | 4.298652 | -4.39118 | 0.00547  | 0.021597 | -2.78688  | 4.811870936 | 5.308712625 | 4.20548355 | 3.775198967  | 3.745179096  | 3.945465213  |
| ENSMUSG00000041633.14  | Kctd12b       | -0.91268 | 0.747573 | -2.34824 | 0.033258 | 0.196152 | -3.52749  | 1.798475342 | 0.61496913  | 1.13307505 | 0.298942726  | 0.735375921  | -0.095379837 |
| ENSMUSG00000029122.11  | Evc           | -0.91196 | 2.425759 | -3.01604 | 0.008823 | 0.099056 | -2.62003  | 3.183597264 | 2.510249534 | 2.79156659 | 2.779374466  | 1.965243463  | 1.324523417  |
| ENSMUSG00000014932.15  | Yes1          | -0.91095 | 1.511488 | -2.53759 | 0.022978 | 0.167019 | -3.32112  | 1.798475342 | 1.901828061 | 2.03050532 | 1.787689911  | 1.363407143  | 0.187019893  |
| ENSMUSG00000033995.17  | Test2         | -0.91094 | 0.421521 | -2.499   | 0.02479  | 0.172857 | -3.26335  | 0.861669169 | 0.61496913  | 1.13307505 | -0.131691229 | 0.105089673  | 0.025718802  |
| ENSMUSG00000042363.14  | Lgals1        | -0.90977 | 1.069049 | -2.64715 | 0.018501 | 0.152003 | -0.07486  | 1.615029201 | 1.948370647 | 1.01523856 | 0.95945626   | 0.626441549  | 0.249755649  |
| ENSMUSG00000039835.15  | Nhs1          | -0.90928 | 2.889527 | -3.79327 | 0.001818 | 0.039791 | -1.21565  | 3.216201929 | 3.883980059 | 2.94446549 | 2.71106863   | 2.485397668  | 2.096046233  |
| ENSMUSG00000032783.8   | Troap         | -0.9091  | 1.045983 | -2.35156 | 0.033045 | 0.193344 | -3.55951  | 1.798475342 | 1.585800567 | 1.07535959 | 0.77101117   | 1.220802748  | 1.175550186  |
| ENSMUSG00000028246.13  | Facc          | -0.90894 | 2.602836 | -3.5412  | 0.003033 | 0.05369  | -1.6545   | 2.892257488 | 3.622142414 | 2.67981823 | 2.54441876   | 1.799506258  | 2.07887109   |
| ENSMUSG00000041911.3   | Dlx1          | -0.90789 | 1.394652 | -2.59969 | 0.020327 | 0.158008 | -1.9666   | 1.754753965 | 2.237877264 | 1.5267389  | 1.684596418  | 0.239418426  | 0.923985488  |
| ENSMUSG00000021356.9   | Irf4          | -0.90769 | 0.541057 | -2.42852 | 0.028456 | 0.182618 |           |             |             |            |              |              |              |

|                        |              |          |          |          |          |          |          |             |             |             |              |              |              |
|------------------------|--------------|----------|----------|----------|----------|----------|----------|-------------|-------------|-------------|--------------|--------------|--------------|
| ENSMUSG00000043587.15  | Pxylp1       | -0.88097 | 0.697719 | -2.23391 | 0.041429 | 0.211469 | -3.6995  | 1.158650906 | 1.803980737 | 0.58993273  | 0.099633918  | -0.091787482 | 0.625904135  |
| ENSMUSG00000036334.12  | lgsf10       | -0.88091 | 1.289834 | -2.36391 | 0.032264 | 0.193369 | -3.57588 | 1.798475342 | 2.571003565 | 0.95250281  | 0.77101117   | 0.884753545  | 0.761255988  |
| ENSMUSG00000022098.9   | Bmp1         | -0.87957 | 3.176557 | -5.46172 | 6.98E-05 | 0.009244 | 1.881593 | 3.584135193 | 3.678449855 | 3.56393572  | 2.90698884   | 2.741918767  | 0.258391006  |
| ENSMUSG00000037007.13  | Zfp113       | -0.87923 | 1.959162 | -3.226   | 0.005762 | 0.072222 | -1.5526  | 2.55265114  | 2.160915282 | 2.37951295  | 1.914602024  | 1.748432074  | 0.908947545  |
| ENSMUSG000000187143.9  | A830082K12R1 | -0.87896 | 1.612199 | -2.47557 | 0.025956 | 0.176177 | -4.4408  | 1.882133271 | 2.07961518  | 2.3050532   | 1.974103035  | 3.196959703  | 0.398976641  |
| ENSMUSG000000102748.11 | Pcdhgb2      | -0.87855 | 0.666679 | -2.16027 | 0.047647 | 0.21983  | -3.80755 | 0.590367147 | 1.699011178 | 0.95250281  | 0.899335266  | 0.083299224  | -0.260439084 |
| ENSMUSG00000024548.11  | Setpb1       | -0.87855 | 4.126445 | -3.37463 | 0.004258 | 0.065754 | -2.26876 | 4.510463281 | 4.781662358 | 4.48824727  | 3.653085464  | 4.439845516  | 2.958185644  |
| ENSMUSG00000071252.5   | 2210408121R1 | -0.8782  | 0.892248 | -2.64325 | 0.018645 | 0.152283 | -0.06436 | 1.089938156 | 1.643516065 | 1.24200942  | 0.630148634  | 0.626441549  | 0.121433522  |
| ENSMUSG00000032782.19  | Cntrob       | -0.8779  | 2.471098 | -3.10287 | 0.007399 | 0.090735 | -2.46549 | 2.809201749 | 3.170763068 | 2.66032006  | 2.71106863   | 2.09356756   | 1.381667324  |
| ENSMUSG000000104882.11 | Gm43096      | -0.87789 | 0.159695 | -2.1533  | 0.048279 | 0.220594 | -3.76615 | 0.861669169 | 0.94662679  | 0.50504389  | -0.567790743 | -0.522421837 | 0.180178993  |
| ENSMUSG00000031790.7   | Mmp15        | -0.8777  | 1.872591 | -2.75678 | 0.148689 | 0.134268 | -2.99676 | 1.099172692 | 3.170763068 | 1.83568914  | 1.611532956  | 1.29386621   | 1.324523417  |
| ENSMUSG00000035062.13  | Zc4h2        | -0.87716 | 1.502811 | -3.09367 | 0.007539 | 0.091676 | -3.24293 | 2.208119583 | 2.07961518  | 1.56917417  | 1.017171757  | 1.257796956  | 0.884991356  |
| ENSMUSG00000030849.17  | Fgrf2        | -0.87697 | 3.531763 | -4.61352 | 0.000353 | 0.18054  | 0.26689  | 3.994480997 | 4.010009712 | 3.848667    | 3.416208778  | 3.289406562  | 2.631804736  |
| ENSMUSG00000030486.9   | Sv2a         | -0.87602 | 0.556069 | -2.15473 | 0.048149 | 0.220397 | -3.80317 | 0.776780271 | 1.397355478 | 0.81820172  | 0.630148634  | -0.65366637  | 0.367592139  |
| ENSMUSG00000045348.15  | Nyap1        | -0.87529 | 1.475662 | -2.62643 | 0.019278 | 0.154133 | -1.6276  | 1.404811494 | 2.65759125  | 1.6894684   | 1.322026339  | 1.062540664  | 0.71753461   |
| ENSMUSG00000020546.14  | Sixbp4       | -0.87341 | 2.651739 | -3.7337  | 0.002051 | 0.042346 | -1.29364 | 2.932058497 | 3.228478566 | 3.02289214  | 2.76259893   | 2.192420947  | 1.771982394  |
| ENSMUSG00000019773.7   | Fbxo5        | -0.87303 | 1.500241 | -2.88874 | 0.011408 | 0.114674 | -2.70761 | 2.107425583 | 2.037179913 | 1.61039683  | 1.648527164  | 0.836659257  | 0.761255988  |
| ENSMUSG00000023391.8   | Dlx2         | -0.8722  | 0.628193 | -2.29634 | 0.036759 | 0.202822 | -3.59567 | 1.404811494 | 1.180544089 | 0.58993273  | 0.474029432  | 0.380280962  | -0.260439084 |
| ENSMUSG00000032216.14  | Nedd4        | -0.87218 | 6.8132   | -4.83131 | 0.000231 | 0.014822 | 0.48243  | 7.267175363 | 7.58399451  | 6.92366312  | 6.803665622  | 6.26971865   | 0.60565233   |
| ENSMUSG00000005672.12  | Kit          | -0.87149 | 1.677627 | -3.374   | 0.004264 | 0.065762 | -1.85236 | 2.30224176  | 2.274871471 | 1.80049971  | 1.227389465  | 1.257796956  | 1.202961437  |
| ENSMUSG00000032558.18  | Nphp3        | -0.87072 | 1.39733  | -2.68027 | 0.017322 | 0.14661  | -0.05873 | 2.0361669   | 1.803980737 | 1.61039683  | 1.07266687   | 1.493175018  | 0.367592139  |
| ENSMUSG00000025608.9   | Podxl        | -0.8703  | 1.361124 | -3.01872 | 0.008775 | 0.098962 | -4.26261 | 1.460306606 | 1.948370647 | 1.96844435  | 1.07266687   | 0.681936612  | 1.0350168    |
| ENSMUSG00000016200.13  | Syt14        | -0.87025 | 1.21901  | -2.44417 | 0.0276   | 0.180155 | -4.33289 | 1.663123489 | 2.07961518  | 1.24200942  | 1.322026339  | 0.830299224  | 0.923985488  |
| ENSMUSG00000021782.14  | Dlg5         | -0.86904 | 3.743928 | -2.98861 | 0.009326 | 0.101996 | -2.95027 | 4.146014081 | 4.625726752 | 3.71331514  | 3.824606697  | 3.657919181  | 2.496569669  |
| ENSMUSG00000038248.8   | Sobp         | -0.86877 | 1.27738  | -2.42126 | 0.028862 | 0.184162 | -4.79756 | 1.798475342 | 2.380481659 | 1.01523856  | 1.017171757  | 0.97638402   | 0.476526511  |
| ENSMUSG00000031169.13  | Porcn        | -0.86845 | 0.543123 | -2.17579 | 0.042629 | 0.217853 | -3.77005 | 0.941839517 | 1.180544089 | 0.88691447  | -0.567790743 | 0.836659257  | -0.019430984 |
| ENSMUSG00000030436.11  | Dll3         | -0.86814 | 2.291031 | -3.37173 | 0.004283 | 0.065991 | -1.92892 | 2.851327224 | 3.209495462 | 2.2021167   | 1.820479846  | 1.748432074  | 1.914335318  |
| ENSMUSG000000107000.1  | Gm43481      | -0.86681 | 1.115425 | -2.46113 | 0.0267   | 0.177985 | -3.39042 | 1.513745865 | 1.752450437 | 3.0229276   | 1.367114228  | 1.148340766  | 0.17153461   |
| ENSMUSG00000026235.14  | Epha4        | -0.86658 | 3.727229 | -4.0226  | 0.001144 | 0.031368 | -0.91524 | 4.372631088 | 3.871957311 | 4.1295347   | 3.864382698  | 3.315959981  | 2.808980963  |
| ENSMUSG00000025153.9   | Fasn         | -0.86636 | 5.492131 | -4.3845  | 0.005555 | 0.021658 | -0.39146 | 5.888469228 | 6.35371475  | 5.52808407  | 5.505878268  | 4.879796122  | 4.77864162   |
| ENSMUSG00000068699.12  | Finc         | -0.86541 | 3.211041 | -3.09642 | 0.007497 | 0.091373 | -2.44942 | 2.141777088 | 3.283973678 | 2.77353267  | 2.3105307    | 1.695483194  | 1.660951082  |
| ENSMUSG00000027966.19  | Col11a1      | -0.86452 | 2.997315 | -2.63615 | 0.018909 | 0.125876 | -3.44584 | 3.520288711 | 3.607715344 | 3.05310675  | 3.20893256   | 3.003864757  | 1.58998456   |
| ENSMUSG00000029836.15  | Cbx3         | -0.86438 | 2.883457 | -3.99364 | 0.01212  | 0.032203 | -0.82849 | 3.439745284 | 3.486790561 | 2.99203117  | 2.90698884   | 2.248636956  | 2.226548258  |
| ENSMUSG000000088789.1  | Scarna13     | -0.86403 | 1.60006  | -2.55203 | 0.022334 | 0.164957 | -3.10709 | 1.286975003 | 2.739275048 | 2.06056255  | 1.410835606  | 1.257796956  | 0.848913917  |
| ENSMUSG000000104789.1  | Gm38082      | -0.86367 | 0.558065 | -2.49961 | 0.024761 | 0.172784 | -3.27103 | 0.941839517 | 1.180544089 | 0.88691447  | -0.011397395 | 0.163469573  | 0.176019893  |
| ENSMUSG00000027583.13  | Zbtb46       | -0.8635  | 1.429306 | -2.67178 | 0.017617 | 0.148028 | -0.07788 | 1.754753965 | 2.160915282 | 1.61039683  | 1.719785847  | 0.568726051  | 0.761255988  |
| ENSMUSG00000041746.15  | Tet1         | -0.86341 | 2.891236 | -3.43627 | 0.003756 | 0.060796 | -1.90637 | 3.546167343 | 3.265711472 | 3.08270153  | 2.812351965  | 2.805765249  | 1.83471815   |
| ENSMUSG00000013033.14  | Adgr1        | -0.86334 | 0.086819 | -3.79557 | 0.018089 | 0.039736 | -1.42667 | 4.636267997 | 4.482843377 | 4.358499157 | 4.440143438  | 3.197190191  | 3.405973231  |
| ENSMUSG00000022449.16  | Adamts20     | -0.86261 | 1.857429 | -2.66693 | 0.017788 | 0.148904 | -3.15448 | 2.072236155 | 2.199909414 | 2.426434    | 2.378169417  | 1.143840766  | 0.923985488  |
| ENSMUSG00000030313.15  | Dendn5b      | -0.86179 | 2.703842 | -3.75008 | 0.001984 | 0.042194 | -1.26989 | 3.232232039 | 3.405718951 | 2.77353267  | 2.657629371  | 1.896530713  | 2.257409221  |
| ENSMUSG00000052565.6   | Hist1h1d     | -0.86096 | 4.23353  | -3.40693 | 0.003987 | 0.063019 | -2.22283 | 4.671965366 | 4.14364429  | 4.445408754 | 3.342033393  | 3.4364746011 | 1.874746011  |
| ENSMUSG00000049532.10  | Sall2        | -0.85902 | 2.971374 | -3.73791 | 0.002034 | 0.042311 | -1.33656 | 3.480579001 | 3.84760767  | 2.92825526  | 2.745625852  | 2.230140613  | 2.596033605  |
| ENSMUSG00000037725.7   | Ckap2        | -0.85896 | 1.235374 | -3.00304 | 0.009058 | 0.100453 | -4.47929 | 1.663123489 | 1.853733772 | 1.48301752  | 0.95945626   | 0.735375921  | 0.17153461   |
| ENSMUSG00000033849.3   | B3gat2       | -0.85862 | 0.722807 | -2.35405 | 0.032886 | 0.19504  | -3.51569 | 1.347095996 | 1.328642728 | 0.74605193  | 0.77101117   | 0.239418426  | -0.095379837 |
| ENSMUSG00000021965.2   | Ska3         | -0.85726 | 0.971709 | -2.54821 | 0.022503 | 0.165568 | -2.22938 | 1.513745865 | 1.10037374  | 1.48301752  | 1.126106129  | 0.239418426  | 0.367592139  |
| ENSMUSG00000027896.15  | Sic16a4      | -0.85636 | 0.980977 | -2.22492 | 0.042145 | 0.212176 | -3.75184 | 1.709666075 | 1.256492942 | 1.13307505  | 1.494493535  | 0.239418426  | 0.052718802  |
| ENSMUSG00000030319.3   | Cand2        | -0.85634 | 3.179234 | -3.75922 | 0.001948 | 0.04175  | -3.33205 | 3.533286052 | 4.084833889 | 3.2220094   | 3.145646313  | 2.388644436  | 2.700791346  |
| ENSMUSG00000044702.13  | Palb2        | -0.85634 | 1.411344 | -2.9116  | 0.010895 | 0.111729 | -2.65868 | 1.840910608 | 1.752450437 | 1.83568914  | 1.367114228  | 1.148340766  | 0.528056811  |
| ENSMUSG00000051323.16  | Pcdh19       | -0.85626 | 2.023274 | -2.96378 | 0.009806 | 0.100587 | -2.6471  | 1.92210711  | 3.110642075 | 2.35456747  | 1.573565106  | 1.824380927  | 1.35733828   |
| ENSMUSG00000019846.11  | Lama4        | -0.85626 | 1.76365  | -2.58169 | 0.021063 | 0.156899 | -3.28731 | 1.513745865 | 2.95977541  | 2.17489523  | 1.367114228  | 0.97638402   | 1.58998456   |
| ENSMUSG00000022866.15  | Garn13       | -0.85548 | 1.335503 | -2.4704  | 0.02622  | 0.176849 | -4.06999 | 1.663123489 | 1.752450437 | 1.72743629  | 1.820479846  | 0.68193662   | 0.367592139  |
| ENSMUSG00000078716.9   | Tmem87       | -0.85517 | 1.980023 | -3.14492 | 0.006794 | 0.086582 | -3.30762 | 2.526802018 | 2.791269885 | 1.93638314  | 1.852541056  | 1.27796956   | 1.5154576    |
| ENSMUSG000000084911.1  | Gm16B5       | -0.85494 | 0.5237   | -2.21801 | 0.042703 | 0.212429 | -3.70454 | 0.941839517 | 0.925287033 | 0.88691447  | 0.836599512  | -0.00802798  | -0.260439084 |
| ENSMUSG00000051251.3   | Nhlh1        | -0.85459 | 2.369614 | -3.15446 | 0.006664 | 0.085817 | -2.3505  | 2.55265114  | 3.438696273 | 2.4493344   | 2.215111335  | 1.55392905   | 2.008049752  |
| ENSMUSG00000071226.11  | Cecr2        | -0.85418 | 3.778052 | -3.05376 | 0.008174 | 0.095707 | -2.83161 | 4.422384123 | 3.919457955 | 4.14364429  | 3.94837276   | 3.725505677  | 2.508947988  |
| ENSMUSG00000030499.9   | Kctd15       | -0.8539  | 2.272338 | -3.30272 | 0.004929 | 0.07261  | -0.05638 | 2.651249389 | 3.069122806 | 2.35546747  | 2.355973671  | 1.61222769   | 1.58998456   |
| ENSMUSG00000001036.17  | Epn2         | -0.85308 | 1.886364 | -3.00525 | 0.009017 | 0.100253 | -2.55044 | 4.148866679 | 2.685366241 | 1.83568914  | 1.754137352  | 1.55392905   | 1.070206228  |
| ENSMUSG00000054115.1   | Skip2        | -0.85277 | 2.970502 | -4.13251 | 0.009917 | 0.028546 | -0.57414 | 3.210238667 | 3.692189912 | 3.33716696  | 2.891640875  | 2.192420947  | 2.559352942  |
| ENSMUSG00000039601.5   | Rcan2        | -0.85265 | 1.38033  | -3.01611 | 0.008822 | 0.099056 | -2.469   | 1.651029201 | 2.160915282 | 1.6894684   | 0.95945626   | 0.789060222  | 1.070206228  |
| ENSMUSG00000057028.11  | Prdm11       | -0.85226 | 2.05647  | -3.42314 | 0.003858 | 0.06192  | -1.82048 | 2.577876203 | 2.600447343 | 2.66032206  | 2.287260921  | 1.29386621   | 0.810410787  |
| ENSMUSG00000021071.15  | Trim9        | -0.85076 | 1.315635 | -3.01964 | 0.008759 | 0.098935 | -2.      |             |             |             |              |              |              |

|                       |              |          |          |          |          |          |           |             |             |             |             |              |              |
|-----------------------|--------------|----------|----------|----------|----------|----------|-----------|-------------|-------------|-------------|-------------|--------------|--------------|
| ENSMUSG00000026383.14 | Epb41I5      | -0.81812 | 2.366039 | -3.38268 | 0.004189 | 0.06521  | -1.91983  | 2.602750871 | 3.026373159 | 2.6405588   | 2.463687488 | 1.848833971  | 1.614030034  |
| ENSMUSG00000045751.16 | Mms22I       | -0.81677 | 2.74466  | -5.53305 | 0.003084 | 0.054102 | -1.69391  | 2.932058497 | 3.026373159 | 3.38546221  | 2.9068988   | 2.173184728  | 2.043894951  |
| ENSMUSG00000002416.23 | Ndrb2I       | -0.81646 | 1.159521 | -2.22023 | 0.042523 | 0.212347 | -3.78724  | 1.017788371 | 1.462943819 | 1.29353973  | 0.298942726 | 1.75796956   | 0.71753461   |
| ENSMUSG00000030309.16 | Caprin2      | -0.81625 | 1.709979 | -2.34634 | 0.003338 | 0.196286 | -6.8078   | 1.92210711  | 2.160915282 | 2.17489523  | 1.494493531 | 2.030831804  | 0.476526511  |
| ENSMUSG0000005125.12  | Gfc2c        | -0.81614 | 1.91465  | -3.33906 | 0.004578 | 0.069179 | -1.94078  | 1.240180792 | 2.237877264 | 2.4493344   | 1.787689911 | 1.51898456   |              |
| ENSMUSG00000026490.17 | Cdc42bpa     | -0.81602 | 3.392738 | -4.00834 | 0.001177 | 0.031511 | -0.88391  | 3.803848514 | 3.895903227 | 3.64552305  | 3.56874809  | 2.633496307  | 2.808908963  |
| ENSMUSG00000054074.9  | Skiad1       | -0.81563 | 2.522621 | -2.67688 | 0.017439 | 0.147179 | -3.26553  | 1.989773994 | 3.319818877 | 2.4493344   | 2.463687488 | 2.531445035  | 1.38167324   |
| ENSMUSG00000096847.1  | Tmem151b     | -0.81499 | 1.387876 | -2.21354 | 0.043068 | 0.21274  | -3.83807  | 1.460306606 | 2.346130154 | 2.5627389   | 1.852541056 | 0.380280962  | 0.761255988  |
| ENSMUSG00000051043.16 | Gprc5c       | -0.81412 | 1.733889 | -2.86505 | 0.011966 | 0.118239 | -2.73434  | 1.798475342 | 1.948370647 | 1.56917417  | 1.57548357  | 0.931296311  | 0.17753461   |
| ENSMUSG0000001504.10  | Irx2         | -0.81357 | 1.531793 | -3.03472 | 0.008495 | 0.097353 | -2.45162  | 1.961204842 | 2.120837843 | 1.72743625  | 1.275483575 | 1.228020748  | 0.884991356  |
| ENSMUSG00000042156.15 | Dzip1        | -0.81199 | 2.843534 | -3.19655 | 0.06118  | 0.081764 | -2.58831  | 3.150238667 | 3.337411293 | 3.16800884  | 2.891640875 | 2.719182917  | 1.71982394   |
| ENSMUSG00000055980.2  | Irs1         | -0.81089 | 2.905909 | -3.68656 | 0.002257 | 0.044897 | -1.42512  | 3.232232039 | 3.517985183 | 3.12598563  | 3.024226515 | 2.405227319  | 2.129795025  |
| ENSMUSG00000027004.3  | Frzb         | -0.81077 | 1.943766 | -2.59718 | 0.020428 | 0.158008 | -3.29318  | 2.627203915 | 2.600447343 | 1.80049971  | 2.190236466 | 1.062540664  | 1.381667324  |
| ENSMUSG00000026953.13 | Sapcd2       | -0.8103  | 0.798908 | -2.24622 | 0.040466 | 0.209437 | -3.69341  | 0.776780271 | 1.462943819 | 1.29353973  | 0.899335267 | 0.380280962  | -0.019430984 |
| ENSMUSG00000095253.4  | Zfp799       | -0.8096  | 2.186027 | -3.42855 | 0.003815 | 0.061537 | -1.80773  | 2.674900657 | 2.739275048 | 2.33101443  | 2.164925378 | 1.640516735  | 1.565531517  |
| ENSMUSG00000005534.9  | Insr         | -0.80901 | 3.745331 | -5.24296 | 0.001005 | 0.010484 | -1.425944 | 4.120403437 | 4.393155489 | 3.94042998  | 3.529621758 | 3.234786977  | 3.25358751   |
| ENSMUSG00000030878.10 | Cdr2         | -0.80897 | 1.75685  | -3.31445 | 0.004813 | 0.071288 | -1.96881  | 2.141777088 | 2.346130154 | 1.99980852  | 1.494493531 | 1.29386621   | 1.265022405  |
| ENSMUSG00000022708.16 | Zbtb20       | -0.80854 | 3.641359 | -3.67126 | 0.002328 | 0.045748 | -1.59237  | 4.179469378 | 4.490726976 | 3.4995687   | 3.529621758 | 2.981922204  | 3.166842012  |
| ENSMUSG00000076431.4  | Sox4         | -0.80845 | 4.188676 | -4.59246 | 0.000368 | 0.01826  | -1.29066  | 4.593473058 | 4.951230301 | 4.23872684  | 3.984991352 | 3.857898053  | 3.505738432  |
| ENSMUSG00000038042.9  | Ptpdc1       | -0.80679 | 1.422031 | -2.55375 | 0.022258 | 0.164654 | -3.2795   | 1.513745865 | 1.993458536 | 1.87004065  | 1.534570974 | 1.143840766  | 0.476526511  |
| ENSMUSG00000036898.16 | Zfp157       | -0.80668 | 2.532026 | -3.18006 | 0.006326 | 0.083061 | -3.33149  | 3.008510557 | 2.816580774 | 2.87850223  | 2.69347537  | 2.248636956  | 1.565531517  |
| ENSMUSG00000054263.11 | Lifr         | -0.80665 | 2.130101 | -2.93941 | 0.010301 | 0.108241 | -2.70967  | 2.0361669   | 3.004513725 | 2.55868179  | 2.058991933 | 1.329055639  | 1.79319888   |
| ENSMUSG00000045515.3  | Pou3f3       | -0.80626 | 4.06364  | -3.97515 | 0.001258 | 0.032787 | -1.06652  | 4.671965366 | 4.544737911 | 4.13660674  | 4.168113655 | 3.62997324   | 3.230442174  |
| ENSMUSG00000027805.16 | Pfn2         | -0.80395 | 2.520373 | -3.52688 | 0.003123 | 0.05441  | -1.66934  | 3.027006901 | 3.265711472 | 2.51593215  | 2.287260921 | 1.896530713  | 2.129795025  |
| ENSMUSG00000038126.17 | Mphosph9     | -0.80274 | 2.156866 | -3.6615  | 0.002375 | 0.046124 | -1.3669   | 2.698170436 | 2.65759125  | 2.33101443  | 1.852541056 | 1.695483194  | 1.706394053  |
| ENSMUSG0000002429.17  | Tead3        | -0.80266 | 1.078683 | -2.46933 | 0.026275 | 0.176849 | -3.37207  | 1.224239248 | 2.037179913 | 1.24200942  | 0.554199876 | 0.836659257  | 0.577808962  |
| ENSMUSG00000024268.15 | Celf4        | -0.80245 | 1.578176 | -2.7359  | 0.015503 | 0.137951 | -2.98758  | 1.798475342 | 2.571003565 | 1.65047427  | 1.17763644  | 0.97638402   | 1.295079639  |
| ENSMUSG00000028933.11 | Xrcc2        | -0.80211 | 1.117486 | -2.23369 | 0.041446 | 0.211469 | -3.75907  | 1.460306606 | 1.525679575 | 1.5267389   | 1.322026339 | -0.091787482 | 0.909513338  |
| ENSMUSG00000020181.15 | Nav3         | -0.80127 | 1.362645 | -2.28438 | 0.037613 | 0.200554 | -3.71887  | 1.565276166 | 2.247841741 | 1.43792963  | 1.126106129 | 1.461810848  | 0.300876641  |
| ENSMUSG00000039781.14 | Cep131       | -0.80082 | 2.657888 | -4.07413 | 0.01031  | 0.045412 | -0.644    | 3.0633003   | 2.936875008 | 3.1117014   | 2.524655505 | 2.302744362  | 2.008490752  |
| ENSMUSG00000046994.9  | Mars2        | -0.8007  | 0.952626 | -2.34724 | 0.033322 | 0.196152 | -5.5396   | 1.76780271  | 1.585800567 | 1.65047427  | 0.77011117  | 0.508605059  | 0.423087252  |
| ENSMUSG00000017667.9  | Zfp334       | -0.80062 | 3.092145 | -3.75728 | 0.004253 | 0.065754 | -2.06236  | 3.263767612 | 3.822839764 | 3.32483586  | 3.281384354 | 2.633496307  | 2.265482528  |
| ENSMUSG00000026586.16 | Prrx1        | -0.80046 | 4.062769 | -4.54374 | 0.000405 | 0.018666 | 0.051967  | 4.593473058 | 4.521837508 | 4.23213918  | 4.122823545 | 3.535216789  | 3.37112383   |
| ENSMUSG0000007590.2   | Nrbp2        | -0.79979 | 0.682834 | -2.3446  | 0.033493 | 0.196453 | -3.52636  | 1.158605096 | 1.015484842 | 1.07535956  | 0.099633918 | 0.626441598  | 0.121431552  |
| ENSMUSG00000040606.13 | Kazn         | -0.79937 | 1.146523 | -2.34316 | 0.033586 | 0.196627 | -3.58787  | 1.286975003 | 2.120837843 | 1.24200942  | 0.899335267 | 1.020105349  | 0.884991352  |
| ENSMUSG00000018849.6  | Wwv1         | -0.79934 | 1.584075 | -2.37842 | 0.031369 | 0.190935 | -3.60326  | 1.882133271 | 2.571003565 | 1.48301752  | 1.648527164 | 1.29386621   | 0.625904135  |
| ENSMUSG00000028930.7  | Lmtk2        | -0.79888 | 3.276423 | -4.48805 | 0.000452 | 0.018625 | -0.063873 | 3.771305141 | 3.784871914 | 3.477458    | 3.106297648 | 2.561346521  | 2.957921643  |
| ENSMUSG00000052105.16 | Mtlc1        | -0.79851 | 3.802096 | -2.86982 | 0.011851 | 0.117456 | -3.19092  | 4.379844578 | 4.376232186 | 3.822529348 | 3.509653342 | 4.080722068  | 2.643534029  |
| ENSMUSG00000051099.13 | Lgr4         | -0.79849 | 3.018765 | -2.66475 | 0.017865 | 0.149363 | -3.9827   | 3.680753383 | 3.20949562  | 3.2220094   | 3.316289969 | 2.890654126  | 1.79319888   |
| ENSMUSG00000027799.12 | Nbea         | -0.79844 | 4.452647 | -3.73799 | 0.002033 | 0.042311 | -1.59656  | 4.811870936 | 5.123375565 | 4.59764082  | 4.324885993 | 4.411397086  | 3.446710856  |
| ENSMUSG00000045071.13 | E130308A19R1 | -0.7982  | 2.969976 | -4.47442 | 0.004464 | 0.020089 | -0.087786 | 3.294628576 | 3.47093661  | 3.31239875  | 2.76259893  | 2.647503165  | 2.331791418  |
| ENSMUSG00000032883.15 | Acs3         | -0.79799 | 2.751803 | -3.48376 | 0.00341  | 0.057409 | -1.7899   | 3.216201929 | 3.283973678 | 2.91816082  | 2.90689884  | 1.965243463  | 2.226548258  |
| ENSMUSG00000026620.11 | Mar1         | -0.79795 | 1.835757 | -2.60604 | 0.020073 | 0.15715  | -3.25787  | 2.418886679 | 2.629302206 | 1.65047427  | 1.883905227 | 1.963995371  | 1.03501168   |
| ENSMUSG00000032589.14 | Bsn          | -0.79794 | 2.676362 | -3.74349 | 0.002011 | 0.042282 | -1.27847  | 3.294628576 | 3.302007601 | 2.69905445  | 2.086213402 | 2.388644435  | 2.287623834  |
| ENSMUSG00000025816.13 | Sec61a2      | -0.79751 | 2.615868 | -2.93618 | 0.010368 | 0.107822 | -2.80601  | 3.24808599  | 3.004513725 | 2.69905445  | 2.844592302 | 2.284933005  | 1.614030034  |
| ENSMUSG0000003378.9   | Grik5        | -0.7969  | 3.235507 | -3.21266 | 0.005921 | 0.080088 | -2.40792  | 3.608903098 | 3.810294511 | 3.40901694  | 3.293133647 | 3.12894189   | 2.162772347  |
| ENSMUSG00000041703.7  | Zic5         | -0.79605 | 1.09788  | -2.26517 | 0.039025 | 0.207621 | -3.70592  | 1.513745865 | 1.853733772 | 1.07535956  | 1.275483575 | 0.681936662  | 0.107919893  |
| ENSMUSG00000044700.15 | Tmem201      | -0.79545 | 2.891355 | -4.11257 | 0.000954 | 0.028907 | -0.60116  | 3.558934639 | 3.388943238 | 2.9604956   | 2.442778498 | 2.500910667  | 2.496065697  |
| ENSMUSG00000069274.3  | Hist1h4f     | -0.79476 | 3.370289 | -2.52237 | 0.023677 | 0.169529 | -3.74254  | 3.985051584 | 4.306481978 | 2.9203117   | 3.689042323 | 2.805765249  | 2.443369647  |
| ENSMUSG00000025932.14 | Eya1         | -0.79443 | 2.443639 | -3.41805 | 0.003898 | 0.062194 | -1.86475  | 3.027006901 | 2.841455443 | 2.60021016  | 2.524655505 | 1.896530713  | 1.771982394  |
| ENSMUSG0000004356.7   | Utp20        | -0.79437 | 3.558963 | -4.68813 | 0.003005 | 0.017041 | -0.05541  | 3.726739589 | 4.074378531 | 4.01907042  | 3.509653342 | 3.057304016  | 2.966629825  |
| ENSMUSG00000004610.4  | Etfb         | -0.79391 | 1.516165 | -2.94379 | 0.01021  | 0.107613 | -2.61201  | 1.663123489 | 1.948370647 | 2.09000633  | 1.17763644  | 1.29386621   | 0.923985488  |
| ENSMUSG00000031004.7  | Mki67        | -0.79356 | 5.750371 | -3.74163 | 0.002018 | 0.042285 | -1.68327  | 6.223237028 | 6.15224298  | 6.05400483  | 6.039104303 | 5.207863692  | 4.82573736   |
| ENSMUSG00000026193.15 | Frn1         | -0.79319 | 5.528044 | -5.29898 | 9.46E-05 | 0.010152 | 1.379514  | 5.878318298 | 6.262261422 | 5.63682286  | 5.182374349 | 5.290522767  | 4.9179617    |
| ENSMUSG00000027201.16 | Myef2        | -0.79193 | 3.631097 | -4.90152 | 0.000202 | 0.01387  | 0.801032  | 3.994480997 | 3.954048298 | 4.07167451  | 3.606841261 | 3.12894189   | 3.303055712  |
| ENSMUSG00000029454.15 | Mapkapk5     | -0.79178 | 1.124401 | -2.17288 | 0.046524 | 0.217853 | -3.85589  | 1.709666075 | 1.752450437 | 1.24200942  | -0.13169129 | 1.329055639  | 0.844913917  |
| ENSMUSG00000029090.12 | Adgr3        | -0.79132 | 3.709979 | -3.69277 | 0.002229 | 0.044692 | -1.56316  | 4.19510525  | 4.315386631 | 3.79857773  | 3.903167129 | 3.189231334  | 2.966629825  |
| ENSMUSG00000028031.6  | Dkk2         | -0.79043 | 1.284314 | -2.3476  | 0.033299 | 0.196152 | -3.60236  | 1.961204842 | 1.180544089 | 1.76443040  | 1.575365106 | 0.508605059  | 0.71753461   |
| ENSMUSG00000020844.6  | Nxn          | -0.78936 | 2.252498 | -2.46427 | 0.026536 | 0.177689 | -3.58834  | 2.800418235 | 3.170763068 | 1.93638314  | 2.421562012 | 1.77419517   | 1.381667324  |
| ENSMUSG00000026622.15 | Nek2         | -0.78768 | 1.687455 | -2.19729 | 0.04442  | 0.214943 | -3.92273  | 1.92210711  | 1.993458536 | 2.14715024  | 2.421562012 | 0.836659257  | 0.836659257  |
| ENSMUSG00000074994.4  | Qser1        | -0.78719 | 3.823857 | -4.88419 | 0.000208 | 0.014125 | 0.741573  |             |             |             |             |              |              |

|                        |          |          |          |          |          |          |          |             |             |            |              |              |             |
|------------------------|----------|----------|----------|----------|----------|----------|----------|-------------|-------------|------------|--------------|--------------|-------------|
| ENSMUSG00000022814.6   | Umps     | -0.75692 | 2.736317 | -4.22843 | 0.000757 | 0.025525 | -0.36006 | 3.183597264 | 3.069122806 | 3.08270153 | 2.463687488  | 2.230140613  | 2.388653755 |
| ENSMUSG00000079560.13  | Hoxa3    | -0.75625 | 0.976836 | -1.13918 | 0.049581 | 0.222531 | -0.88453 | 1.565276166 | 1.462943819 | 1.01523856 | 0.70229842   | 1.062540664  | 0.052718802 |
| ENSMUSG00000038351.14  | Sgsm2    | -0.75605 | 0.025753 | -2.36703 | 0.03207  | 0.19298  | -3.71468 | 2.072236155 | 2.414034219 | 2.66032206 | 2.215111335  | 2.030831804  | 0.923985488 |
| ENSMUSG00000020175.13  | Rab36    | -0.75527 | 0.94998  | -2.26035 | 0.039386 | 0.208097 | -3.69159 | 1.347095996 | 1.699011178 | 1.01523856 | 0.554199781  | 0.239418426  | 0.844913917 |
| ENSMUSG00000060981.6   | Hist1h4h | -0.75492 | 3.575156 | -2.60311 | 0.02019  | 0.157605 | -6.64257 | 3.703929706 | 4.647047756 | 5.52134566 | 3.824526679  | 2.531445065  | 3.284256480 |
| ENSMUSG00000033152.13  | Podx12   | -0.75402 | 1.789241 | -2.70406 | 0.01652  | 0.142834 | -3.077   | 3.232989994 | 2.571003565 | 1.6894684  | 1.17763643   | 1.583372822  | 1.381675324 |
| ENSMUSG00000042807.15  | Hecw2    | -0.75376 | 0.977333 | -2.29947 | 0.036538 | 0.206683 | -6.33353 | 1.224239248 | 1.699011178 | 1.13307505 | 0.77101117   | 0.786960227  | 0.429755649 |
| ENSMUSG00000045136.5   | Tab2b2b  | -0.75293 | 5.048678 | -4.31246 | 0.00064  | 0.023329 | -0.11156 | 3.374437845 | 5.808718656 | 5.09182677 | 4.916499509  | 4.75976008   | 4.34082523  |
| ENSMUSG00000097347.1   | Gm1/2725 | -0.75218 | 1.333778 | -2.62503 | 0.019331 | 0.154133 | -3.14497 | 1.999172692 | 1.328642728 | 1.76443046 | 1.017171757  | 0.931296311  | 0.961953338 |
| ENSMUSG00000048126.1   | Col6a3   | -0.75104 | 2.563424 | -3.46059 | 0.003574 | 0.058949 | -1.80269 | 2.721070838 | 3.88943238  | 2.77353267 | 2.086213420  | 2.093576520  | 2.31718617  |
| ENSMUSG00000018166.8   | Erb3b    | -0.74977 | 2.702317 | -2.61337 | 0.019783 | 0.155703 | -3.42007 | 2.800418235 | 3.919457955 | 3.57346531 | 2.602134258  | 2.21104005   | 2.110391312 |
| ENSMUSG00000047747.9   | Rnf150   | -0.74935 | 2.725074 | -4.11295 | 0.000954 | 0.028907 | -0.57835 | 3.008510557 | 3.283973678 | 3.03807854 | 2.287260921  | 2.302744362  | 2.429876417 |
| ENSMUSG00000048696.10  | Mex3d    | -0.74916 | 3.358192 | -3.98217 | 0.001241 | 0.032515 | -0.92904 | 3.975560135 | 3.907728662 | 3.33716666 | 3.052105547  | 3.078137519  | 2.798454606 |
| ENSMUSG00000027715.9   | Ccna2    | -0.7481  | 2.858371 | -3.46243 | 0.003561 | 0.05885  | -1.84996 | 3.369010772 | 3.170763068 | 3.08270153 | 3.010082333  | 3.354895644  | 2.162772347 |
| ENSMUSG00000040785.17  | Ttc3     | -0.74542 | 5.896324 | -3.81556 | 0.001737 | 0.038885 | -1.53739 | 6.410986291 | 6.24138605  | 6.14977412 | 5.980464536  | 5.672549083  | 4.927282741 |
| ENSMUSG00000026153.15  | Fam135a  | -0.74423 | 3.29728  | -4.01016 | 0.001173 | 0.031531 | -0.86373 | 3.680753383 | 3.692189912 | 3.57439188 | 3.316289969  | 2.948369644  | 2.517683744 |
| ENSMUSG00000022240.9   | Ctndd2   | -0.74375 | 2.176446 | -3.19345 | 0.006156 | 0.081955 | -2.24663 | 2.240180792 | 2.88995396  | 2.53746531 | 1.719785847  | 1.987439209  | 1.683851484 |
| ENSMUSG00000048644.7   | Cttn1    | -0.74366 | 1.698387 | -2.24218 | 0.04078  | 0.209905 | -3.85148 | 2.240180792 | 2.739275048 | 1.34329276 | 1.410835606  | 1.02010398   | 1.436633784 |
| ENSMUSG00000012443.3   | Kif11    | -0.74362 | 3.52288  | -3.18922 | 0.006209 | 0.082254 | -2.51463 | 4.022404999 | 4.053239764 | 3.55340685 | 3.606841261  | 3.342033493  | 2.559352942 |
| ENSMUSG0000001228.14   | Uhrf1    | -0.74347 | 4.224597 | -3.45236 | 0.003635 | 0.059702 | -2.13164 | 4.706800741 | 4.813441066 | 4.23872684 | 4.471450888  | 3.441856241  | 3.675306375 |
| ENSMUSG00000042955.7   | Fam199x  | -0.74204 | 2.254186 | -2.65056 | 0.018376 | 0.151282 | -3.25808 | 2.932058497 | 2.913605228 | 2.70350532 | 2.3103507    | 1.748432074  | 1.58998456  |
| ENSMUSG00000074165.10  | Zfp788   | -0.74198 | 1.511956 | -2.49491 | 0.02499  | 0.17357  | -3.39396 | 2.175329648 | 1.643516065 | 1.76443046 | 1.648527164  | 0.735375921  | 1.104557733 |
| ENSMUSG00000036782.13  | Khl13    | -0.7415  | 1.943807 | -2.92439 | 0.010618 | 0.110192 | -2.70663 | 1.999172692 | 2.685326421 | 2.2808267  | 1.719785847  | 1.29386621   | 1.683851484 |
| ENSMUSG00000006078.4   | Hist1h4c | -0.74079 | 2.580709 | -2.32065 | 0.035078 | 0.200218 | -3.91157 | 2.871937504 | 3.63642664  | 2.33101443 | 2.90689884   | 1.987439209  | 1.750449233 |
| ENSMUSG00000038252.13  | Ncapd2   | -0.74021 | 4.677476 | -3.65294 | 0.002417 | 0.046633 | -1.79424 | 5.139653916 | 5.326441819 | 4.45786664 | 4.785615583  | 4.828691135  | 3.827586335 |
| ENSMUSG00000052516.3   | Robo2    | -0.73921 | 3.107423 | -2.72323 | 0.0159   | 0.139769 | -3.31054 | 3.30981498  | 3.63642664  | 3.60901694 | 3.010082333  | 2.894603662  | 1.989787546 |
| ENSMUSG0000003232.17   | Col12a1  | -0.73853 | 0.043981 | -2.97579 | 0.009571 | 0.103779 | -2.82122 | 2.892257488 | 3.650570823 | 3.61546782 | 3.024226515  | 2.902335923  | 2.17892574  |
| ENSMUSG00000050947.9   | Amigo1   | -0.73848 | 1.446722 | -2.58763 | 0.020818 | 0.158953 | -2.22535 | 2.0361669   | 1.803980737 | 1.65047427 | 1.07266299   | 0.735375921  | 1.381673234 |
| ENSMUSG0000001870.15   | Ltbp1    | -0.73768 | 2.094929 | -2.81738 | 0.013169 | 0.125327 | -2.92655 | 2.674900657 | 2.510249534 | 2.2021167  | 1.684596418  | 1.273184728  | 1.324523417 |
| ENSMUSG00000033705.16  | Star9d   | -0.73677 | 2.575688 | -2.92385 | 0.010629 | 0.110226 | -2.82101 | 3.199997102 | 3.283973678 | 2.37951295 | 2.355973671  | 2.320383439  | 1.424335318 |
| ENSMUSG00000047193.15  | Dync2h1  | -0.73563 | 3.975138 | -3.43842 | 0.003739 | 0.060677 | -2.11588 | 4.220226186 | 4.46694575  | 4.27763333 | 4.027740999  | 3.863909291  | 2.994374816 |
| ENSMUSG00000046591.10  | Ticrr    | -0.73561 | 2.437796 | -2.66372 | 0.017902 | 0.149529 | -3.27169 | 2.871937504 | 3.26373159  | 2.4493344  | 2.67566299   | 1.21388754   | 1.489582663 |
| ENSMUSG00000030683.11  | Sez6l2   | -0.73337 | 0.736836 | -2.13888 | 0.049609 | 0.222531 | -3.8499  | 1.158650906 | 1.328642728 | 0.81820172 | 0.70229842   | 0.163469573  | 0.249755649 |
| ENSMUSG00000038418.7   | Egr1     | -0.73309 | 2.025226 | -3.26037 | 0.005373 | 0.075998 | -2.1255  | 2.577876203 | 2.816580774 | 2.35564747 | 1.684596418  | 2.05240829   | 1.728589799 |
| ENSMUSG00000036768.5   | Kif15    | -0.7327  | 3.276056 | -3.23177 | 0.005695 | 0.07862  | -2.37942 | 3.95687826  | 3.56354776  | 3.33716666 | 3.426895457  | 2.902383439  | 2.464953857 |
| ENSMUSG00000023411.11  | Nfatc4   | -0.73252 | 3.130677 | -2.98432 | 0.009407 | 0.102716 | -2.82398 | 3.771305141 | 3.486790561 | 3.15413667 | 3.383665405  | 2.71556744   | 2.272595625 |
| ENSMUSG00000027699.19  | Ect2     | -0.73176 | 2.695116 | -2.69439 | 0.016841 | 0.14459  | -2.27072 | 3.116090444 | 3.319818877 | 2.67981823 | 2.7964798235 | 2.33777025   | 1.750449233 |
| ENSMUSG00000034557.14  | Zfyve9   | -0.7314  | 2.596949 | -2.90975 | 0.010936 | 0.11185  | -2.85156 | 3.13265588  | 3.04790632  | 2.6405588  | 2.77934664   | 2.230140613  | 1.750449233 |
| ENSMUSG00000036202.15  | Rif1     | -0.73136 | 4.719889 | -3.22207 | 0.005808 | 0.07959  | -2.65641 | 5.065541502 | 4.951230301 | 5.18345724 | 4.838601865  | 4.645759727  | 3.634746011 |
| ENSMUSG00000034813.16  | Grip1    | -0.73133 | 1.876322 | -2.25102 | 0.040096 | 0.208709 | -3.87292 | 2.0361669   | 2.712557709 | 1.93638314 | 1.787689911  | 1.965243463  | 0.803691254 |
| ENSMUSG00000024827.9   | Gld1     | -0.7295  | 1.264753 | -2.32274 | 0.034937 | 0.200218 | -3.63978 | 1.513745865 | 1.803980737 | 1.5267389  | 1.453270782  | 1.4445869304 | 0.844913917 |
| ENSMUSG00000021936.13  | Mapk8    | -0.7293  | 3.66649  | -4.70069 | 0.000298 | 0.016849 | 0.413824 | 4.283132937 | 3.954084298 | 3.848667   | 3.361554703  | 3.39280806   | 3.15869117  |
| ENSMUSG000000339953.13 | C1stn1   | -0.72905 | 3.859304 | -4.45032 | 0.004047 | 0.02053  | -0.09917 | 4.07668206  | 4.490726976 | 4.08635855 | 3.766811182  | 3.497048028  | 3.238198617 |
| ENSMUSG00000068735.13  | Trps5311 | -0.72845 | 4.178481 | -3.65373 | 0.002413 | 0.046328 | -1.72391 | 4.358094995 | 5.045232186 | 4.23872684 | 4.14887377   | 3.47365246   | 3.806302467 |
| ENSMUSG00000051236.13  | Msr3b    | -0.7275  | 1.082758 | -2.16505 | 0.047218 | 0.219095 | -3.86148 | 1.089938156 | 1.643516065 | 1.65047427 | 0.630148634  | 0.311568212  | 1.170902002 |
| ENSMUSG00000081683.5   | Fzd10    | -0.72715 | 2.869147 | -2.83316 | 0.012758 | 0.122723 | -3.05185 | 3.425873109 | 3.283973678 | 2.92825526 | 3.221263362  | 2.009298643  | 2.346218488 |
| ENSMUSG00000048330.1   | Ric3     | -0.72649 | 1.168985 | -2.32077 | 0.03507  | 0.200218 | -3.62765 | 1.089938156 | 1.993458536 | 1.5267389  | 0.899335267  | 0.80690222   | 0.71753461  |
| ENSMUSG00000016933.17  | Plc1g    | -0.72592 | 4.397395 | -3.88973 | 0.01495  | 0.035893 | -1.28655 | 4.93409976  | 4.788074346 | 4.53479117 | 4.230442789  | 4.352759899  | 3.543789738 |
| ENSMUSG00000043015.15  | Nemp2    | -0.72518 | 1.635132 | -2.75719 | 0.014857 | 0.134251 | -2.95874 | 1.961204842 | 2.07961518  | 1.90359321 | 1.648527164  | 1.182834898  | 1.0350168   |
| ENSMUSG00000024298.14  | Zfp871   | -0.72435 | 3.673428 | -4.02165 | 0.001146 | 0.03138  | -0.90766 | 4.007776506 | 4.084832889 | 3.91597693 | 3.509653342  | 3.57240171   | 2.889293652 |
| ENSMUSG00000034949.18  | Zfr2     | -0.72368 | 0.950472 | -2.26669 | 0.038911 | 0.207284 | -3.68169 | 1.404811494 | 1.585800567 | 1.01523856 | 0.389140353  | 0.681936662  | 0.625904135 |
| ENSMUSG000000108621.1  | Gm37494  | -0.72332 | 3.337723 | -3.37763 | 0.004232 | 0.065579 | -2.10844 | 3.71579726  | 3.678449855 | 3.61546782 | 3.634765262  | 2.71556744   | 2.666710351 |
| ENSMUSG00000046709.16  | Mapk10   | -0.7223  | 2.347433 | -3.26911 | 0.005278 | 0.07552  | -2.13141 | 2.71070838  | 3.04790632  | 2.40316422 | 1.944659258  | 2.07295728   | 1.894393142 |
| ENSMUSG00000028476.13  | Reck     | -0.72188 | 2.032236 | -2.181   | 0.045814 | 0.217545 | -4.02282 | 2.698170436 | 2.380481659 | 1.99980852 | 2.287260921  | 1.942700894  | 0.884991356 |
| ENSMUSG00000020492.11  | Ska2     | -0.72164 | 2.296511 | -2.53575 | 0.023062 | 0.167189 | -3.47159 | 2.951554672 | 2.65759125  | 2.2808267  | 2.583151155  | 1.896530713  | 1.409412315 |
| ENSMUSG00000047534.16  | Mis18bp1 | -0.72071 | 2.320147 | -2.28569 | 0.037519 | 0.204554 | -3.91148 | 2.698170436 | 2.65759125  | 2.53746531 | 2.952076729  | 1.722005523  | 1.35337828  |
| ENSMUSG00000020674.16  | Pxdn     | -0.72041 | 4.350528 | -3.21361 | 0.005909 | 0.080014 | -2.62386 | 4.98268457  | 4.922375438 | 4.23872684 | 3.984991352  | 4.455583932  | 3.518534077 |
| ENSMUSG00000020330.16  | Hmnr     | -0.71973 | 1.826671 | -2.20839 | 0.043493 | 0.213784 | -3.93326 | 2.32298994  | 1.803980737 | 2.25506558 | 2.139162282  | 1.668261725  | 0.761255908 |
| ENSMUSG00000052534.15  | Pbx1     | -0.71935 | 4.845453 | -5.36599 | 0.009818 | 0.09818  | -1.53938 | 5.214185583 | 5.391050901 | 5.01331881 | 4.658995978  | 4.264628989  | 4.52963784  |
| ENSMUSG00000024998.17  | Plce1    | -0.71915 | 1.79488  | -2.37012 | 0.031878 | 0.192604 | -3.65711 | 2.271544963 | 2.07961518  | 1.99980852 | 2.031246943  | 1.583372827  | 0.803691254 |
| ENSMUSG00000019841.15  | Rev3l    | -0.7183  | 4.173397 | -3.12071 | 0.007136 | 0.089222 |          |             |             |            |              |              |             |

|                        |             |          |          |          |          |          |          |             |             |            |             |             |              |
|------------------------|-------------|----------|----------|----------|----------|----------|----------|-------------|-------------|------------|-------------|-------------|--------------|
| ENSMUSG00000033948.3   | Zswim5      | -0.68866 | 2.469885 | -2.89893 | 0.011177 | 0.113194 | -2.84653 | 2.698170436 | 3.170763068 | 2.55868179 | 2.378169417 | 2.284933085 | 1.728589799  |
| ENSMUSG00000018451.6   | 6330403K07R | -0.68857 | 1.938502 | -2.30114 | 0.036421 | 0.202683 | -3.80205 | 2.526802018 | 2.478885363 | 1.80049971 | 1.974103035 | 1.799506258 | 1.0350168    |
| ENSMUSG00000025026.14  | Add3        | -0.68763 | 2.266888 | -2.87906 | 0.011633 | 0.116063 | -2.84488 | 2.892257488 | 2.791269685 | 2.2021167  | 1.787689911 | 2.113887544 | 1.81410787   |
| ENSMUSG00000006141.12  | NoI4        | -0.68695 | 3.009125 | -2.85974 | 0.012094 | 0.119071 | -0.03296 | 3.425873109 | 3.942634277 | 2.77353267 | 2.171068663 | 2.546473245 | 2.655168729  |
| ENSMUSG00000033858.7   | Akap12      | -0.6864  | 3.420045 | -3.8124  | 0.001749 | 0.038925 | -1.27275 | 3.596572296 | 4.214264707 | 3.53211207 | 3.01082333  | 3.18923134  | 3.048313623  |
| ENSMUSG00000022360.6   | Atad2       | -0.68639 | 3.771541 | -2.95685 | 0.009944 | 0.105823 | -0.01737 | 4.290806865 | 4.165847577 | 3.81379654 | 4.076065446 | 3.39280806  | 2.889923652  |
| ENSMUSG00000051934.4   | Spas2       | -0.68563 | 2.817643 | -3.08373 | 0.007692 | 0.092428 | -2.56827 | 3.533286052 | 3.110624075 | 2.80937787 | 2.844592302 | 3.230338422 | 2.387623834  |
| ENSMUSG00000045095.16  | Mag1        | -0.6849  | 3.552392 | -2.64513 | 0.018575 | 0.152181 | -3.5592  | 3.907311834 | 4.084832889 | 3.60530795 | 3.925946997 | 3.244035054 | 2.546910839  |
| ENSMUSG00000013236.16  | Ptprs       | -0.68459 | 6.039459 | -3.10829 | 0.007318 | 0.090347 | -2.95019 | 6.364472565 | 6.758177048 | 6.02384598 | 5.888810958 | 6.17036847  | 5.06451837   |
| ENSMUSG00000046329.14  | Slc25a23    | -0.68302 | 1.987859 | -2.51303 | 0.024116 | 0.179077 | -3.44926 | 1.961204842 | 2.841455443 | 2.2021167  | 1.944659258 | 1.29386621  | 1.683851484  |
| ENSMUSG00000017716.15  | Birc5       | -0.68287 | 1.930818 | -2.85643 | 0.012175 | 0.110954 | -2.82771 | 2.361742772 | 2.274871471 | 2.14715024 | 1.914620242 | 1.396959703 | 1.498582663  |
| ENSMUSG00000026787.3   | Gad2        | -0.68253 | 1.062469 | -2.23134 | 0.041632 | 0.211615 | -3.7541  | 1.347095996 | 1.256492942 | 1.61039683 | 0.630148634 | 0.568726051 | 0.961953338  |
| ENSMUSG000000092035.8  | Peg10       | -0.6823  | 5.28175  | -2.79237 | 0.013846 | 0.128445 | -3.54218 | 5.990952186 | 5.594972213 | 5.25993133 | 5.679019701 | 4.713904391 | 4.45172312   |
| ENSMUSG000000044636.5  | Csrnp2      | -0.68209 | 2.245676 | -2.51875 | 0.023847 | 0.170191 | -3.49116 | 2.30224176  | 3.209495462 | 2.33101443 | 1.944659258 | 1.523871816 | 2.162772347  |
| ENSMUSG00000005233.16  | Spc25       | -0.68189 | 1.911495 | -2.45681 | 0.026926 | 0.178609 | -3.5317  | 2.446631669 | 2.160915282 | 2.06056255 | 2.11293074  | 1.583372827 | 1.104557734  |
| ENSMUSG000000002835.8  | Chaf1a      | -0.67958 | 3.200992 | -3.91574 | 0.001419 | 0.034612 | -1.03103 | 3.680753383 | 3.678449855 | 3.2744309  | 3.024226515 | 2.728803267 | 2.819288109  |
| ENSMUSG00000028782.14  | Adgrb2      | -0.67938 | 1.489864 | -2.4765  | 0.025909 | 0.176124 | -3.42151 | 1.754753965 | 2.07961518  | 1.65047427 | 1.275483757 | 1.29386621  | 0.884991356  |
| ENSMUSG00000032363.15  | Adams7      | -0.67855 | 2.091856 | -2.50707 | 0.022389 | 0.16509  | -3.40341 | 2.271544963 | 2.88995396  | 2.11886119 | 2.139162282 | 1.722200532 | 1.4094912315 |
| ENSMUSG00000029469.14  | Irf8        | -0.67812 | 1.877388 | -2.92226 | 0.010663 | 0.110463 | -2.70013 | 2.072236155 | 2.274871471 | 2.28082867 | 1.648527164 | 1.55392905  | 1.436633784  |
| ENSMUSG00000021175.15  | Cdca7       | -0.67741 | 1.960986 | -2.16098 | 0.047583 | 0.219824 | -0.03971 | 2.271544963 | 2.07961518  | 2.40316422 | 2.139162282 | 1.987439209 | 0.884991356  |
| ENSMUSG00000028613.14  | Lpr8        | -0.67615 | 2.82607  | -3.07371 | 0.00785  | 0.093553 | -2.58909 | 3.263767612 | 3.548519551 | 2.71803575 | 2.69347527  | 2.302744362 | 2.429876471  |
| ENSMUSG00000027115.14  | Kif18a      | -0.67527 | 1.750618 | -2.26733 | 0.038864 | 0.207284 | -3.82033 | 1.882133271 | 2.037179913 | 2.25506558 | 1.611532956 | 1.872879445 | 0.84913917   |
| ENSMUSG00000067928.6   | Zfp760      | -0.67501 | 2.035613 | -2.32931 | 0.034496 | 0.199349 | -3.77532 | 1.999172692 | 2.739275048 | 2.33101443 | 2.333431102 | 1.228027448 | 1.58998456   |
| ENSMUSG00000027204.13  | Fbn1        | -0.67486 | 3.577606 | -4.06963 | 0.00104  | 0.030085 | -0.79647 | 4.013156922 | 4.125908832 | 3.61546782 | 3.426895457 | 3.158587352 | 3.125619349  |
| ENSMUSG00000029661.6   | Col1a2      | -0.67476 | 6.101863 | -5.57093 | 5.70E-05 | 0.008819 | -1.88073 | 6.357181608 | 6.675858962 | 6.28481292 | 5.882935447 | 5.696325643 | 5.714062418  |
| ENSMUSG00000036036.11  | Lzts1       | -0.67356 | 2.557558 | -2.29832 | 0.036619 | 0.202683 | -3.94459 | 3.027006991 | 3.422301835 | 2.25065528 | 2.76259893  | 1.795062568 | 2.70887109   |
| ENSMUSG00000030528.12  | Blm         | -0.67223 | 2.802617 | -2.19221 | 0.044851 | 0.215717 | -1.8444  | 3.324843189 | 3.247215128 | 2.77353267 | 2.828562193 | 3.003864757 | 1.637681307  |
| ENSMUSG00000074221.11  | Zfp568      | -0.67148 | 3.229345 | -3.1049  | 0.007369 | 0.096165 | -2.61454 | 3.30981498  | 3.919457955 | 3.44364329 | 3.37265213  | 3.005010667 | 2.89593117   |
| ENSMUSG00000017485.10  | Top2b       | -0.67055 | 5.533692 | -5.79768 | 3.77E-05 | 0.008043 | 2.304141 | 5.750586331 | 5.969681153 | 5.88376562 | 5.379545376 | 5.079429678 | 5.13914634   |
| ENSMUSG000000062115.1  | Rai1        | -0.67053 | 4.005455 | -3.54602 | 0.030004 | 0.053603 | -1.90825 | 4.443192585 | 4.574717068 | 3.99525209 | 3.887787328 | 3.869895586 | 3.261212063  |
| ENSMUSG00000039328.9   | Rnf122      | -0.67027 | 2.24006  | -2.51016 | 0.024253 | 0.171081 | -3.50177 | 2.651249389 | 2.765506889 | 2.28082867 | 2.239564179 | 1.29386621  | 2.113019312  |
| ENSMUSG00000015880.13  | Ncapg       | -0.66954 | 2.648804 | -2.13648 | 0.049835 | 0.222753 | -2.43984 | 3.199991702 | 2.629302206 | 2.9604956  | 2.952076729 | 2.661375539 | 1.4868982663 |
| ENSMUSG00000040209.12  | Zfp704      | -0.66948 | 3.160745 | -3.684   | 0.002269 | 0.045041 | -1.47546 | 3.439745284 | 3.502472184 | 3.48855571 | 3.233489664 | 2.633496307 | 2.666710351  |
| ENSMUSG000000008823.16 | Zfp512b     | -0.66938 | 3.50464  | -3.55072 | 0.002975 | 0.053262 | -1.80305 | 3.738010701 | 4.074378531 | 3.67496883 | 3.625517186 | 2.902383439 | 3.012579411  |
| ENSMUSG00000033810.6   | Alms1       | -0.66917 | 3.487384 | -2.48516 | 0.025472 | 0.157276 | -3.83796 | 3.760292148 | 4.306481078 | 3.37353905 | 3.559065536 | 3.441856241 | 2.483069957  |
| ENSMUSG00000022704.15  | Qtrr2       | -0.66628 | 1.868705 | -2.72727 | 0.015772 | 0.193932 | -0.04927 | 2.208119583 | 2.414034219 | 2.03050532 | 1.322026339 | 1.77419517  | 1.063351122  |
| ENSMUSG00000060548.12  | Tnfrsf19    | -0.66593 | 1.988862 | -2.22542 | 0.042105 | 0.212176 | -3.93963 | 2.240180792 | 2.380481659 | 2.28883404 | 2.2103507   | 1.77419517  | 1.94994545   |
| ENSMUSG00000038535.17  | Zfp280d     | -0.66583 | 3.848133 | -4.29658 | 0.00066  | 0.023696 | -0.39733 | 4.111764519 | 4.146016406 | 4.23213918 | 3.848572153 | 3.448193213 | 3.266813985  |
| ENSMUSG00000028906.15  | Epb41       | -0.6639  | 5.360686 | -5.21735 | 0.00011  | 0.010497 | 1.230764 | 5.649758231 | 5.946938691 | 5.48440046 | 5.15371059  | 4.963844825 | 4.965462124  |
| ENSMUSG00000094936.7   | Rbm4        | -0.6632  | 1.251608 | -2.14925 | 0.048649 | 0.220972 | -3.91528 | 1.347095996 | 1.752450437 | 1.61039683 | 1.367114228 | 1.050608059 | 0.923985488  |
| ENSMUSG00000061482.6   | Hist1h4d    | -0.66285 | 3.804083 | -2.40187 | 0.029972 | 0.187415 | -0.06168 | 4.022404999 | 4.749167853 | 3.61546782 | 4.187096259 | 3.158587352 | 3.091771578  |
| ENSMUSG00000030770.14  | Parva       | -0.66237 | 2.005138 | -2.18738 | 0.045263 | 0.216614 | -0.06642 | 2.332298994 | 3.069122806 | 1.6894684  | 1.820479846 | 1.55392905  | 1.565353117  |
| ENSMUSG00000020121.15  | Srgap1      | -0.66154 | 2.552208 | -2.15822 | 0.047832 | 0.220095 | -1.80609 | 2.577876203 | 3.771990623 | 2.35546747 | 2.355973671 | 2.437831985 | 1.81410787   |
| ENSMUSG00000028456.17  | Unc13b      | -0.66131 | 2.816011 | -3.29114 | 0.050047 | 0.073296 | -2.17159 | 3.06330303  | 3.228478566 | 3.1117014  | 2.620870821 | 2.741918767 | 2.129790525  |
| ENSMUSG00000040880.11  | Lbr         | -0.66115 | 3.14706  | -2.72627 | 0.015804 | 0.139518 | -3.31395 | 2.577876203 | 3.745877783 | 2.94446549 | 3.293138647 | 2.702209057 | 2.469953875  |
| ENSMUSG00000037907.16  | Ankrd13b    | -0.66113 | 3.433807 | -3.87475 | 0.001541 | 0.036283 | -1.15285 | 3.927143006 | 3.919457955 | 3.4500315  | 3.281384354 | 3.02547857  | 2.994374816  |
| ENSMUSG00000075031.3   | Hist1h2b    | -0.66109 | 3.190353 | -2.67211 | 0.017605 | 0.148024 | -2.42467 | 3.657198655 | 3.954084298 | 2.9604956  | 3.339099852 | 2.576068027 | 2.655168729  |
| ENSMUSG00000022120.3   | Rnf219      | -0.66024 | 2.421798 | -3.08617 | 0.007654 | 0.092285 | -2.48805 | 2.871937504 | 2.913605228 | 2.49407271 | 2.29564179  | 1.848833971 | 1.612772347  |
| ENSMUSG00000034653.11  | Ythcd2      | -0.65992 | 2.161756 | -3.02261 | 0.006706 | 0.098507 | -2.56166 | 2.500570476 | 2.571033565 | 2.37951295 | 2.058991933 | 1.799506258 | 2.166951082  |
| ENSMUSG00000037098.17  | Rab11fip3   | -0.6595  | 3.222242 | -3.12422 | 0.007086 | 0.089029 | -2.57583 | 3.177305141 | 3.79763921  | 3.09727433 | 3.079465036 | 3.003864757 | 2.583910046  |
| ENSMUSG00000063804.7   | Linc28b     | -0.65937 | 2.779412 | -2.46649 | 0.026421 | 0.177364 | -3.70165 | 3.294628576 | 3.004513725 | 2.92825526 | 2.922175243 | 2.754916107 | 1.771982394  |
| ENSMUSG00000016624.15  | Phf21b      | -0.65826 | 3.446997 | -3.05336 | 0.008181 | 0.095707 | -2.76131 | 3.782234701 | 4.125908832 | 3.44364329 | 3.079465036 | 3.527663395 | 2.723077294  |
| ENSMUSG00000030930.13  | Chst15      | -0.65684 | 2.531529 | -2.90616 | 0.011015 | 0.112165 | -2.84522 | 2.787668587 | 3.319818877 | 2.53746531 | 2.239564179 | 1.987439209 | 2.817218617  |
| ENSMUSG00000021767.16  | Kat6b       | -0.65577 | 3.820512 | -2.84981 | 0.012338 | 0.120323 | -2.23266 | 4.372631088 | 4.13599765  | 3.87427764 | 3.819393603 | 3.751677733 | 2.87009248   |
| ENSMUSG00000040093.15  | Bmf         | -0.65544 | 1.838941 | -2.58781 | 0.02081  | 0.158953 | -3.29046 | 2.30224176  | 2.199909414 | 2.06056255 | 1.322026339 | 1.29386621  | 1.850538134  |
| ENSMUSG00000039195.8   | Snhg5       | -0.65476 | 2.551709 | -3.06692 | 0.007959 | 0.094099 | -2.54749 | 2.743613407 | 2.685366241 | 3.12598563 | 2.463687488 | 3.230338422 | 1.971291202  |
| ENSMUSG00000039716.12  | Dock3       | -0.65389 | 1.750751 | -2.13485 | 0.049987 | 0.222777 | -0.03693 | 2.107425583 | 2.120837843 | 1.96844433 | 1.410836506 | 2.05204829  | 0.849413917  |
| ENSMUSG00000017861.11  | Mybl2       | -0.65371 | 1.863075 | -2.69663 | 0.021571 | 0.161802 | -3.32642 | 2.072236155 | 2.07961518  | 2.33101443 | 1.974103035 | 1.396959703 | 1.625423417  |
| ENSMUSG00000076258.1   | Gm23935     | -0.65357 | 15.27642 | -2.26502 | 0.039036 | 0.207621 | -4.27189 | 15.887465   | 16.02189195 | 14.9036155 | 15.56300579 | 14.90618725 | 14.37633485  |
| ENSMUSG00000001517.14  | Foxm1       | -0.65346 | 3.045604 | -2.45028 | 0.027273 | 0.17995  | -3.79411 | 3.30981498  | 3.82283964  | 2.94446549 | 3.269558919 | 2.780564695 | 2.146377909  |
| ENSMUSG00000050334.12  | C130071C03R | -0.65286 | 2.       |          |          |          |          |             |             |            |             |             |              |

|                        |           |          |          |          |          |          |          |             |             |            |             |             |             |
|------------------------|-----------|----------|----------|----------|----------|----------|----------|-------------|-------------|------------|-------------|-------------|-------------|
| ENSMUSG00000020801.8   | Med31     | -0.62218 | 2.077282 | -2.37393 | 0.031644 | 0.191705 | -3.70757 | 2.107425583 | 2.237877264 | 2.71803755 | 2.031246943 | 1.987439209 | 1.381667324 |
| ENSMUSG00000020899.15  | Pfas      | -0.62212 | 3.647532 | -2.74278 | 0.015291 | 0.13661  | -3.39784 | 3.994480997 | 4.185409844 | 3.64552505 | 3.832586449 | 3.449871234 | 2.777315838 |
| ENSMUSG00000078532.9   | Nkain1    | -0.62164 | 2.802936 | -3.44547 | 0.003686 | 0.061014 | -1.87241 | 3.133265588 | 3.150999813 | 3.03807854 | 2.602134258 | 2.590640828 | 2.029497111 |
| ENSMUSG00000051627.2   | Hist1h1e  | -0.62148 | 4.459949 | -2.39335 | 0.030473 | 0.188438 | -4.20204 | 4.822498571 | 5.356953124 | 4.13660674 | 4.726289367 | 3.869895586 | 3.847451639 |
| 2410089E03R1           |           | -0.62138 | 4.102784 | -2.97953 | 0.009499 | 0.103548 | -3.03888 | 3.941642449 | 4.418173949 | 4.37054279 | 4.129381261 | 4.121434353 | 3.310068831 |
| ENSMUSG00000031822.18  | Gse1      | -0.62128 | 3.667117 | -2.79399 | 0.013801 | 0.128301 | -3.30599 | 4.400725182 | 4.46694575  | 3.3747458  | 3.316289969 | 3.664822641 | 3.039462705 |
| Stfgal1                |           | -0.62017 | 2.848847 | -3.42439 | 0.030848 | 0.061912 | -1.9214  | 3.263767612 | 3.170763068 | 3.03807854 | 2.71106868  | 2.3777205   | 2.51683744  |
| ENSMUSG000000598673.1  | Zfp242    | -0.62004 | 3.231602 | -3.04395 | 0.008338 | 0.096751 | -2.75187 | 3.611219401 | 3.976715272 | 3.36151652 | 3.052105547 | 2.619352152 | 2.398793142 |
| ENSMUSG00000009076.1   | Gm340     | -0.61886 | 2.758492 | -3.08276 | 0.007708 | 0.029428 | -2.55817 | 2.721070838 | 3.302007601 | 3.20884256 | 2.263609653 | 2.546473245 | 2.498409788 |
| ENSMUSG00000021244.1   | Ypml1     | -0.61823 | 4.725212 | -4.10784 | 0.000968 | 0.028986 | -0.89064 | 4.843521822 | 5.27586918  | 4.97437371 | 4.743490107 | 4.300529941 | 4.216767237 |
| ENSMUSG00000001506.10  | Coll1a    | -0.61783 | 5.6102   | -4.45739 | 0.000048 | 0.020447 | -0.25105 | 5.730976581 | 6.269153291 | 5.76328863 | 5.300396323 | 5.408533638 | 5.408533638 |
| ENSMUSG00000022816.11  | Fst1l     | -0.61764 | 4.242977 | -4.13101 | 0.00092  | 0.028565 | -0.78506 | 4.490609366 | 4.910669937 | 4.29037245 | 3.910800454 | 3.881794169 | 3.973616255 |
| ENSMUSG000000025764.14 | Jade1     | -0.61658 | 2.692144 | -2.91095 | 0.010909 | 0.111729 | -2.86832 | 2.912295242 | 2.88995396  | 3.12598563 | 2.828562193 | 2.09356756  | 2.302497111 |
| Hist1h4k               |           | -0.6165  | 3.932084 | -2.79211 | 0.013853 | 0.128445 | -3.3658  | 4.267661528 | 4.709182983 | 3.75066856 | 4.076065446 | 3.376080974 | 3.41284232  |
| ENSMUSG00000031558.15  | Silt2     | -0.61643 | 4.390312 | -2.19537 | 0.044582 | 0.214964 | -4.54124 | 4.630231608 | 4.939757516 | 4.46907833 | 4.704495976 | 4.407286841 | 3.191021824 |
| Erc1                   |           | -0.61618 | 3.320046 | -3.75311 | 0.001972 | 0.042003 | -1.37001 | 3.467095772 | 3.859833972 | 3.55340685 | 3.132648975 | 3.057304016 | 2.849984896 |
| ENSMUSG00000007137.11  | Tia1      | -0.61586 | 4.673924 | -4.1368  | 0.009099 | 0.028367 | -0.82774 | 5.047535714 | 4.904781378 | 4.96646126 | 4.609189016 | 4.514349402 | 4.001228487 |
| Kif22                  |           | -0.61564 | 2.403584 | -2.3648  | 0.032208 | 0.193215 | -3.79413 | 2.932058497 | 2.629302206 | 2.49407271 | 2.76259893  | 1.748432074 | 1.850538134 |
| ENSMUSG00000024151.13  | Msh2      | -0.61554 | 3.111988 | -2.68268 | 0.017239 | 0.14641  | -3.38653 | 4.085079001 | 3.63642664  | 3.12598563 | 3.32773999  | 3.302744362 | 2.798454606 |
| ENSMUSG00000029730.16  | Mcm7      | -0.61526 | 4.263342 | -3.33698 | 0.004597 | 0.069395 | -2.36614 | 4.708600741 | 4.715924561 | 4.26478073 | 4.434858835 | 3.770998831 | 3.686688643 |
| ENSMUSG00000029833.17  | Trim24    | -0.61459 | 3.820489 | -4.07153 | 0.001036 | 0.030035 | -0.83474 | 4.013156922 | 4.155966066 | 4.18516356 | 3.616209443 | 3.698850045 | 3.25358751  |
| ENSMUSG00000026020.9   | Nop58     | -0.61435 | 3.906574 | -3.6881  | 0.00225  | 0.044897 | -1.60837 | 4.244138805 | 4.242553751 | 4.10810814 | 4.027740999 | 3.481493213 | 3.335411733 |
| ENSMUSG00000016552.13  | Foxr2d    | -0.61394 | 1.466741 | -2.26825 | 0.038796 | 0.207679 | -3.76392 | 1.615029201 | 1.993458536 | 1.76443060 | 0.899335267 | 1.29386621  | 1.234325608 |
| ENSMUSG00000037606.17  | Ospb15    | -0.61355 | 5.151088 | -2.2548  | 0.039807 | 0.208663 | -3.79401 | 1.798475342 | 2.037179913 | 1.61039683 | 1.494493535 | 1.020155398 | 1.104557733 |
| ENSMUSG00000025880.11  | Smad7     | -0.61208 | 2.785773 | -2.61379 | 0.019767 | 0.155822 | -3.43784 | 3.216201929 | 3.388943238 | 3.66032206 | 2.922175243 | 2.284933085 | 2.242061257 |
| ENSMUSG00000034739.16  | Adgrb1    | -0.61114 | 1.435758 | -2.25975 | 0.039432 | 0.208097 | -3.77187 | 1.709666705 | 1.525679575 | 1.96844435 | 1.07266687  | 1.103732507 | 1.234325608 |
| ENSMUSG00000034329.16  | Brip1     | -0.60999 | 2.27192  | -2.6427  | 0.018665 | 0.152281 | -3.2755  | 2.743613407 | 2.765506899 | 2.22883404 | 2.11293074  | 2.05204829  | 1.728589799 |
| ENSMUSG00000027379.13  | But1      | -0.60842 | 2.807062 | -2.46157 | 0.026677 | 0.177985 | -3.71653 | 3.199991702 | 3.213605228 | 3.1117014  | 2.922175243 | 2.780564695 | 1.914335318 |
| ENSMUSG00000063160.12  | Numb1     | -0.60739 | 2.629915 | -3.01867 | 0.008776 | 0.098962 | -2.65387 | 3.081114306 | 3.150999813 | 3.62052105 | 2.263609653 | 2.302744362 | 2.365002714 |
| ENSMUSG000000033766.14 | Theml131l | -0.60735 | 4.297535 | -3.77042 | 0.001904 | 0.041006 | -1.50972 | 4.624169855 | 4.632868821 | 4.52044479 | 4.135903034 | 4.2691657   | 3.59904834  |
| ENSMUSG00000071855.4   | Cdc112    | -0.60585 | 2.006341 | -2.47398 | 0.026037 | 0.176459 | -3.52086 | 2.271544963 | 2.540946331 | 2.2021167  | 1.275483753 | 1.872879445 | 1.875058887 |
| ENSMUSG000000028654.13 | Myc1      | -0.6058  | 2.75553  | -2.78035 | 0.014184 | 0.130453 | -3.12516 | 3.018114306 | 3.19818877  | 2.77353267 | 2.828562193 | 2.11388754  | 2.416265966 |
| ENSMUSG000000031826.19 | Usp10     | -0.60559 | 3.80318  | -4.41661 | 0.00052  | 0.020975 | -0.15559 | 4.085532977 | 4.13599765  | 4.07903521 | 3.689042323 | 3.376080974 | 3.453390012 |
| ENSMUSG000000022893.14 | Adamts1   | -0.60289 | 2.694029 | -2.96465 | 0.010155 | 0.107283 | -2.80228 | 3.06330303  | 3.170763068 | 2.73677474 | 2.675663924 | 2.354895644 | 2.162772347 |
| ENSMUSG000000069310.3  | Hist1h3c  | -0.60103 | 3.432416 | -2.37418 | 0.031628 | 0.191705 | -4.02403 | 3.81435193  | 4.233185568 | 3.15413667 | 3.662159209 | 2.890654146 | 2.839825054 |
| ENSMUSG000000037784.14 | Dzip11    | -0.60085 | 2.30636  | -2.46925 | 0.026279 | 0.176849 | -3.59073 | 2.851327224 | 2.685336241 | 2.25065588 | 2.333431102 | 2.05204829  | 1.660951082 |
| ENSMUSG000000024665.7  | Fads2     | -0.59967 | 2.82659  | -2.46677 | 0.026407 | 0.177356 | -3.71219 | 3.383437843 | 3.337412937 | 2.6405558  | 2.906988884 | 2.561346521 | 2.129795025 |
| ENSMUSG000000070047.11 | Fat1      | -0.5996  | 5.530384 | -2.55198 | 0.022336 | 0.164957 | -4.00862 | 5.896035828 | 6.159679569 | 5.4336295  | 5.523411266 | 5.673232523 | 4.542224143 |
| ENSMUSG000000064061.13 | Dzip3     | -0.59827 | 3.770252 | -3.61301 | 0.002621 | 0.048717 | -1.73173 | 4.28241179  | 4.053239764 | 3.89944156 | 3.653085446 | 3.637010791 | 3.15049017  |
| ENSMUSG000000029629.16 | Phf14     | -0.59804 | 4.387881 | -4.5285  | 0.004417 | 0.018974 | -0.02142 | 4.671965366 | 4.807141078 | 4.57178538 | 4.272524377 | 4.116407536 | 3.887459612 |
| ENSMUSG00000026724.11  | Pask      | -0.59792 | 2.1293   | -2.17603 | 0.046248 | 0.217853 | -0.05209 | 2.463631669 | 2.380481659 | 2.37951298 | 2.086213402 | 2.248636956 | 1.234325608 |
| ENSMUSG000000030091.17 | Nup210    | -0.5979  | 2.667316 | -2.48336 | 0.027915 | 0.181137 | -3.72575 | 3.167014379 | 3.405718951 | 3.27951295 | 2.524655505 | 2.284933085 | 2.242061257 |
| ENSMUSG000000027699.15 | Zfp362    | -0.59789 | 3.118954 | -3.00805 | 0.008967 | 0.099771 | -2.7758  | 3.45348534  | 3.664577681 | 3.12598563 | 3.038233373 | 2.948369635 | 2.480361657 |
| ENSMUSG000000034543.14 | Morc2a    | -0.59756 | 4.247125 | -4.61997 | 0.00348  | 0.018054 | 0.175002 | 4.510463281 | 4.639975707 | 4.48578927 | 4.096290474 | 3.758147229 | 3.992083004 |
| ENSMUSG000000036916.13 | Zfp280c   | -0.59711 | 2.588694 | -2.59406 | 0.020554 | 0.158152 | -3.4295  | 2.970790891 | 2.913605228 | 2.73677412 | 2.442778498 | 2.633496370 | 1.83471815  |
| ENSMUSG000000020070.18 | Rufy2     | -0.59623 | 2.659614 | -2.48226 | 0.028471 | 0.182623 | -3.74119 | 2.765809153 | 2.913605228 | 3.08270153 | 2.844592302 | 2.516258632 | 1.83471815  |
| ENSMUSG00000026458.13  | Ppf14a    | -0.59572 | 1.598998 | -2.31235 | 0.035643 | 0.20128  | -3.71581 | 1.663123489 | 1.901828061 | 2.09000633 | 1.21938621  | 1.29386612  | 1.234325608 |
| ENSMUSG00000002870.8   | Mcm2      | -0.59566 | 3.950019 | -2.92082 | 0.010694 | 0.110646 | -3.12309 | 4.328575908 | 4.618549149 | 3.79604007 | 4.034744387 | 3.57240171  | 3.349802826 |
| ENSMUSG000000038943.16 | Prc1      | -0.59489 | 2.510563 | -2.29953 | 0.036534 | 0.202683 | -3.93099 | 2.743613407 | 3.004513725 | 2.60021016 | 2.891640875 | 2.009298643 | 1.81410787  |
| ENSMUSG00000069769.13  | Msi2      | -0.59388 | 4.772722 | -3.69221 | 0.002231 | 0.044692 | -1.72563 | 5.28505249  | 5.192677844 | 4.73444531 | 4.566335327 | 4.676823739 | 4.180996106 |
| ENSMUSG00000002478.9   | Star4d    | -0.59361 | 3.25167  | -2.77215 | 0.014218 | 0.132159 | -3.05165 | 2.698170436 | 2.865908486 | 2.5546747  | 2.194602034 | 2.07295728  | 2.043894951 |
| ENSMUSG000000039895.14 | Fam60a    | -0.5935  | 2.595575 | -2.51569 | 0.02399  | 0.170562 | -3.57181 | 2.851327224 | 3.283973678 | 2.53746531 | 2.71106868  | 2.09356756  | 2.096046233 |
| ENSMUSG000000028633.7  | Ctps      | -0.59251 | 2.831365 | -2.62376 | 0.01938  | 0.154432 | -3.42995 | 2.76368587  | 3.607715344 | 2.97634955 | 2.876171787 | 2.437831985 | 2.302497111 |
| ENSMUSG000000037111.9  | Set7      | -0.59216 | 3.18766  | -3.42319 | 0.003857 | 0.06192  | -1.98897 | 3.533286052 | 3.533333147 | 3.40901694 | 2.922175243 | 2.619352125 | 3.108794726 |
| ENSMUSG000000044330.8  | Gm9790    | -0.59185 | 2.578009 | -2.61875 | 0.019574 | 0.155099 | -3.38196 | 2.912295242 | 2.936875008 | 2.844354   | 1.719785847 | 2.546473245 | 2.480693957 |
| ENSMUSG000000046179.18 | E2f8      | -0.59175 | 2.45986  | -2.41224 | 0.029373 | 0.185875 | -3.72425 | 3.32298994  | 2.685336241 | 2.32543677 | 2.058991933 | 2.030831824 | 2.026165986 |
| ENSMUSG000000033436.13 | Armcx2    | -0.59167 | 3.664579 | -3.26361 | 0.005338 | 0.075795 | -2.3986  | 3.985051584 | 4.2047104   | 3.67496883 | 3.724124693 | 3.298312115 | 3.10038026  |
| ENSMUSG000000027306.15 | Nusap1    | -0.59124 | 1.896555 | -2.35746 | 0.03267  | 0.194496 | -3.69843 | 1.507425583 | 2.274871147 | 2.14715024 | 2.031246943 | 1.329055639 | 1.489582663 |
| ENSMUSG000000039089.14 | L3mbt13   | -0.59096 | 3.037791 | -3.2428  | 0.005568 | 0.077675 | -2.30802 | 3.183597264 | 3.438696273 | 3.33716666 | 2.966798235 | 2.830533154 | 2.469953829 |
| ENSMUSG000000039262.16 | Prrc2b    | -0.59079 | 6.007308 | -4.16659 | 0.008856 | 0.027359 | -0.83544 | 6.262792489 | 6.595886179 | 6.05030086 | 5.930647865 | 5.651852565 | 5.552370657 |
| ENSMUSG000000038195.15 | Rilp      | -0.59034 | 1.456919 | -2.2546  | 0.039823 | 0.208663 | -3.78404 | 1.663123489 | 1.699011178 | 1.87       |             |             |             |

|                        |          |          |          |          |          |          |          |             |             |             |             |             |             |
|------------------------|----------|----------|----------|----------|----------|----------|----------|-------------|-------------|-------------|-------------|-------------|-------------|
| ENSMUSG00000048732.5   | Klh11    | -0.55537 | 1.94275  | -2.23205 | 0.041575 | 0.211556 | -3.91879 | 2.30224176  | 2.540946331 | 1.90359321  | 1.410835606 | 1.748432074 | 1.750449233 |
| ENSMUSG00000036564.16  | Ndrq4    | -0.55472 | 2.032773 | -2.5324  | 0.023214 | 0.167585 | -3.42456 | 2.30224176  | 2.414034219 | 2.22883404  | 1.820479846 | 1.774195171 | 1.683851484 |
| ENSMUSG00000035133.8   | Ahrqap5  | -0.55444 | 4.107484 | -3.19427 | 0.006146 | 0.081899 | -2.62042 | 4.536517173 | 4.458930757 | 4.1295347   | 4.230442989 | 3.764587842 | 3.524885954 |
| ENSMUSG00000079036.10  | Alkhh1   | -0.55358 | 3.160208 | -3.12635 | 0.070055 | 0.088278 | -2.55763 | 3.493937384 | 3.405718951 | 3.37353905  | 3.221263362 | 2.647503165 | 2.921881010 |
| ENSMUSG00000027778.15  | Ifh80    | -0.55295 | 2.541433 | -2.31558 | 0.035422 | 0.20128  | -3.91033 | 4.907909891 | 2.88995396  | 2.53746531  | 2.728450708 | 2.626899163 | 1.850381314 |
| ENSMUSG00000025747.12  | Tyms     | -0.55162 | 2.679344 | -2.81267 | 0.013294 | 0.126069 | -3.04858 | 2.787668587 | 3.110642075 | 2.94446549  | 2.675663294 | 2.21140005  | 2.346218484 |
| ENSMUSG00000018547.15  | Trim37   | -0.55016 | 3.259848 | -2.87366 | 0.01176  | 0.116967 | -3.06207 | 3.533286052 | 3.486790561 | 3.52134564  | 3.468867727 | 2.688725828 | 2.860073728 |
| ENSMUSG00000074653.4   | Kifs5    | -0.55007 | 2.49188  | -2.18114 | 0.045802 | 0.217455 | -4.12749 | 2.787668587 | 3.110642075 | 2.426434    | 2.164925378 | 2.647503165 | 1.81410778  |
| ENSMUSG00000028483.13  | Snacp3   | -0.54968 | 3.162539 | -2.90318 | 0.11082  | 0.112483 | -2.98413 | 3.170763068 | 3.48855571  | 3.245613323 | 2.669505424 | 2.631804736 | 2.618010736 |
| ENSMUSG00000035024.13  | Ncapd3   | -0.54952 | 3.243646 | -2.22832 | 0.041873 | 0.212176 | -4.23193 | 3.520288711 | 3.692189912 | 3.26154961  | 3.643954344 | 2.914018139 | 2.429876417 |
| ENSMUSG00000034205.16  | Lovx2    | -0.54932 | 1.881521 | -2.34331 | 0.033576 | 0.196277 | -3.71937 | 2.107425583 | 2.380481659 | 1.99980852  | 1.648527164 | 1.61222769  | 1.540656848 |
| ENSMUSG0000003534.17   | Ddr1     | -0.54888 | 4.278356 | -2.89969 | 0.01116  | 0.113105 | -2.23272 | 4.517020997 | 4.874972569 | 4.25831124  | 4.290190252 | 4.161030528 | 3.56861091  |
| ENSMUSG00000028184.12  | Adgrl2   | -0.5485  | 5.121334 | -3.92322 | 0.001397 | 0.034469 | -1.29216 | 5.515384361 | 5.29527127  | 5.36000663  | 5.191803761 | 4.720545116 | 4.644993508 |
| ENSMUSG00000037544.13  | Dlgap5   | -0.54768 | 2.374855 | -2.51547 | 0.024001 | 0.170562 | -3.52345 | 2.390597634 | 2.816580774 | 2.69905445  | 2.400028851 | 2.009298643 | 1.933571536 |
| ENSMUSG00000032640.10  | Chsy1    | -0.54728 | 2.774087 | -2.19641 | 0.044494 | 0.214943 | -4.1698  | 3.045269107 | 3.405718951 | 2.67981823  | 3.052105547 | 2.207925728 | 2.388653755 |
| ENSMUSG00000029916.11  | Akg      | -0.54691 | 2.470151 | -2.37782 | 0.031406 | 0.190953 | -3.78613 | 2.473853138 | 2.816580774 | 2.87850223  | 2.400028851 | 2.437831985 | 1.81410778  |
| ENSMUSG00000025231.14  | Iitg8    | -0.54614 | 3.560444 | -2.52119 | 0.023732 | 0.169665 | -3.78845 | 3.877044395 | 3.678449855 | 3.88271448  | 3.824526679 | 2.728803267 | 3.37112383  |
| ENSMUSG00000063894.14  | Zkscan8  | -0.54591 | 2.470533 | -2.43647 | 0.028018 | 0.181318 | -3.68366 | 2.627203915 | 2.765506589 | 2.77353267  | 2.675663294 | 1.919800921 | 2.061489091 |
| ENSMUSG00000056394.17  | Lig1     | -0.54571 | 3.959787 | -3.58027 | 0.002802 | 0.051221 | -1.83128 | 4.146014081 | 4.359108008 | 4.16455328  | 3.970455258 | 3.692108467 | 4.426485828 |
| ENSMUSG00000032740.16  | Ccdc88a  | -0.54548 | 4.638491 | -4.11021 | 0.009599 | 0.028977 | -0.87641 | 4.874493209 | 4.89293166  | 4.94244914  | 4.627834768 | 4.365527195 | 4.127708698 |
| ENSMUSG00000018401.17  | Mtmr4    | -0.54505 | 4.283986 | -3.47004 | 0.003506 | 0.058449 | -2.10531 | 4.477219989 | 4.904781378 | 4.30927265  | 4.020703448 | 4.1804284   | 3.811510758 |
| ENSMUSG00000048402.14  | Gli2     | -0.54502 | 2.756586 | -2.30806 | 0.035939 | 0.202085 | -3.97425 | 3.116090444 | 3.283973678 | 2.66032206  | 2.844592302 | 2.590640828 | 2.043894951 |
| ENSMUSG00000029635.15  | Cdk8     | -0.54443 | 4.17492  | -3.95447 | 0.001312 | 0.033365 | -1.12439 | 4.436289725 | 4.359108008 | 4.52404479  | 4.096290474 | 3.664822641 | 3.968962396 |
| ENSMUSG00000045672.15  | Col27a1  | -0.54392 | 2.847656 | -2.80887 | 0.013395 | 0.126604 | -3.0919  | 3.167014379 | 3.54795016  | 2.844354    | 2.795957527 | 2.458362094 | 2.469953857 |
| ENSMUSG00000021597.16  | Sif1     | -0.54295 | 3.012402 | -2.95383 | 0.010005 | 0.106218 | -2.85532 | 3.279280612 | 3.422301835 | 3.14012981  | 3.024226515 | 2.485397668 | 2.723077734 |
| ENSMUSG00000041879.13  | Ipo9     | -0.54238 | 5.11808  | -4.2879  | 0.006072 | 0.023982 | -0.56456 | 5.381642329 | 5.508309124 | 2.72282702  | 5.094615843 | 4.762980382 | 4.688105193 |
| ENSMUSG0000006098.11   | Prrm7    | -0.54221 | 2.466344 | -2.64307 | 0.018652 | 0.152281 | -3.31465 | 2.871937504 | 2.88995396  | 2.49407271  | 2.058991933 | 3.230338422 | 2.162772347 |
| ENSMUSG00000036875.15  | Dna2     | -0.54146 | 2.518435 | -2.14784 | 0.048778 | 0.221249 | -4.18909 | 2.871937504 | 3.090031796 | 2.37951295  | 1.937559983 | 2.07925728  | 1.763515136 |
| ENSMUSG00000001761.7   | Smo      | -0.54038 | 3.667308 | -3.1338  | 0.006949 | 0.087573 | -2.65186 | 3.975560135 | 3.19457955  | 3.86579117  | 3.840601442 | 3.187635884 | 3.21480305  |
| ENSMUSG00000078584.9   | AU022752 | -0.53841 | 3.212457 | -3.12154 | 0.007124 | 0.089222 | -2.57849 | 3.80579001  | 3.719283573 | 3.3139875   | 3.71106863  | 2.959640757 | 3.091717578 |
| ENSMUSG00000028354.13  | Fmn2     | -0.53589 | 2.798207 | -2.61873 | 0.019574 | 0.150099 | -3.43115 | 2.915546672 | 3.228478566 | 2.99203117  | 2.657629637 | 2.780564695 | 1.718925754 |
| ENSMUSG00000035455.12  | Fign1    | -0.53571 | 2.285802 | -2.40893 | 0.029563 | 0.186335 | -3.69142 | 2.627203915 | 2.629302206 | 2.40316422  | 2.263609651 | 1.695483124 | 2.096046233 |
| ENSMUSG00000030231.10  | Plekha5  | -0.53564 | 3.877817 | -3.28543 | 0.005106 | 0.073913 | -2.99818 | 4.306033339 | 4.2047104   | 3.90773294  | 3.848572153 | 3.67169263  | 3.328161994 |
| ENSMUSG00000022914.15  | Brwd1    | -0.53555 | 4.912837 | -3.25971 | 0.00538  | 0.075998 | -2.60094 | 5.122555108 | 5.123375565 | 5.27282702  | 4.87417697  | 4.895063814 | 4.189022246 |
| ENSMUSG00000048490.13  | Nrip1    | -0.53472 | 3.594651 | -3.72113 | 0.002104 | 0.043105 | -1.48439 | 4.040725182 | 3.732641955 | 3.80494562  | 3.361554703 | 3.307163033 | 3.208985256 |
| ENSMUSG00000004891.16  | Nes      | -0.53439 | 4.987798 | -3.71237 | 0.002142 | 0.043616 | -1.70453 | 5.34156489  | 5.44073254  | 4.98617052  | 4.946517204 | 4.487345994 | 4.724454026 |
| ENSMUSG00000008985.11  | #N/A     | -0.53351 | 4.831732 | -2.33843 | 0.033895 | 0.197631 | -4.34837 | 5.113929103 | 4.933986728 | 5.19705164  | 5.13428006  | 4.743549852 | 3.867594304 |
| ENSMUSG00000021488.7   | Nsd1     | -0.53309 | 6.133392 | -3.74285 | 0.002013 | 0.042282 | -1.68454 | 4.939106099 | 6.507337939 | 6.19958639  | 6.194151516 | 6.365084814 | 5.755318107 |
| ENSMUSG00000061046.9   | Hagl1    | -0.53275 | 2.873335 | -2.95964 | 0.009889 | 0.105743 | -2.8146  | 3.183597264 | 3.20949562  | 3.60798002  | 2.355973671 | 2.767797399 | 2.677797399 |
| ENSMUSG00000020167.14  | Tcf3     | -0.53267 | 4.67493  | -4.43608 | 0.005051 | 0.020653 | -0.23498 | 4.973177484 | 5.012749875 | 4.83351477  | 4.580760607 | 4.304955389 | 4.344422975 |
| ENSMUSG00000003282.9   | Plag1    | -0.53124 | 1.938289 | -2.173   | 0.046514 | 0.217853 | -4.01437 | 2.240180792 | 1.993458536 | 2.30613976  | 1.883905227 | 1.813680324 | 1.813680324 |
| ENSMUSG00000021540.16  | Smad5    | -0.53033 | 4.270205 | -3.59012 | 0.002746 | 0.050549 | -1.8642  | 4.283132937 | 4.838369463 | 4.49131685  | 4.15531805  | 3.851861663 | 4.001228487 |
| ENSMUSG00000048285.8   | Frmf6    | -0.53017 | 3.044431 | -3.14414 | 0.006805 | 0.086635 | -2.49899 | 3.116090444 | 3.388943238 | 3.42065164  | 2.812351965 | 2.688725828 | 2.38982504  |
| ENSMUSG00000024913.16  | Lrp5     | -0.52997 | 3.486073 | -3.03057 | 0.008567 | 0.078251 | -2.81301 | 3.008573383 | 4.074378531 | 3.51049826  | 3.458488581 | 3.02547857  | 3.166842012 |
| ENSMUSG00000034235.16  | Usp54    | -0.5293  | 3.016847 | -2.64228 | 0.186861 | 0.52981  | -3.43814 | 3.685105557 | 3.371970159 | 3.42065164  | 2.844592302 | 3.02547857  | 3.429874717 |
| ENSMUSG00000026455.14  | Kih12    | -0.52881 | 2.727922 | -2.87844 | 0.011648 | 0.116121 | -2.93621 | 2.830418235 | 3.900031796 | 3.03807854  | 2.620878021 | 3.271868722 | 2.416265986 |
| ENSMUSG00000025233.13  | Atp13a3  | -0.52817 | 4.516813 | -4.20334 | 0.007996 | 0.026202 | -0.67744 | 4.784954202 | 4.742580193 | 4.08272438  | 4.429554082 | 4.044128627 | 4.296937586 |
| ENSMUSG00000036792.12  | Mbd5     | -0.52743 | 3.455655 | -3.25644 | 0.005416 | 0.076344 | -2.36823 | 3.669024091 | 3.63642664  | 3.79604007  | 3.468867727 | 3.187635884 | 2.975937567 |
| ENSMUSG00000031134.16  | RbmX     | -0.52737 | 4.162446 | -3.56882 | 0.002868 | 0.052286 | -1.88913 | 4.483930211 | 4.521837508 | 4.25831124  | 4.102969663 | 3.984633484 | 3.622944759 |
| ENSMUSG00000005225.15  | Plekha8  | -0.52697 | 2.766078 | -2.35961 | 0.032534 | 0.194203 | -3.88692 | 3.709790891 | 3.502472184 | 2.6405588   | 2.745625852 | 2.405227319 | 2.33191418  |
| ENSMUSG00000032198.8   | Dock6    | -0.52572 | 3.235411 | -3.10485 | 0.00737  | 0.090645 | -2.615   | 3.703929706 | 3.388943238 | 3.37353905  | 3.132648975 | 3.02547857  | 2.787293938 |
| ENSMUSG00000089824.10  | Rbm12    | -0.52545 | 3.257994 | -2.79601 | 0.013745 | 0.128071 | -3.20792 | 3.57158994  | 3.354795016 | 3.57439188  | 3.405442347 | 2.675115396 | 2.966629825 |
| ENSMUSG00000049823.9   | Ztb12    | -0.52533 | 2.393828 | -2.51746 | 0.023907 | 0.170415 | -3.52412 | 2.602750871 | 2.936875008 | 2.4493344   | 2.239564129 | 2.072957107 | 2.061489011 |
| ENSMUSG00000038718.15  | Pbx3     | -0.52512 | 3.209119 | -2.50682 | 0.024412 | 0.171439 | -3.73064 | 3.279280612 | 3.622142414 | 3.44364329  | 3.499564524 | 2.754916728 | 2.655168729 |
| ENSMUSG000000353774.8  | Ubxn7    | -0.52448 | 4.774431 | -4.03617 | 0.001113 | 0.030999 | -1.03797 | 5.047535714 | 5.207104915 | 4.8593934   | 4.682368317 | 4.326881267 | 4.523303281 |
| ENSMUSG000000066473.17 | Tbcd124  | -0.5236  | 3.183179 | -3.22021 | 0.00583  | 0.07959  | -2.38149 | 3.507173211 | 3.56354776  | 3.2744309   | 2.952076729 | 2.992935197 | 2.808990896 |
| ENSMUSG00000000561.14  | Wdr77    | -0.52264 | 2.593345 | -2.52934 | 0.023355 | 0.168195 | -3.56545 | 2.892257488 | 2.791269885 | 2.87802523  | 2.463687488 | 1.987439209 | 2.546915839 |
| ENSMUSG00000063785.12  | Utp14a   | -0.52173 | 2.660585 | -2.45331 | 0.027112 | 0.179309 | -3.69704 | 2.907909891 | 2.571003565 | 3.20884256  | 2.139162282 | 2.596306937 | 2.483069357 |
| ENSMUSG00000029290.12  | Zfp326   | -0.52118 | 3.452099 | -2.83609 | 0.012683 | 0.122354 | -3.17667 | 3.543854334 | 3.319457955 | 3.72274456  | 3.587920399 | 3.02547857  | 3.003505827 |
| ENSMUSG00000063052.9   | Lrrc40   | -0.5204  | 3.085808 | -3.24856 | 0.005504 | 0.077092 | -2.30657 | 3.397722069 | 3.388943238 | 3.3744309   | 2.745625852 | 2.818202352 | 2.889923652 |
| ENSMUSG00000029033.16  | Acap3    | -0.52021 | 2.697556 | -2.81181 | 0.013317 | 0.126119 | -3.05387 | 3.008510557 | 3.026373159 | 2.82697193  |             |             |             |

|                         |             |          |          |          |          |          |          |             |             |             |             |             |             |
|-------------------------|-------------|----------|----------|----------|----------|----------|----------|-------------|-------------|-------------|-------------|-------------|-------------|
| ENSMUSG00000041215.15   | Yeats2      | -0.4803  | 3.932657 | -2.20674 | 0.043629 | 0.213843 | -4.43242 | 4.058815639 | 4.35046909  | 4.05683947  | 4.109618006 | 3.928430797 | 3.091771578 |
| ENSMUSG00000026918.16   | Brd3        | -0.48009 | 4.844779 | -3.44123 | 0.003718 | 0.060404 | -2.23339 | 4.963607332 | 5.368832491 | 4.90979836  | 4.793895064 | 4.491234608 | 4.523303281 |
| ENSMUSG00000039630.19   | Hnrnpu      | -0.47794 | 5.027585 | -4.00819 | 0.001177 | 0.031531 | -1.11522 | 5.257906961 | 5.197502916 | 5.33255495  | 4.994002593 | 4.631735454 | 5.17804512  |
| ENSMUSG00000042460.5    | C1gal1      | -0.47711 | 2.671364 | -2.50677 | 0.024415 | 0.171439 | -6.30394 | 2.787668587 | 2.865908486 | 4.03310675  | 2.563914936 | 2.48636956  | 2.508947988 |
| ENSMUSG00000031078.13   | Cttn        | -0.47649 | 4.230972 | -3.88091 | 0.001522 | 0.036216 | -1.27872 | 4.574736495 | 4.5063661   | 4.33409382  | 4.020703448 | 3.962448849 | 3.887488423 |
| ENSMUSG00000015749.12   | Anp3z2e     | -0.47567 | 4.983443 | -3.81224 | 0.001749 | 0.038925 | -1.50376 | 5.269604552 | 5.254179076 | 5.13130596  | 4.994002593 | 4.66310002  | 4.584868328 |
| ENSMUSG00000036554.14   | lqce        | -0.47507 | 3.275669 | -2.21525 | 0.042929 | 0.212526 | -4.26196 | 3.45348534  | 3.719283573 | 3.33716666  | 3.559065536 | 2.906400828 | 2.994374816 |
| ENSMUSG00000041415.9    | Dicer1      | -0.47377 | 5.245779 | -4.39541 | 0.000543 | 0.02148  | -0.35865 | 5.488942474 | 5.557930511 | 4.40169732  | 5.101302378 | 4.926995993 | 4.997805721 |
| ENSMUSG00000031503.13   | Col4a2      | -0.47241 | 4.441813 | -3.06467 | 0.007995 | 0.094444 | -0.92859 | 4.618082525 | 5.029082446 | 4.40609355  | 4.369885978 | 4.027944885 | 4.209494180 |
| ENSMUSG00000028884.14   | Rpa2        | -0.47069 | 3.241842 | -3.09344 | 0.007542 | 0.091676 | -2.63809 | 4.439745284 | 3.517985183 | 3.48855571  | 2.922175243 | 3.02547857  | 3.057110571 |
| ENSMUSG00000022521.10   | Crebbp      | -0.47029 | 5.426727 | -3.97092 | 0.001269 | 0.032923 | -1.21293 | 5.649758231 | 5.811868647 | 5.2539248   | 5.291652170 | 5.261217016 | 5.024702252 |
| ENSMUSG00000040010.10   | Sic7a5      | -0.47012 | 2.994196 | -2.46243 | 0.026632 | 0.1778   | -3.75883 | 3.383437843 | 3.371970159 | 2.92825526  | 2.966798235 | 2.767797399 | 2.546915839 |
| ENSMUSG00000037369.16   | Kdm6a       | -0.46933 | 4.30908  | -2.61853 | 0.019582 | 0.155099 | -3.7621  | 4.422384123 | 4.681897157 | 4.51321776  | 4.142407941 | 4.459827761 | 3.634746011 |
| ENSMUSG00000074102.4    | Rbm15b      | -0.46896 | 4.373803 | -2.72058 | 0.015984 | 0.140192 | -3.58109 | 4.689488193 | 4.880983807 | 4.26478073  | 4.440143438 | 3.839712581 | 4.127708698 |
| ENSMUSG00000052539.15   | Magi3       | -0.46889 | 2.389592 | -2.13843 | 0.049652 | 0.222533 | -4.17313 | 2.743613407 | 2.510249534 | 2.58688179  | 2.54441876  | 2.009298643 | 1.971291202 |
| ENSMUSG00000037395.15   | Rcor3       | -0.46819 | 2.765977 | -2.49443 | 0.025013 | 0.173643 | -3.64755 | 3.216201929 | 2.841455443 | 2.91186082  | 2.71106863  | 2.485397668 | 2.429876417 |
| ENSMUSG00000080746.3    | Rpsa-ps12   | -0.46813 | 2.987795 | -2.51552 | 0.023998 | 0.170562 | -3.66186 | 3.279280612 | 2.95977541  | 3.42065164  | 2.657629371 | 2.633496307 | 2.975937567 |
| ENSMUSG00000089788.1    | #N/A        | -0.468   | 2.129565 | -2.18633 | 0.043553 | 0.216675 | -4.05506 | 2.500570476 | 2.600447343 | 2.30613976  | 1.883905927 | 1.883905927 | 1.129795025 |
| ENSMUSG00000038335.13   | Tsr1        | -0.46761 | 2.611013 | -2.2797  | 0.037953 | 0.205148 | -3.98767 | 2.698170436 | 3.069122806 | 2.75527046  | 2.463874888 | 2.561346521 | 2.113019312 |
| ENSMUSG00000009621.18   | Vav2        | -0.46761 | 3.522841 | -2.99265 | 0.00925  | 0.101526 | -2.89337 | 3.669204091 | 3.96544416  | 3.64552505  | 3.437503556 | 3.09867445  | 3.32087564  |
| ENSMUSG00000026496.11   | Parp1       | -0.46655 | 5.249191 | -3.60091 | 0.002686 | 0.049724 | -1.94549 | 5.557344892 | 5.623935696 | 5.26639358  | 5.231967031 | 4.909666615 | 4.905838141 |
| ENSMUSG00000021690.9    | Jmy         | -0.46641 | 2.984878 | -2.15907 | 0.047755 | 0.220204 | -2.84265 | 3.439745284 | 3.110624075 | 3.07927433  | 2.602134258 | 3.216111003 | 2.443359647 |
| ENSMUSG00000022702.15   | Hira        | -0.46581 | 3.238715 | -2.21906 | 0.042618 | 0.212361 | -0.03668 | 2.721070838 | 2.712557709 | 2.426434    | 2.031246943 | 2.354895644 | 2.026086375 |
| ENSMUSG00000024533.15   | Spir1e      | -0.46568 | 3.836642 | -3.01347 | 0.008699 | 0.099093 | -2.91986 | 4.20226186  | 4.063847864 | 3.89944156  | 3.872223721 | 3.565041005 | 3.399070371 |
| ENSMUSG00000028278.14   | Rrad        | -0.46531 | 3.284271 | -2.74733 | 0.015153 | 0.136008 | -3.30527 | 3.507173211 | 3.705800343 | 3.36151652  | 3.158527607 | 2.805765249 | 3.166842017 |
| ENSMUSG00000037426.3    | Dpdc5       | -0.46346 | 3.634579 | -3.2094  | 0.00596  | 0.080458 | -2.4974  | 3.793802083 | 4.084832889 | 3.74142048  | 3.426895657 | 3.376080974 | 3.385416769 |
| ENSMUSG00000072235.1    | Tuba1a      | -0.46333 | 3.62753  | -2.72422 | 0.015868 | 0.139769 | -3.69393 | 6.43888217  | 7.020258956 | 6.32406167  | 6.367807665 | 5.84199834  | 6.183509075 |
| ENSMUSG00000073664.11   | Nbeal1      | -0.46318 | 3.815472 | -2.49619 | 0.024927 | 0.173405 | -3.89117 | 4.283132937 | 3.907728692 | 3.90773294  | 3.791829642 | 3.82746032  | 3.479470761 |
| ENSMUSG0000000881.12    | Dlg3        | -0.46284 | 3.210424 | -2.98518 | 0.00391  | 0.102622 | -2.83848 | 5.58934639  | 3.38943238  | 3.37353905  | 3.024226515 | 2.95640757  | 2.957261443 |
| ENSMUSG00000020156.16   | Mum1        | -0.46251 | 3.640934 | -2.8149  | 0.013234 | 0.125684 | -3.25843 | 3.866812472 | 3.871957531 | 3.8313371   | 3.791829642 | 3.25324226  | 3.23042174  |
| ENSMUSG00000004865.15   | Srp1k       | -0.46214 | 4.708082 | -3.67605 | 0.002306 | 0.045505 | -1.7502  | 4.953973273 | 4.928192765 | 4.92212916  | 4.717611476 | 4.291638109 | 4.439474908 |
| ENSMUSG00000038533.15   | Cfbz2i2     | -0.46136 | 4.458906 | -3.0534  | 0.00818  | 0.095077 | -9.25266 | 4.689488193 | 4.794457963 | 4.56655827  | 4.604486974 | 4.017411289 | 4.081029197 |
| ENSMUSG00000045414.7    | 1190002N15R | -0.46096 | 2.804034 | -2.31162 | 0.035694 | 0.20128  | -3.97908 | 3.339716465 | 3.090031796 | 2.69905445  | 2.657629371 | 2.453862094 | 2.583910046 |
| ENSMUSG00000032601.13   | Prkra2a     | -0.45963 | 3.409968 | -2.57467 | 0.021358 | 0.161151 | -3.65439 | 3.645275488 | 3.835276868 | 3.42065164  | 3.529621758 | 3.02547857  | 3.003505827 |
| ENSMUSG000000029627.1   | Mtf2        | -0.4571  | 4.276481 | -3.34737 | 0.040501 | 0.068326 | -2.34613 | 4.542957786 | 4.521837508 | 4.4293165   | 4.272524377 | 4.075549725 | 3.616700314 |
| ENSMUSG0000000399674.10 | Zfp229      | -0.45667 | 5.148155 | -2.41969 | 0.02895  | 0.184552 | -4.22994 | 5.563693395 | 5.235533323 | 5.31707524  | 5.046919102 | 5.338799957 | 4.386910316 |
| ENSMUSG00000007703.15   | Seleno1     | -0.45666 | 3.663085 | -3.21491 | 0.005893 | 0.080014 | -4.29224 | 3.956387286 | 3.907728662 | 3.79604007  | 3.578366921 | 3.307196471 | 3.306191594 |
| ENSMUSG000000051786.14  | Tubgpcc     | -0.45663 | 3.705003 | -3.25148 | 0.005471 | 0.076896 | -4.24948 | 3.814535193 | 4.095212035 | 3.89112026  | 3.578366921 | 3.417540581 | 3.432359057 |
| ENSMUSG000000078786.9   | BCO24978    | -0.45639 | 2.356088 | -2.28302 | 0.037712 | 0.208879 | -3.92287 | 2.500570476 | 2.571003565 | 2.66032206  | 2.239564179 | 2.05204829  | 2.113019312 |
| ENSMUSG00000024037.12   | Wdr4        | -0.45615 | 2.845439 | -2.64693 | 0.018509 | 0.152003 | -3.38927 | 3.027006901 | 3.069122806 | 3.092772433 | 2.728450708 | 2.605067899 | 2.534370585 |
| ENSMUSG00000021493.15   | Pdlim7      | -0.45599 | 2.93072  | -2.34035 | 0.033769 | 0.197192 | -3.9597  | 3.30981498  | 3.38943238  | 2.80937787  | 2.71106863  | 2.818202352 | 2.546915839 |
| ENSMUSG00000020800.15   | Lrba        | -0.45482 | 3.421695 | -2.66953 | 0.017696 | 0.148505 | -3.48185 | 3.63325296  | 3.771990623 | 3.53211207  | 3.257635752 | 3.425691422 | 2.909485918 |
| ENSMUSG000000059474.15  | Mbt1d       | -0.45437 | 4.533792 | -2.61425 | 0.019749 | 0.155682 | -3.80499 | 4.677829988 | 4.979519345 | 4.60785464  | 4.781457958 | 4.04941323  | 4.106677785 |
| ENSMUSG00000048668.15   | Rhno1       | -0.45348 | 2.525925 | -2.16583 | 0.047149 | 0.219041 | -4.1671  | 2.787668587 | 3.90031796  | 2.51593215  | 2.333431102 | 2.133925297 | 2.45671803  |
| ENSMUSG000000039242.9   | B3galnt2    | -0.45282 | 2.383165 | -2.28747 | 0.037391 | 0.204379 | -3.92145 | 2.500570476 | 2.629302296 | 2.67981823  | 2.239564179 | 2.153688552 | 2.096046203 |
| ENSMUSG00000003964.12   | Zbtb41      | -0.45271 | 3.311033 | -2.40594 | 0.029735 | 0.186632 | -3.93644 | 3.546167343 | 3.705800343 | 3.36151652  | 3.383665405 | 2.702209507 | 3.166842012 |
| ENSMUSG00000027284.16   | Cdn1        | -0.45243 | 2.624392 | -2.38938 | 0.037079 | 0.188787 | -3.80067 | 2.912295242 | 2.791269885 | 2.82697193  | 2.583151155 | 2.230140613 | 2.250242929 |
| ENSMUSG000000054008.8   | Nds1t       | -0.44956 | 4.089232 | -2.40375 | 0.028662 | 0.186992 | -4.11624 | 4.450062575 | 4.35046909  | 4.13666074  | 4.193366956 | 3.367644136 | 4.037244165 |
| ENSMUSG00000020069.16   | Hnrnp3      | -0.44914 | 4.177769 | -3.5859  | 0.00277  | 0.050885 | -1.85269 | 4.52354904  | 4.315386631 | 3.46453156  | 3.925499974 | 3.076485746 | 3.85215887  |
| ENSMUSG00000028282.12   | Casp8ap2    | -0.44905 | 3.896792 | -2.72502 | 0.015843 | 0.139769 | -4.83317 | 4.146014081 | 3.987899011 | 4.17145614  | 4.089580523 | 3.47365246  | 3.51215042  |
| ENSMUSG00000039242.9    | Abi2        | -0.44805 | 3.662396 | -2.79682 | 0.013723 | 0.127971 | -3.2975  | 3.86507464  | 4.031786655 | 3.75066856  | 3.671975903 | 3.489291584 | 3.174947061 |
| ENSMUSG00000006763.12   | Saal1       | -0.44733 | 2.799095 | -2.21712 | 0.042776 | 0.211429 | -4.13981 | 2.787668587 | 3.283973678 | 2.97634955  | 2.891640875 | 2.371868272 | 2.836093657 |
| ENSMUSG000000056919.9   | Cep162      | -0.44657 | 3.154701 | -2.3905  | 0.036762 | 0.188446 | -3.92497 | 3.30981498  | 3.170763068 | 3.57439188  | 3.171294903 | 3.046773348 | 2.655168729 |
| ENSMUSG00000029687.16   | Ezh2        | -0.44615 | 4.64771  | -2.93203 | 0.010455 | 0.109063 | -3.21418 | 4.924678966 | 4.850673973 | 4.81158889  | 4.838601865 | 4.209044777 | 4.251672852 |
| ENSMUSG00000021811.6    | Dnaic9      | -0.44609 | 2.927214 | -2.45587 | 0.026976 | 0.178849 | -3.7226  | 2.912295242 | 3.228478566 | 2.91186082  | 2.657629371 | 2.576068027 | 2.469538857 |
| ENSMUSG000000014850.15  | Msh3        | -0.44565 | 3.453851 | -3.03232 | 0.008537 | 0.097743 | -2.80152 | 3.57158994  | 3.63642664  | 3.81379634  | 3.183950203 | 3.271428821 | 3.245913583 |
| ENSMUSG000000036568.6   | Birc1       | -0.44553 | 2.783072 | -2.19773 | 0.044383 | 0.214943 | -4.16903 | 3.294628576 | 2.685336241 | 3.05310675  | 2.333431102 | 2.576068027 | 2.75862729  |
| ENSMUSG000000031024.15  | Trim33      | -0.44527 | 4.701543 | -3.77188 | 0.001898 | 0.041006 | -1.55776 | 4.958798344 | 4.951230301 | 4.85511241  | 4.655359197 | 4.394885375 | 4.393871464 |
| ENSMUSG000000024135.9   | Srb1d       | -0.44452 | 2.656679 | -2.34762 | 0.033298 | 0.196152 | -3.88101 | 2.932058497 | 2.913605228 | 2.77353267  | 2.657629371 | 2.302744362 | 2.360502714 |
| ENSMUSG000000029461.3   | Fam168a     | -0.44455 | 3.913657 | -3.03114 | 0.008557 | 0.097851 | -2.90089 | 4.17178004  | 4.23185568  | 3.98812672  | 3.910800454 | 3.698850045 | 3.619810643 |
| ENSMUSG00000036893.16   | Ehmt1       | -0.44339 | 4.809383 | -3.36165 | 0.004372 | 0.066975 | -3.3879  | 5.105251212 | 5.1633      |             |             |             |             |

|                        |             |          |          |          |          |          |          |             |             |             |             |             |             |
|------------------------|-------------|----------|----------|----------|----------|----------|----------|-------------|-------------|-------------|-------------|-------------|-------------|
| ENSMUSG00000024350.5   | Dnajc18     | -0.40195 | 3.215639 | -2.21677 | 0.042805 | 0.212429 | -4.2432  | 3.520288711 | 3.04790632  | 3.64552505  | 2.90698884  | 3.197190191 | 2.975937567 |
| ENSMUSG00000045170.14  | Camsap2     | -0.40069 | 4.46138  | -3.11189 | 0.007265 | 0.090174 | -2.83785 | 4.677829988 | 4.735962314 | 4.56131205  | 4.471450888 | 4.227811807 | 4.099910489 |
| ENSMUSG00000020898.18  | Ctc1        | -0.40043 | 3.527891 | -2.21668 | 0.042812 | 0.212429 | -4.32062 | 3.749194439 | 3.835276868 | 3.56393752  | 3.634752662 | 3.417540581 | 2.966629825 |
| ENSMUSG00000021693.19  | Kif2a       | -0.40031 | 3.914159 | -2.39447 | 0.030407 | 0.188388 | -4.09605 | 4.252022405 | 4.195092397 | 3.87427764  | 4.069260269 | 3.601474634 | 3.428228323 |
| ENSMUSG00000005871.4   | Rnf169      | -0.39968 | 3.56391  | -2.7882  | 0.013962 | 0.129196 | -3.29103 | 3.738010701 | 3.664577681 | 3.86579117  | 3.458488581 | 3.271428821 | 3.398546769 |
| ENSMUSG00000025758.10  | Plk4        | -0.39941 | 3.285699 | -2.36972 | 0.031903 | 0.192665 | -3.99334 | 3.439745284 | 3.4549065   | 3.51049826  | 3.394594665 | 3.047121339 | 2.899737941 |
| ENSMUSG000000446574.7  | Prr12       | -0.39838 | 5.061593 | -3.14012 | 0.063861 | 0.087016 | -2.84904 | 5.28120806  | 5.339597185 | 5.155878    | 5.094615845 | 4.805348611 | 4.647908044 |
| ENSMUSG00000075595.9   | Zfp625      | -0.39665 | 4.608609 | -3.24651 | 0.005527 | 0.077252 | -2.59285 | 4.768559764 | 4.990681451 | 4.67253801  | 4.476603379 | 4.304955989 | 4.438318191 |
| ENSMUSG00000022498.16  | Txndc11     | -0.39319 | 2.820881 | -2.15203 | 0.048394 | 0.22073  | -4.25433 | 3.871937504 | 3.90790632  | 3.09727433  | 2.762508926 | 2.702209507 | 2.44359647  |
| ENSMUSG00000055897.13  | Ppp4r1-pp   | -0.39226 | 3.48972  | -2.18592 | 0.045389 | 0.216675 | -3.36359 | 3.877044395 | 3.319818877 | 3.780792    | 3.529621758 | 3.367644136 | 3.071110571 |
| ENSMUSG00000032525.14  | Nktr        | -0.39223 | 5.805978 | -3.32127 | 0.004747 | 0.070695 | -2.52474 | 5.945490371 | 6.086134373 | 5.97536377  | 5.661027947 | 5.776587038 | 5.391264968 |
| ENSMUSG00000032423.12  | Syncrip     | -0.39193 | 5.323405 | -3.73501 | 0.002046 | 0.042346 | -1.68029 | 5.508819184 | 5.523759821 | 5.52269585  | 5.222797328 | 5.11514809  | 5.047210223 |
| ENSMUSG00000057133.14  | Chd6        | -0.39172 | 4.954823 | -2.63341 | 0.019013 | 0.153491 | -3.81779 | 5.214185583 | 5.29976565  | 4.93435546  | 5.018938684 | 4.816653565 | 4.445036225 |
| ENSMUSG00000029202.12  | Pds5a       | -0.39139 | 5.4894   | -3.02913 | 0.008592 | 0.097998 | -3.09243 | 5.842216806 | 5.580269461 | 5.62681279  | 5.518423552 | 5.310468178 | 5.058206427 |
| ENSMUSG00000027804.13  | Ppid        | -0.39054 | 3.46073  | -2.43792 | 0.027939 | 0.181144 | -3.91424 | 3.877044395 | 3.533333147 | 3.55340685  | 3.372652412 | 3.078137519 | 3.349802826 |
| ENSMUSG00000022526.7   | Zfp251      | -0.3898  | 2.730127 | -2.17412 | 0.046415 | 0.217853 | -4.19507 | 2.951554672 | 2.95977541  | 2.86152915  | 2.639967164 | 2.421621757 | 2.546915839 |
| ENSMUSG00000024188.15  | Luc7f       | -0.38878 | 4.675857 | -2.83731 | 0.012652 | 0.122318 | -3.39985 | 4.80116443  | 4.933986728 | 4.8593934   | 4.726289637 | 4.53332145  | 4.200978351 |
| ENSMUSG000000010106.12 | Ifi2        | -0.38846 | 4.553405 | -3.00094 | 0.009097 | 0.100476 | -3.06739 | 4.843521822 | 4.715924561 | 4.66766403  | 4.575967596 | 4.348487802 | 4.168872547 |
| ENSMUSG00000026355.11  | Mcm6        | -0.38745 | 4.572302 | -3.26397 | 0.005334 | 0.075795 | -2.55352 | 4.718228089 | 4.838369463 | 4.73909917  | 4.507137744 | 4.23710546  | 4.393871464 |
| ENSMUSG00000056342.16  | Usp34       | -0.38736 | 5.477867 | -3.19812 | 0.006098 | 0.081642 | -2.75922 | 5.807865301 | 5.638202265 | 5.65254846  | 5.475316978 | 5.277070968 | 5.103496538 |
| ENSMUSG00000025236.11  | Ube3a       | -0.38705 | 5.083453 | -3.32639 | 0.004698 | 0.070353 | -2.48186 | 5.395944256 | 5.207104915 | 5.22053789  | 5.053830228 | 4.847317738 | 4.775984325 |
| ENSMUSG00000015488.14  | Cacfd1      | -0.38409 | 4.258003 | -2.86086 | 0.012067 | 0.119363 | -3.2927  | 4.408343185 | 4.418173949 | 4.49682332  | 4.324885923 | 4.316912213 | 3.982879177 |
| ENSMUSG00000028496.17  | Mllt3       | -0.38405 | 3.966773 | -2.73226 | 0.015616 | 0.138685 | -3.48331 | 3.946705272 | 4.324237549 | 4.19874197  | 3.918393603 | 3.664822641 | 3.747734848 |
| ENSMUSG00000043610.14  | Zcchc11     | -0.38291 | 5.801262 | -2.17618 | 0.046234 | 0.217853 | -4.65706 | 5.455193683 | 5.272586918 | 5.0881836   | 4.912702491 | 4.815035299 | 4.45205494  |
| ENSMUSG00000030978.15  | Rrm1        | -0.38241 | 4.202311 | -2.54345 | 0.022715 | 0.166062 | -3.91876 | 4.677829988 | 4.762253612 | 4.38842767  | 4.541963109 | 4.073061639 | 4.081029198 |
| ENSMUSG0000002142.7    | Nup155      | -0.38151 | 4.105484 | -2.22144 | 0.042425 | 0.212176 | -4.44119 | 4.456900005 | 4.223756155 | 4.16455328  | 4.324885993 | 3.875857144 | 3.5869505   |
| ENSMUSG00000042323.16  | Pbrm1       | -0.38046 | 5.358837 | -3.32581 | 0.004703 | 0.070356 | -2.50025 | 5.563693395 | 5.620346901 | 5.46205791  | 5.343336845 | 5.034833735 | 5.128752328 |
| ENSMUSG00000028580.15  | Pum1        | -0.38003 | 5.312914 | -3.27817 | 0.005182 | 0.07461  | -2.59251 | 5.554160134 | 5.527596778 | 5.42499058  | 5.306196191 | 4.961043474 | 5.103496538 |
| ENSMUSG00000028901.13  | Gmeb1       | -0.3793  | 3.293756 | -2.22973 | 0.01476  | 0.211919 | -4.2406  | 3.771305141 | 3.422301835 | 3.2744309   | 3.132648975 | 2.970824295 | 3.019121824 |
| ENSMUSG00000034781.5   | Gna11       | -0.37905 | 3.408177 | -2.4315  | 0.028291 | 0.182324 | -3.91265 | 3.600309098 | 3.56354776  | 3.58477102  | 3.426895457 | 3.225497235 | 3.039462705 |
| ENSMUSG00000025134.2   | Alyrf       | -0.37824 | 4.467519 | -3.11196 | 0.007264 | 0.090174 | -2.83852 | 4.599664891 | 4.844534836 | 4.54013449  | 4.29603113  | 4.227811807 | 4.296937586 |
| ENSMUSG00000028433.14  | Ubp2        | -0.37789 | 4.657325 | -2.2762  | 0.005203 | 0.07483  | -2.53984 | 4.76855976  | 4.968270204 | 4.80272438  | 4.561492274 | 4.431774474 | 4.11128787  |
| ENSMUSG00000022194.15  | Pabpn1      | -0.37691 | 3.945743 | -2.65869 | 0.018082 | 0.150179 | -3.61722 | 4.067776506 | 4.175661867 | 4.15064768  | 3.749887879 | 3.968036678 | 3.562445537 |
| ENSMUSG00000015882.17  | Lcor1       | -0.37635 | 3.60789  | -2.60177 | 0.020243 | 0.157832 | -3.64948 | 3.782234701 | 3.883980059 | 3.72274456  | 3.54931756  | 3.262355237 | 3.446710856 |
| ENSMUSG000000056342.16 | Arid2       | -0.37633 | 5.250424 | -2.56473 | 0.021781 | 0.162831 | -3.9693  | 5.560522636 | 5.452890155 | 5.29512076  | 5.340513566 | 5.104130447 | 4.713366976 |
| ENSMUSG00000055296.14  | Tmem245     | -0.37619 | 3.771873 | -2.42687 | 0.028547 | 0.182941 | -4.00636 | 3.980505184 | 4.165847577 | 3.73211274  | 3.800073636 | 3.481492313 | 3.466562627 |
| ENSMUSG00000041859.10  | Mcm3        | -0.37489 | 4.226146 | -2.62696 | 0.019257 | 0.154094 | -3.73085 | 4.401271136 | 4.674994296 | 4.17826312  | 4.161730039 | 4.035009991 | 3.907055092 |
| ENSMUSG00000034636.9   | Zygl11b     | -0.37452 | 4.415115 | -3.03052 | 0.008568 | 0.097851 | -2.98971 | 4.555753392 | 4.611335659 | 4.62304104  | 4.418887878 | 4.170762066 | 4.110908565 |
| ENSMUSG0000004173.7    | Enc1        | -0.37413 | 4.810359 | -2.8074  | 0.013435 | 0.126604 | -4.47285 | 5.185656786 | 5.123375565 | 4.70144104  | 4.575967596 | 4.610441071 | 4.665272688 |
| ENSMUSG00000085438.11  | 170002014Ri | -0.37366 | 5.11454  | -2.63012 | 0.019137 | 0.153774 | -3.83739 | 5.388811015 | 5.158442796 | 5.34482023  | 5.191803761 | 4.603272385 | 5.00088467  |
| ENSMUSG00000043610.14  | Lkbpk       | -0.37356 | 4.521036 | -2.40637 | 0.029117 | 0.186632 | -4.18477 | 4.795781233 | 4.715924561 | 4.592506627 | 4.571158606 | 4.491234608 | 3.959609397 |
| ENSMUSG00000051329.13  | Nup160      | -0.37296 | 3.89661  | -2.26429 | 0.030901 | 0.207745 | -4.32294 | 4.283132937 | 4.020939272 | 3.92417408  | 4.027740999 | 4.256914222 | 3.697981813 |
| ENSMUSG00000041852.14  | Tcf20       | -0.37254 | 5.953901 | -3.03655 | 0.008464 | 0.097312 | -3.80035 | 5.696124111 | 5.932540417 | 5.59122207  | 5.505878298 | 5.402132513 | 5.19202575  |
| ENSMUSG00000046434.11  | Hnrnpa1     | -0.37245 | 5.367144 | -2.96041 | 0.009873 | 0.105736 | -3.22081 | 5.582572989 | 5.638202265 | 5.43649768  | 5.436183802 | 5.102492799 | 5.006915112 |
| ENSMUSG00000037234.16  | Hook3       | -0.37194 | 4.630024 | -3.22434 | 0.005782 | 0.079328 | -2.63889 | 4.843521822 | 4.762253612 | 4.83351477  | 4.556631471 | 4.322526269 | 4.646195706 |
| ENSMUSG00000036676.14  | Tmtc3       | -0.37169 | 3.261607 | -2.33538 | 0.034095 | 0.198317 | -4.04829 | 3.493937384 | 3.47093661  | 3.38546221  | 3.145646315 | 2.896541262 | 3.18306831  |
| ENSMUSG0000004099.15   | Dnmt1       | -0.37163 | 5.45368  | -2.8803  | 0.011604 | 0.115859 | -3.88052 | 5.502223995 | 5.87647728  | 5.54146724  | 5.436186802 | 5.290593466 | 5.086410387 |
| ENSMUSG00000022191.15  | Drosha      | -0.37111 | 4.542468 | -2.67087 | 0.017649 | 0.148202 | -3.69912 | 4.695282157 | 4.922375438 | 4.57178538  | 4.517139924 | 4.443864168 | 4.115126975 |
| ENSMUSG00000039219.17  | Arid4b      | -0.37108 | 4.757967 | -3.25018 | 0.005486 | 0.076935 | -2.60281 | 5.061061079 | 4.819713663 | 4.94244914  | 4.632458795 | 4.506685305 | 4.585431074 |
| ENSMUSG00000039585.15  | Myo9a       | -0.36975 | 4.485133 | -2.151   | 0.048489 | 0.220866 | -4.63051 | 4.654227089 | 4.819713663 | 4.5454851   | 4.193363562 | 4.733735562 | 3.964293476 |
| ENSMUSG00000020721.16  | Helz        | -0.36956 | 4.323383 | -2.64085 | 0.018734 | 0.152448 | -3.72104 | 4.542957786 | 4.442765937 | 4.5077362   | 4.408141497 | 4.141368281 | 3.982790621 |
| ENSMUSG00000026623.16  | Lgpat1      | -0.36885 | 4.050216 | -2.69561 | 0.0168   | 0.144532 | -3.56897 | 4.290806865 | 4.35046909  | 4.07167451  | 3.992204842 | 3.698850045 | 3.892790621 |
| ENSMUSG00000037236.14  | Matr3       | -0.36873 | 5.761747 | -3.49246 | 0.00335  | 0.065901 | -2.182   | 5.627203583 | 5.842995961 | 6.02575179  | 5.645098976 | 5.58610262  | 5.5382657   |
| ENSMUSG00000040390.13  | Map3k10     | -0.36778 | 3.421805 | -2.43474 | 0.028113 | 0.181717 | -3.91039 | 3.467095772 | 3.664577681 | 3.69426939  | 3.196495457 | 3.158587352 | 3.349802826 |
| ENSMUSG00000036197.11  | Gyxl1       | -0.36738 | 3.96434  | -2.44283 | 0.027672 | 0.18028  | -4.01291 | 4.179469378 | 4.053239764 | 4.10810814  | 3.984991352 | 3.465768861 | 3.827023758 |
| ENSMUSG00000020576.9   | Nbas        | -0.36735 | 3.976098 | -2.35919 | 0.03256  | 0.194277 | -4.17157 | 4.187133372 | 4.185409844 | 4.07167451  | 4.135909304 | 3.732093337 | 3.543789733 |
| ENSMUSG00000024236.17  | Svll        | -0.36647 | 3.808375 | -2.70358 | 0.016536 | 0.142878 | -3.50403 | 3.946705272 | 4.048832889 | 3.94042998  | 3.68013677  | 3.698850045 | 3.499297884 |
| ENSMUSG00000036054.15  | Supg2       | -0.36516 | 4.042326 | -2.84774 | 0.01239  | 0.207737 | -2.87827 | 4.29844019  | 4.155966066 | 4.20548355  | 3.992204842 | 3.764587842 | 3.827738514 |
| ENSMUSG00000038241.11  | Cep250      | -0.36332 | 4.802824 | -2.5722  | 0.021462 | 0.161255 | -3.91641 | 5.126488846 | 4.945505313 | 4.8721607   | 4.743490107 | 4.813550994 | 4.315386623 |
| ENSMUSG00000058013.11  | Sept15      | -0.36305 | 5.671261 | -3.30187 | 0.004938 | 0.072641 | -2.56    | 5.91051003  | 5.964029059 | 5.68585715  | 5.53580563  | 5.476597739 | 4.54222736  |
| ENSMUSG00000000631.11  | Myo18a      | -0.36296 | 4.879992 | -3.41123 |          |          |          |             |             |             |             |             |             |

|                        |          |          |          |          |          |          |          |             |             |             |             |             |             |
|------------------------|----------|----------|----------|----------|----------|----------|----------|-------------|-------------|-------------|-------------|-------------|-------------|
| ENSMUSG00000039512.11  | Uhrf1bp1 | -0.31976 | 4.140317 | -2.4275  | 0.028513 | 0.182805 | -4.08085 | 4.313586734 | 4.34177813  | 4.23213918  | 4.135909304 | 4.017411289 | 3.801075306 |
| ENSMUSG000000027218.11 | Cse1l    | -0.31944 | 4.709472 | -2.7324  | 0.038426 | 0.062263 | -4.44778 | 4.817194539 | 4.962612569 | 4.81600081  | 4.878076144 | 4.331226738 | 4.45172312  |
| ENSMUSG000000030016.14 | Pax1p1   | -0.31883 | 3.827294 | -2.3874  | 0.030827 | 0.189038 | -0.08843 | 3.907311834 | 4.063847864 | 3.98028596  | 3.758374344 | 3.58353238  | 3.56861091  |
| ENSMUSG000000024542.8  | Cep192   | -0.31795 | 4.545036 | -2.14259 | 0.049264 | 0.222208 | -6.65259 | 4.859090625 | 4.537144761 | 4.68706194  | 4.618542015 | 4.48734594  | 4.081029194 |
| ENSMUSG000000046841.4  | Ckap4    | -0.31664 | 3.832476 | -2.43399 | 0.028154 | 0.181809 | -0.00579 | 4.03159417  | 4.010009712 | 3.93232493  | 3.724124782 | 3.615794039 | 3.681008738 |
| ENSMUSG00000005846.11  | Rsl1d1   | -0.31637 | 4.284487 | -2.51108 | 0.024209 | 0.170977 | -3.95493 | 4.483930211 | 4.529511436 | 4.32173662  | 4.218190528 | 3.984683344 | 4.168872547 |
| ENSMUSG000000036698.0  | Agol2    | -0.31559 | 5.523812 | -2.48324 | 0.025569 | 0.175411 | -4.13404 | 5.690938867 | 5.900349132 | 5.45924014  | 5.480455701 | 5.216022486 | 5.160262815 |
| ENSMUSG000000035342.13 | Lts2     | -0.31574 | 3.742118 | -1.13669 | 0.049815 | 0.222753 | -5.0716  | 3.856507464 | 3.942634277 | 3.84727764  | 3.848572153 | 3.457841945 | 3.473243927 |
| ENSMUSG00000001151.9   | Pcnt     | -0.31544 | 4.201697 | -2.30123 | 0.036415 | 0.202683 | -3.18189 | 4.328575908 | 4.442765937 | 4.29037245  | 4.284327568 | 3.006584258 | 3.006584258 |
| ENSMUSG000000066324.2  | Impad1   | -0.31536 | 4.821246 | -2.50437 | 0.024853 | 0.171946 | -0.04348 | 5.105251122 | 4.89293166  | 4.93029153  | 4.842598252 | 4.459827761 | 4.696574992 |
| ENSMUSG000000040945.13 | Rcc2     | -0.31445 | 5.857994 | -2.79355 | 0.013813 | 0.128301 | -3.5596  | 5.967203583 | 6.20351165  | 5.87744724  | 5.761543943 | 5.662237937 | 5.670260044 |
| ENSMUSG00000020994.4   | Pnn      | -0.31335 | 4.898588 | -2.82605 | 0.012941 | 0.124043 | -3.44519 | 5.042998933 | 4.996230285 | 5.11707457  | 4.858474011 | 4.697167601 | 4.679585256 |
| ENSMUSG000000079003.1  | Samd1    | -0.31251 | 3.653586 | -2.18328 | 0.045616 | 0.217113 | -4.40692 | 3.985051584 | 3.732641955 | 3.70382369  | 3.56874809  | 3.504762993 | 3.426468528 |
| ENSMUSG000000030016.14 | Zfp638   | -0.31203 | 5.393249 | -2.77968 | 0.014203 | 0.130538 | -3.57069 | 5.601208706 | 5.472927908 | 5.56786679  | 5.406792553 | 5.184036643 | 5.126664401 |
| ENSMUSG000000026014.15 | Raph1    | -0.30971 | 4.377661 | -2.54702 | 0.022556 | 0.165758 | -3.90393 | 4.497257742 | 4.529511436 | 4.56131205  | 4.353175037 | 4.08072068  | 4.243988706 |
| ENSMUSG000000043535.13 | Setx     | -0.30846 | 4.761242 | -2.45013 | 0.027281 | 0.17995  | -4.13599 | 5.14389714  | 4.715924561 | 4.87639148  | 4.686821083 | 4.540855995 | 4.603559418 |
| ENSMUSG000000049658.13 | Bdp1     | -0.30762 | 4.426176 | -2.15897 | 0.047764 | 0.220003 | -4.60625 | 4.683670867 | 4.574717068 | 4.47467018  | 4.502093351 | 3.984683344 | 4.33721849  |
| ENSMUSG000000025986.6  | Slc39a10 | -0.3074  | 4.182425 | -2.32781 | 0.034597 | 0.195907 | -4.26278 | 4.244138805 | 4.521837508 | 4.24528456  | 4.17446691  | 3.939685814 | 3.968962396 |
| ENSMUSG000000054766.13 | Set      | -0.3058  | 5.992429 | -2.76005 | 0.014772 | 0.133664 | -3.62539 | 6.007346624 | 6.285107427 | 6.14452158  | 5.938137538 | 5.768598673 | 5.180860749 |
| ENSMUSG000000050953.9  | Gja1     | -0.30506 | 4.768681 | -2.58292 | 0.021012 | 0.159596 | -3.89178 | 4.779510064 | 5.029082446 | 4.95450516  | 4.70888107  | 4.495112823 | 4.644993508 |
| ENSMUSG000000057376.10 | Rc3h2    | -0.30476 | 5.098477 | -2.52911 | 0.023366 | 0.16819  | -0.02389 | 5.265715884 | 5.369834415 | 5.11707457  | 5.13428006  | 4.865408195 | 4.838550011 |
| ENSMUSG000000020029.5  | Nudt4    | -0.30376 | 4.328617 | -2.23722 | 0.041168 | 0.21069  | -4.4543  | 5.02957786  | 4.654085307 | 4.25831124  | 4.301848457 | 4.033509096 | 4.180996106 |
| ENSMUSG000000021327.18 | Zkscan3  | -0.30364 | 4.423216 | -2.36181 | 0.032395 | 0.193723 | -4.24883 | 4.677829988 | 4.384718652 | 4.64304406  | 4.391870328 | 4.126434176 | 4.315866623 |
| ENSMUSG000000022031.5  | Elp3     | -0.30219 | 3.917089 | -2.39961 | 0.030104 | 0.187803 | -0.08584 | 4.049798765 | 4.053239764 | 4.10089465  | 3.749858739 | 3.758147229 | 3.79056382  |
| ENSMUSG00000004830.18  | Ncbp1    | -0.30153 | 4.070092 | -2.29382 | 0.036937 | 0.203223 | -3.30608 | 4.22841179  | 4.279429753 | 4.15064768  | 4.076065446 | 3.764587844 | 3.92157899  |
| ENSMUSG000000029470.13 | Aff4     | -0.30086 | 5.749961 | -2.92629 | 0.010577 | 0.109854 | -3.30093 | 5.943057495 | 5.92383197  | 5.83460237  | 5.670051587 | 5.569645842 | 5.558578756 |
| ENSMUSG000000039100.9  | Mar-06   | -0.30006 | 5.68221  | -2.81893 | 0.013128 | 0.125115 | -3.50679 | 5.794432289 | 5.849141636 | 5.8518933   | 5.663289225 | 5.43278527  | 5.501716419 |
| ENSMUSG000000021068.15 | Nin      | -0.29943 | 4.053239 | -2.32197 | 0.034989 | 0.200218 | -4.25273 | 4.259863158 | 4.214264707 | 4.1295347   | 4.034744387 | 3.783738942 | 3.872790621 |
| ENSMUSG000000048578.11 | Mlec     | -0.29815 | 5.38256  | -2.70323 | 0.016547 | 0.142887 | -3.71579 | 5.582572989 | 5.561677773 | 5.45075367  | 5.343336845 | 5.094845978 | 5.262172167 |
| ENSMUSG000000034252.14 | Semp6    | -0.29805 | 4.849669 | -2.40122 | 0.03001  | 0.187565 | -4.23478 | 4.94913201  | 5.076999232 | 4.9624869   | 4.901252447 | 4.707232957 | 4.500106669 |
| ENSMUSG000000018474.17 | Chd3     | -0.2968  | 6.199012 | -2.5867  | 0.039514 | 0.208294 | -5.55134 | 6.425001653 | 6.412997248 | 6.20632403  | 6.120356696 | 6.267466148 | 5.71928737  |
| ENSMUSG000000039982.7  | Dtx4     | -0.29663 | 4.842503 | -2.16272 | 0.047427 | 0.219621 | -4.65606 | 5.061061079 | 4.904781378 | 4.906802027 | 5.001171279 | 4.455853392 | 4.642073072 |
| ENSMUSG000000032777.9  | Gtf3c1   | -0.29639 | 5.201747 | -2.27227 | 0.038497 | 0.206554 | -4.49707 | 5.28120806  | 5.561677773 | 5.21051914  | 5.166520397 | 5.162250566 | 4.82830901  |
| ENSMUSG000000005410.5  | Mcm5     | -0.29503 | 4.294063 | -2.39344 | 0.030467 | 0.188438 | -4.17022 | 4.510463281 | 4.376232186 | 4.42354572  | 4.29603113  | 4.059927126 | 4.098178821 |
| ENSMUSG000000032555.9  | Topp1p   | -0.29262 | 4.744427 | -2.58484 | 0.020933 | 0.159528 | -3.88518 | 4.86937264  | 4.990681451 | 4.16000881  | 4.673421343 | 4.510522262 | 4.606558785 |
| ENSMUSG000000045482.15 | Trrap    | -0.29225 | 6.13259  | -2.27602 | 0.038222 | 0.205878 | -4.52058 | 6.333228266 | 6.296396178 | 6.20800354  | 5.987700639 | 6.249211163 | 5.720998465 |
| ENSMUSG000000029863.3  | Casp2    | -0.29158 | 4.213869 | -2.40685 | 0.029683 | 0.186632 | -4.13151 | 4.422384123 | 4.26110957  | 4.38482767  | 4.089580253 | 4.006584258 | 4.115216975 |
| ENSMUSG000000033364.13 | Usp37    | -0.29138 | 3.870409 | -2.26048 | 0.039377 | 0.208097 | -3.32225 | 3.994480997 | 4.010009712 | 4.0342969   | 3.766811182 | 3.764587823 | 3.652268839 |
| ENSMUSG000000045098.18 | Kmt5b    | -0.29052 | 4.715805 | -2.58256 | 0.021027 | 0.159596 | -3.88587 | 4.884670994 | 4.788074346 | 4.90979836  | 4.522165953 | 4.251972728 | 4.668146583 |
| ENSMUSG000000049739.10 | Zfp646   | -0.29042 | 4.59461  | -2.40929 | 0.029542 | 0.186335 | -4.18876 | 4.853919669 | 4.755725569 | 4.60785464  | 4.566333537 | 4.435815639 | 4.34801177  |
| ENSMUSG000000021670.14 | Hmgcr    | -0.28866 | 5.451921 | -2.65823 | 0.018098 | 0.150179 | -3.80428 | 5.601208706 | 5.580269461 | 5.60403292  | 5.459799066 | 5.258363069 | 5.258363069 |
| ENSMUSG000000044791.16 | Setd2    | -0.28823 | 5.815082 | -2.64629 | 0.018533 | 0.152011 | -3.83873 | 5.860380473 | 5.941196614 | 6.07443918  | 5.761543943 | 5.56411827  | 5.688812857 |
| ENSMUSG000000034525.6  | Ice1     | -0.28672 | 4.617444 | -2.25162 | 0.040051 | 0.208688 | -4.4734  | 4.774053303 | 4.781662358 | 4.72039297  | 4.541963109 | 4.638764828 | 4.638735895 |
| ENSMUSG000000021555.4  | Naa35    | -0.28654 | 4.535974 | -2.49312 | 0.025078 | 0.173779 | -0.02726 | 4.712525729 | 4.58211552  | 4.73909917  | 4.364337144 | 4.352759899 | 4.465004641 |
| ENSMUSG000000022000.10 | Zc3h13   | -0.28652 | 4.809747 | -2.47062 | 0.026208 | 0.176849 | -4.10378 | 4.968400344 | 4.788074346 | 5.0881836   | 4.721956446 | 4.652720874 | 4.639146711 |
| ENSMUSG000000026491.13 | Ahctf1   | -0.28485 | 4.843691 | -2.17386 | 0.046438 | 0.217853 | -6.63695 | 5.05656698  | 5.11319778  | 4.78932464  | 4.912702491 | 4.638764828 | 4.55192326  |
| ENSMUSG000000046311.13 | Zfp62    | -0.28309 | 4.175318 | -2.33249 | 0.034285 | 0.198803 | -2.2575  | 4.379844578 | 4.242553751 | 4.32173662  | 4.076065446 | 3.968036678 | 4.063732529 |
| ENSMUSG000000030541.16 | Ihd2     | -0.283   | 4.627955 | -2.45925 | 0.026798 | 0.178198 | -4.1024  | 4.827783174 | 4.838369463 | 4.64801178  | 4.541963109 | 4.432436205 | 4.487957091 |
| ENSMUSG000000015697.14 | Setd1b   | -0.28252 | 4.723448 | -2.3939  | 0.03044  | 0.18841  | -4.2331  | 4.899804298 | 4.813441066 | 4.68791748  | 4.75201418  | 4.555786996 | 4.45172312  |
| ENSMUSG000000022100.13 | Xpo7     | -0.28213 | 4.748977 | -2.292   | 0.037066 | 0.203267 | -4.4188  | 4.822498571 | 4.874972569 | 4.95850155  | 4.822504682 | 4.463791212 | 4.55192326  |
| ENSMUSG000000022682.7  | Rrn3     | -0.27948 | 4.12026  | -2.23472 | 0.041364 | 0.211294 | -4.41949 | 4.162838703 | 4.315386631 | 4.30300005  | 4.006524153 | 3.87706862  | 4.01050979  |
| ENSMUSG000000024384.3  | Iws1     | -0.27664 | 4.860776 | -2.59543 | 0.020499 | 0.180088 | -3.87816 | 4.992129415 | 5.029082446 | 4.9783191   | 4.726289367 | 4.687031529 | 4.751804512 |
| ENSMUSG000000057230.13 | Aak1     | -0.27394 | 4.438545 | -2.21537 | 0.042919 | 0.212526 | -5.05985 | 4.71052945  | 4.5063661   | 4.50773662  | 4.455882086 | 4.227818107 | 4.238815198 |
| ENSMUSG000000038416.14 | Cdc16    | -0.27205 | 4.290266 | -2.22959 | 0.041771 | 0.211919 | -4.46016 | 4.365381349 | 4.537144761 | 4.37652909  | 4.260625794 | 4.091007319 | 4.110908565 |
| ENSMUSG000000003119.14 | Kad12    | -0.27126 | 4.702846 | -2.27904 | 0.038001 | 0.205148 | -4.43583 | 4.80116443  | 4.844534836 | 4.8593934   | 4.75201418  | 4.439845516 | 5.20125538  |
| ENSMUSG000000063273.11 | Naa15    | -0.27006 | 5.427247 | -2.47787 | 0.025839 | 0.176099 | -4.13904 | 5.475537546 | 5.594972213 | 5.61420174  | 5.404090876 | 5.17681111  | 4.527065662 |
| ENSMUSG000000022119.13 | Rbm26    | -0.26956 | 4.889185 | -2.48075 | 0.025694 | 0.175641 | -4.0934  | 5.033882347 | 4.996230285 | 5.03618896  | 4.850557969 | 4.693796817 | 4.724454043 |
| ENSMUSG000000041530.16 | Agol1    | -0.26853 | 5.847863 | -2.45512 | 0.027016 | 0.192024 | -4.1948  | 5.913384409 | 6.035833488 | 5.99689693  | 5.831581437 | 5.562721029 | 5.747055524 |
| ENSMUSG000000027665.13 | Pik3ca   | -0.26686 | 4.848543 | -2.33022 | 0.034436 | 0.199179 | -3.36206 | 5.07446082  | 4.874972569 | 4.99397944  | 4.713252877 | 4.6140121   | 4.820580288 |
| ENSMUSG000000050609.15 | Ctr9     | -0.26618 | 4.453175 | -2.28096 | 0.037861 | 0.205029 | -3.97323 | 4.561108887 | 4.695604576 | 4.50773662  | 4.369885978 | 4.264628989 | 4.319048287 |
| ENSMUSG000000024120.12 | Lrrpcr   | -0.26583 | 4.49     |          |          |          |          |             |             |             |             |             |             |

|                        |          |          |          |          |          |          |          |             |             |            |             |             |             |
|------------------------|----------|----------|----------|----------|----------|----------|----------|-------------|-------------|------------|-------------|-------------|-------------|
| ENSMUSG00000029265.4   | Dr1      | 0.248775 | 6.354469 | 2.219648 | 0.04257  | 0.212347 | -4.61512 | 6.284094413 | 6.062526109 | 6.34099852 | 6.41016255  | 6.452366815 | 6.576663182 |
| ENSMUSG00000029310.13  | Nudt9    | 0.249014 | 5.71207  | 2.156305 | 0.048006 | 0.220331 | -4.71725 | 5.505525358 | 5.488760111 | 5.76328863 | 5.784577289 | 5.765390901 | 5.964877918 |
| ENSMUSG000000166.10    | Ttc9c    | 0.249334 | 5.984581 | 2.304766 | 0.036168 | 0.202683 | -4.46311 | 5.786312033 | 5.780054898 | 6.01043438 | 6.087055851 | 6.081365748 | 6.162262831 |
| ENSMUSG00000070427.3   | I18bp    | 0.249503 | 7.61635  | 2.148991 | 0.048673 | 0.220972 | -4.71163 | 7.5001568   | 7.328092815 | 7.64769243 | 7.69706577  | 7.688937475 | 7.863156291 |
| ENSMUSG00000031608.13  | Galnt7   | 0.249628 | 5.859364 | 2.192207 | 0.044851 | 0.215717 | -4.65904 | 5.842216806 | 5.569143223 | 5.78820236 | 5.926888397 | 5.916189728 | 6.135465127 |
| ENSMUSG00000035158.15  | Mitf     | 0.249636 | 5.980146 | 2.140694 | 0.04944  | 0.222432 | -4.75041 | 5.823821538 | 5.687052713 | 6.05030086 | 6.085370646 | 6.038038505 | 6.197501377 |
| ENSMUSG000000069682.5  | Gm10275  | 0.250687 | 6.906733 | 2.189918 | 0.045046 | 0.216249 | -4.65933 | 6.857153688 | 6.626621446 | 6.68099551 | 7.079032647 | 6.891575782 | 7.143835062 |
| ENSMUSG00000017831.7   | Rab5a    | 0.250843 | 6.638665 | 2.334544 | 0.03415  | 0.198465 | -4.4114  | 6.286015446 | 6.167078021 | 6.27523218 | 6.444751664 | 6.410883946 | 6.629226192 |
| ENSMUSG00000028525.16  | Pde4b    | 0.250877 | 6.665474 | 2.200612 | 0.04041  | 0.214453 | -4.64521 | 6.447490161 | 6.4679445   | 6.70322828 | 6.726835006 | 6.724267135 | 6.923083521 |
| ENSMUSG00000040940.18  | Arhgef1  | 0.251301 | 6.391885 | 2.147496 | 0.04881  | 0.221249 | -4.74602 | 6.247100206 | 6.104232935 | 6.44578008 | 6.543805329 | 6.397477482 | 6.612911811 |
| ENSMUSG0000000308.14   | Keap1    | 0.251415 | 6.57602  | 2.14293  | 0.049232 | 0.222208 | -4.74031 | 6.524362973 | 6.264562372 | 6.55933981 | 6.583158616 | 6.693374915 | 6.83118531  |
| ENSMUSG00000057531.13  | Dtnb1    | 0.251778 | 6.409148 | 2.206703 | 0.043632 | 0.213843 | -4.63744 | 6.227241736 | 6.176883972 | 6.44293032 | 6.43552047  | 6.505243811 | 6.667069543 |
| ENSMUSG000000058126.6  | Tpm3-rs7 | 0.251795 | 7.411967 | 2.21233  | 0.043168 | 0.212903 | -4.60759 | 7.29319662  | 7.154105724 | 7.41084106 | 7.465956132 | 7.483690769 | 7.664013556 |
| ENSMUSG000000036057.11 | Ptpn23   | 0.251815 | 6.205252 | 2.300523 | 0.036464 | 0.202683 | -4.47241 | 6.046402856 | 5.986505775 | 6.20295915 | 6.232728548 | 6.434301528 | 6.328616172 |
| ENSMUSG00000024566.8   | Atp9b    | 0.251855 | 6.415654 | 2.274758 | 0.038314 | 0.206068 | -4.51771 | 6.303190589 | 6.132222606 | 6.43291156 | 6.571760609 | 6.481004413 | 6.572834371 |
| ENSMUSG000000040712.16 | Camta2   | 0.252037 | 6.328414 | 2.344545 | 0.033496 | 0.196453 | -4.39365 | 6.270575084 | 6.070438533 | 6.26397363 | 6.387089795 | 6.448371811 | 6.530032835 |
| ENSMUSG00000029518.13  | Rab35    | 0.252125 | 6.161635 | 2.301304 | 0.036409 | 0.202683 | -4.47088 | 5.97912675  | 5.92383197  | 6.20127376 | 6.268861661 | 6.266331954 | 6.330431454 |
| ENSMUSG000000043131.14 | Mob1a    | 0.252497 | 7.513014 | 2.149687 | 0.048609 | 0.220972 | -4.7134  | 7.27299856  | 7.312609546 | 7.57471736 | 7.544725423 | 7.628875621 | 7.74416445  |
| ENSMUSG00000066568.12  | Lsm14a   | 0.252645 | 6.582692 | 2.196619 | 0.044476 | 0.214943 | -4.6533  | 6.489776161 | 6.282839038 | 6.59443412 | 6.622614962 | 6.682361922 | 6.824127748 |
| ENSMUSG000000032905.4  | Atg12    | 0.253012 | 5.522294 | 2.207005 | 0.043607 | 0.213843 | -4.62149 | 5.417134772 | 5.235533323 | 5.52808407 | 5.591947614 | 5.591546759 | 5.769972758 |
| ENSMUSG00000030720.12  | Cln3     | 0.253067 | 6.345251 | 2.13575  | 0.049903 | 0.222753 | -4.76061 | 6.188740567 | 6.080921377 | 6.38323411 | 6.395275321 | 6.378707399 | 6.644628776 |
| ENSMUSG00000004062.12  | Os9      | 0.253252 | 7.116186 | 2.307835 | 0.035955 | 0.202085 | -4.44682 | 6.94731234  | 6.899609108 | 7.12198246 | 7.213954566 | 7.147324298 | 7.334733616 |
| ENSMUSG000000017466.9  | Timp2    | 0.253522 | 7.169303 | 2.209233 | 0.043423 | 0.213518 | -4.6195  | 7.058253732 | 6.877229719 | 7.192393   | 7.221647006 | 7.279602753 | 7.386692238 |
| ENSMUSG00000002233.13  | Rhoc     | 0.254602 | 7.430933 | 2.14958  | 0.048619 | 0.220972 | -4.71589 | 7.26330468  | 7.16646293  | 7.48267068 | 7.50177749  | 7.478807578 | 7.635858094 |
| ENSMUSG00000001418.13  | Glmp     | 0.254661 | 6.75778  | 2.143619 | 0.049169 | 0.222153 | -4.74232 | 6.569225511 | 6.477894161 | 6.84831397 | 6.847080996 | 6.818589289 | 6.990074678 |
| ENSMUSG000000057193.7  | C134a2   | 0.255033 | 6.041134 | 2.152883 | 0.048317 | 0.220594 | -4.7301  | 5.94602051  | 5.697308882 | 6.09818026 | 6.093717797 | 6.228395329 | 6.818521919 |
| ENSMUSG00000024835.14  | Coro1b   | 0.25542  | 8.127424 | 2.171634 | 0.046634 | 0.217969 | -4.65757 | 7.988299901 | 7.872334756 | 8.13858953 | 8.184540706 | 8.182684609 | 8.398907024 |
| ENSMUSG00000006526.3   | Mppe1    | 0.255558 | 5.407265 | 2.151032 | 0.048486 | 0.220966 | -4.71236 | 5.326710756 | 5.07153062  | 5.43075556 | 5.488129629 | 5.480515446 | 5.646722694 |
| ENSMUSG00000022214.14  | Dcaf11   | 0.255737 | 5.53068  | 2.246331 | 0.040457 | 0.209437 | -4.55299 | 5.261816706 | 5.352633674 | 5.5864403  | 5.687932131 | 5.611334657 | 5.681719947 |
| ENSMUSG00000003744.13  | Asc3     | 0.255819 | 6.552863 | 2.441033 | 0.02777  | 0.18063  | -4.21698 | 6.387916875 | 6.358784473 | 6.50009948 | 6.622614962 | 6.705650826 | 6.713011919 |
| ENSMUSG00000025337.10  | Sbds     | 0.255856 | 7.722684 | 2.107776 | 0.043296 | 0.213127 | -4.60144 | 7.509230384 | 7.49710083  | 7.77891005 | 7.802383796 | 7.812968518 | 7.935510944 |
| ENSMUSG00000025510.13  | Cd151    | 0.255989 | 5.382192 | 2.155963 | 0.048037 | 0.220331 | -4.7023  | 5.307925399 | 5.034485804 | 5.4107642  | 5.43088264  | 5.558569436 | 5.681033963 |
| ENSMUSG00000031443.7   | F7       | 0.256142 | 5.886836 | 2.251726 | 0.040042 | 0.208688 | -4.5553  | 5.742214769 | 5.605901773 | 5.92315198 | 5.951151628 | 5.983993554 | 6.114600348 |
| ENSMUSG000000034271.15 | Jdp2     | 0.256211 | 5.742166 | 2.225398 | 0.042107 | 0.212176 | -4.59793 | 5.610437064 | 5.448848989 | 5.77693124 | 5.780416676 | 5.869148656 | 5.967213322 |
| ENSMUSG000000002897.5  | Il17ra   | 0.256226 | 7.528789 | 2.135264 | 0.049949 | 0.222753 | -4.73774 | 7.372179045 | 7.226709473 | 7.60435179 | 7.575061711 | 7.656405361 | 7.738023135 |
| ENSMUSG00000026315.13  | Serpinc8 | 0.256559 | 7.100185 | 2.169041 | 0.048663 | 0.218658 | -4.69107 | 6.887836883 | 6.845303658 | 7.18300359 | 7.170102577 | 7.185537418 | 7.32929177  |
| ENSMUSG00000019428.16  | Fkbp8    | 0.256869 | 7.395952 | 2.329111 | 0.03451  | 0.199349 | -4.40147 | 7.271060105 | 7.132852466 | 7.39986159 | 7.498615701 | 7.502597246 | 7.570724186 |
| ENSMUSG000000035356.16 | Nfkib2   | 0.257249 | 6.429345 | 2.135463 | 0.04993  | 0.222753 | -4.7606  | 6.325777274 | 6.088733824 | 6.48509684 | 6.511537166 | 6.487832597 | 6.767909784 |
| ENSMUSG00000024981.5   | Acs5     | 0.257412 | 7.718105 | 2.179403 | 0.045953 | 0.217758 | -4.65615 | 7.576696913 | 7.446317501 | 7.74518466 | 7.746959088 | 7.811025232 | 7.982446303 |
| ENSMUSG00000042079.13  | Hnmp4    | 0.257491 | 6.375368 | 2.400396 | 0.030058 | 0.187691 | -4.2925  | 6.27251419  | 6.224938208 | 6.24118948 | 6.469397245 | 6.377657402 | 6.639512831 |
| ENSMUSG00000005625.15  | Psmf4    | 0.257767 | 6.593033 | 2.383108 | 0.031085 | 0.189975 | -4.32184 | 6.440607882 | 6.342867367 | 6.6084906  | 6.701748508 | 6.710989434 | 6.735046283 |
| ENSMUSG00000026656.15  | Fcgr2b   | 0.257811 | 7.407618 | 2.173706 | 0.046451 | 0.217853 | -4.67488 | 7.253495795 | 7.111281426 | 7.47292506 | 7.511223366 | 7.467003517 | 7.62979125  |
| ENSMUSG00000023952.13  | Gtppb2   | 0.25784  | 7.287403 | 2.271148 | 0.03858  | 0.206554 | -4.50757 | 7.111222865 | 7.025659041 | 7.33985003 | 7.375068698 | 7.415239835 | 7.457341179 |
| ENSMUSG000000030966.12 | Trim21   | 0.258114 | 6.915959 | 2.197532 | 0.043499 | 0.214943 | -4.64509 | 6.740114266 | 6.693044336 | 7.03571618 | 7.019380077 | 7.058942511 | 7.164554238 |
| ENSMUSG00000020178.12  | Adora2a  | 0.258636 | 6.054766 | 2.138816 | 0.049616 | 0.222531 | -4.75442 | 5.916021533 | 5.74422993  | 6.11800392 | 6.073517265 | 6.148157446 | 6.335856365 |
| ENSMUSG00000019189.13  | Rnf145   | 0.25874  | 5.910759 | 2.535904 | 0.023055 | 0.167189 | -4.04096 | 5.850029253 | 5.737619632 | 5.75641865 | 6.073517265 | 6.039488667 | 6.070482544 |
| ENSMUSG000000035778.17 | Ggt1a    | 0.258896 | 7.62159  | 2.247439 | 0.040372 | 0.20925  | -4.54009 | 7.431524777 | 7.387360468 | 7.65817359 | 7.703122896 | 7.682144422 | 7.862114422 |
| ENSMUSG00000063229.14  | Ldha     | 0.259075 | 9.571772 | 2.145429 | 0.049001 | 0.22162  | -4.65936 | 9.488004    | 9.269582941 | 9.57023554 | 9.65130658  | 9.672067391 | 9.779435402 |
| ENSMUSG00000018212.17  | Pmp22    | 0.259114 | 7.069637 | 2.176397 | 0.046215 | 0.217853 | -4.67907 | 6.973773516 | 6.733472762 | 7.11394266 | 7.174072757 | 7.134232619 | 7.288324455 |
| ENSMUSG00000018820.13  | Zfyve27  | 0.259131 | 4.947167 | 2.193445 | 0.044745 | 0.215501 | -4.60081 | 4.642279235 | 4.844534836 | 4.9624869  | 5.039974707 | 5.040152432 | 5.15533741  |
| ENSMUSG00000028452.7   | Vcp      | 0.259164 | 6.087574 | 2.215107 | 0.04294  | 0.212526 | -4.62248 | 5.933284757 | 5.824400278 | 6.11259832 | 6.209706331 | 6.080075523 | 6.365380434 |
| ENSMUSG00000027131.3   | Emc4     | 0.259164 | 5.374267 | 2.21477  | 0.042968 | 0.212526 | -4.5997  | 5.315468919 | 5.082226399 | 5.32947227 | 5.495762954 | 5.381329051 | 5.641342038 |
| ENSMUSG000000034765.6  | Dusp5    | 0.259195 | 5.115202 | 2.222194 | 0.042364 | 0.212176 | -4.5671  | 4.996828752 | 4.794457963 | 5.15239327 | 5.238047956 | 5.235946234 | 5.35943048  |
| ENSMUSG000000035227.6  | Spcs2    | 0.259275 | 5.740021 | 2.301184 | 0.036418 | 0.202683 | -4.46391 | 5.595023509 | 5.476902277 | 5.75421236 | 5.780416676 | 5.857144884 | 5.976517312 |
| ENSMUSG000000005779.12 | Psmb4    | 0.259275 | 7.277697 | 2.348998 | 0.033209 | 0.196054 | -4.36898 | 7.098161787 | 7.063187138 | 7.28282217 | 7.346506444 | 7.371863762 | 7.502320436 |
| ENSMUSG000000037966.15 | Nin1j    | 0.259284 | 8.411072 | 2.147211 | 0.048837 | 0.221249 | -4.69127 | 8.220979486 | 8.138195205 | 8.48665435 | 8.492110359 | 8.504161745 | 8.642332722 |
| ENSMUSG00000026663.6   | Atf6     | 0.259299 | 5.704373 | 2.332319 | 0.034297 | 0.198803 | -4.40712 | 5.547769448 | 5.444796473 | 5.72626476 | 5.821492619 | 5.773396998 | 5.912518702 |
| ENSMUSG000000033940.8  | Bkr1     | 0.25956  | 6.468265 | 2.147217 | 0.048836 | 0.221249 | -4.74009 | 6.270575084 | 6.222573134 | 6.51931796 | 6.503987666 | 6.506204967 | 6.650893276 |
| ENSMUSG00000042165.8   | Gm9774   | 0.259782 | 5.012427 | 2.307723 | 0.035962 | 0.202085 | -4.46657 | 4.822498571 | 4.825959106 | 4.99397944 | 5.101302738 | 5.089275493 | 5.214096566 |
| ENSMUSG00000022749.6   | Tbcd123  | 0.259793 | 5.472329 | 2.294907 | 0.036918 | 0.203223 | -4.46545 | 5.326710756 | 5.230833987 | 5.464870   |             |             |             |

|                       |            |          |          |          |          |          |          |              |             |            |             |              |              |
|-----------------------|------------|----------|----------|----------|----------|----------|----------|--------------|-------------|------------|-------------|--------------|--------------|
| ENSMUSG00000063268.12 | Parp10     | 0.266851 | 7.719059 | 2.270807 | 0.038606 | 0.206554 | -4.49605 | 7.569619852  | 7.423846752 | 7.76471577 | 7.796730193 | 7.8191695    | 7.940273792  |
| ENSMUSG00000039621.3  | Prex1      | 0.266688 | 6.274872 | 2.171224 | 0.04667  | 0.217984 | -6.65391 | 8.167795975  | 7.941556164 | 8.31649151 | 8.363815845 | 8.339743821  | 8.519827265  |
| ENSMUSG0000002204.9   | Sug1       | 0.266941 | 5.637575 | 2.290272 | 0.03719  | 0.203612 | -4.47966 | 5.50525358   | 5.420239368 | 5.58347771 | 5.581956586 | 5.809663373  | 5.924586485  |
| ENSMUSG00000029007.8  | Agtrp      | 0.266955 | 6.625938 | 2.291728 | 0.036703 | 0.202683 | -4.47564 | 4.656407096  | 6.36319572  | 6.68404813 | 6.730069592 | 6.69252074   | 6.85613645   |
| ENSMUSG00000028563.16 | Tm2d1      | 0.267073 | 4.273723 | 2.156333 | 0.048003 | 0.220331 | -5.56482 | 4.275417972  | 4.010009712 | 4.1295347  | 4.386405567 | 4.419582612  | 4.421384965  |
| ENSMUSG00000040990.17 | Sh3kbp1    | 0.267199 | 6.681514 | 2.141554 | 0.049362 | 0.222295 | -4.74711 | 6.56764707   | 6.320924814 | 6.75354647 | 6.736527021 | 6.759357036  | 6.951008546  |
| ENSMUSG00000028382.15 | P1tb3      | 0.267213 | 7.042874 | 2.425573 | 0.02862  | 0.183246 | -4.23624 | 6.936345855  | 6.784070194 | 7.00706191 | 7.132240915 | 7.112941411  | 7.284583873  |
| ENSMUSG00000043895.5  | S1pr2      | 0.267272 | 6.616393 | 2.251291 | 0.040075 | 0.208688 | -5.55696 | 6.442331532  | 6.303127271 | 6.70203707 | 6.72249921  | 6.706814966  | 6.821548628  |
| ENSMUSG00000031103.15 | E1f4       | 0.267381 | 6.309471 | 2.356537 | 0.032728 | 0.194489 | -4.372   | 6.180502457  | 6.00313645  | 6.34099852 | 6.385721014 | 6.43631939   | 6.510149734  |
| ENSMUSG00000032046.15 | Abhd12     | 0.267382 | 7.10171  | 2.300844 | 0.036442 | 0.206833 | -4.45959 | 6.937568478  | 6.806351642 | 7.16152287 | 7.227007344 | 7.178319417  | 7.299488361  |
| ENSMUSG00000021583.6  | Erap1      | 0.267638 | 5.761675 | 2.409161 | 0.02955  | 0.182635 | -4.27013 | 5.64377814   | 5.492691163 | 5.74257974 | 5.94074528  | 5.785431414  | 5.959022817  |
| ENSMUSG00000010755.16 | Cars       | 0.267692 | 5.571243 | 2.156111 | 0.048023 | 0.220331 | -4.7118  | 5.560522636  | 5.197502916 | 5.54678594 | 5.557850635 | 5.766995679  | 5.797798686  |
| ENSMUSG00000023048.13 | Prr13      | 0.267773 | 7.02101  | 2.238818 | 0.041042 | 0.210441 | -4.57126 | 6.851975772  | 6.713400159 | 7.09682115 | 7.128972276 | 7.082977158  | 7.251912323  |
| ENSMUSG00000022867.9  | Usp25      | 0.267898 | 8.252901 | 2.262422 | 0.039231 | 0.208097 | -4.49523 | 8.110410003  | 7.974959955 | 8.27182368 | 8.304567275 | 8.34539407   | 8.510249834  |
| ENSMUSG0000006703.12  | Cd302      | 0.26791  | 5.157286 | 2.146671 | 0.048886 | 0.221375 | -4.70149 | 4.968400344  | 4.874972569 | 5.21720603 | 5.1728829   | 5.254368768  | 5.455886745  |
| ENSMUSG00000045322.10 | Tir9       | 0.268003 | 6.206451 | 2.261596 | 0.039293 | 0.208097 | -4.54127 | 5.883402691  | 6.059878962 | 6.27202444 | 6.311251867 | 6.274252653  | 6.437897274  |
| ENSMUSG00000009291.12 | Pttg1ip    | 0.268142 | 6.683875 | 2.184318 | 0.045527 | 0.216939 | -4.67314 | 6.551766943  | 6.358030968 | 6.73735573 | 6.700648054 | 6.780961858  | 6.974481188  |
| ENSMUSG00000018585.9  | Atox1      | 0.268314 | 5.732007 | 2.221232 | 0.042369 | 0.212176 | -6.03311 | 5.610437064  | 5.403632623 | 5.77293803 | 5.817437255 | 5.7749929    | 6.013144662  |
| ENSMUSG00000053175.16 | Bcl3       | 0.268539 | 6.980017 | 2.252471 | 0.039985 | 0.208688 | -5.54816 | 6.840257066  | 6.654962952 | 7.04232107 | 7.057703237 | 7.075225924  | 7.2096343    |
| ENSMUSG00000005087.17 | Cd44       | 0.268582 | 7.617239 | 2.165104 | 0.047214 | 0.219095 | -4.6838  | 7.394609457  | 7.337959309 | 7.71715328 | 7.659612846 | 7.724473632  | 7.869624401  |
| ENSMUSG00000037447.16 | Arid5a     | 0.268659 | 7.388239 | 2.304125 | 0.036212 | 0.202683 | -4.46628 | 7.219723767  | 7.110002441 | 7.43255246 | 7.445737199 | 7.496806629  | 7.624610155  |
| ENSMUSG00000002768.7  | Mea1       | 0.268741 | 4.695994 | 2.298008 | 0.036641 | 0.202683 | -4.38613 | 4.549369775  | 4.5063661   | 4.62806786 | 4.721956946 | 4.825921445  | 4.94280205   |
| ENSMUSG00000026749.11 | Nek6       | 0.268929 | 7.509985 | 2.321964 | 0.034989 | 0.200218 | -4.41107 | 7.342026626  | 7.245468876 | 7.5404678  | 7.642524778 | 7.543901387  | 7.745525644  |
| ENSMUSG00000027555.8  | Car13      | 0.268968 | 8.06748  | 2.182133 | 0.045716 | 0.212725 | -6.44115 | 7.9318190767 | 7.768346941 | 8.11282246 | 8.113613754 | 8.133769826  | 8.358613715  |
| ENSMUSG00000014361.5  | Mertk      | 0.269    | 7.409762 | 2.303686 | 0.036243 | 0.202683 | -4.46447 | 7.295105579  | 7.118931617 | 7.41157006 | 7.449017544 | 7.505964738  | 7.677982162  |
| ENSMUSG00000020440.13 | Arf5       | 0.269018 | 7.568368 | 2.342207 | 0.033648 | 0.196741 | -4.37317 | 7.364017958  | 7.324788932 | 7.61388505 | 7.664700726 | 7.657703353  | 7.85113761   |
| ENSMUSG00000090841.1  | Myf6       | 0.269159 | 7.059418 | 2.201981 | 0.044026 | 0.214334 | -6.43481 | 6.863600057  | 6.756543191 | 7.15457227 | 7.105050451 | 7.177716283  | 7.290294919  |
| ENSMUSG00000017707.9  | Serinc3    | 0.269318 | 8.464187 | 2.180267 | 0.045878 | 0.21765  | -6.43264 | 8.306743152  | 8.150066734 | 8.53328479 | 8.541194859 | 8.550322655  | 8.703507874  |
| ENSMUSG00000024789.12 | Jak2       | 0.269406 | 8.77096  | 2.165789 | 0.047153 | 0.219041 | -6.44853 | 8.597539445  | 8.48558226  | 8.82628867 | 8.830701477 | 8.835225784  | 9.050449061  |
| ENSMUSG00000035969.15 | Rusc2      | 0.269484 | 6.470389 | 2.252929 | 0.039769 | 0.208663 | -5.55155 | 6.78315921   | 6.164616084 | 6.56196887 | 6.54625776  | 6.582005992  | 6.658166589  |
| ENSMUSG00000040451.14 | Ralb       | 0.269624 | 5.815192 | 2.404072 | 0.028844 | 0.186992 | -4.28074 | 5.742214769  | 5.496611532 | 5.7915627  | 5.915550853 | 5.921962913  | 6.01758335   |
| ENSMUSG00000021457.14 | Syk        | 0.269717 | 8.8117   | 2.169081 | 0.04686  | 0.218658 | -6.46162 | 8.683853014  | 8.493427044 | 8.85417424 | 8.874786819 | 8.888536395  | 9.075424918  |
| ENSMUSG00000066363.12 | Serpina3f  | 0.269773 | 7.642492 | 2.163623 | 0.047346 | 0.219385 | -6.68563 | 7.477640294  | 7.321477465 | 7.72479905 | 7.700372809 | 7.7185909515 | 7.91154738   |
| ENSMUSG00000038462.3  | Uqcrl5     | 0.269793 | 6.231878 | 2.555844 | 0.021166 | 0.164159 | -0.06769 | 6.095425782  | 6.019577597 | 6.17403623 | 6.344041802 | 6.294422698  | 6.463746679  |
| ENSMUSG00000010045.2  | Tmem115    | 0.269921 | 4.989414 | 2.313681 | 0.035552 | 0.21028  | -4.39307 | 4.848730113  | 4.688767146 | 5.01331881 | 5.094615843 | 5.105032746  | 5.186017674  |
| ENSMUSG00000026827.12 | Gpd2       | 0.269949 | 6.171797 | 2.405961 | 0.029734 | 0.186632 | -4.28239 | 5.976749987  | 5.955509182 | 6.19111985 | 6.208158374 | 6.302191075  | 6.429452074  |
| ENSMUSG00000044701.5  | Il27       | 0.270054 | 9.270377 | 2.186323 | 0.043534 | 0.216675 | -4.59799 | 9.105659156  | 8.984587877 | 9.3167834  | 9.349932335 | 9.339271966  | 9.529535259  |
| ENSMUSG00000020707.6  | Rnf135     | 0.270167 | 6.15248  | 2.171689 | 0.046629 | 0.219699 | -6.69835 | 5.993305685  | 5.824400278 | 6.22966103 | 6.231205111 | 6.185837685  | 6.450471665  |
| ENSMUSG00000052310.9  | Sic39a1    | 0.270262 | 7.813595 | 2.282412 | 0.037756 | 0.204879 | -4.47276 | 7.670127772  | 7.525199876 | 7.84084018 | 7.893327534 | 7.876043047  | 8.076033685  |
| ENSMUSG00000031729.5  | Ist1       | 0.270274 | 7.496812 | 2.391798 | 0.030565 | 0.188589 | -4.28579 | 7.371274534  | 7.211285777 | 7.50333508 | 7.567239468 | 7.634155925  | 7.933580934  |
| ENSMUSG00000052837.5  | Junb       | 0.270325 | 8.899725 | 2.20206  | 0.044019 | 0.214334 | -5.58181 | 8.752783872  | 8.601130276 | 8.95837683 | 8.992317267 | 8.977164319  | 9.163363799  |
| ENSMUSG00000018167.10 | Star3      | 0.270361 | 7.644916 | 2.301243 | 0.036414 | 0.202683 | -4.44419 | 7.510052433  | 7.399051433 | 7.68133033 | 7.724936882 | 7.742938411  | 7.871184072  |
| ENSMUSG0000000290.13  | Ilgb2      | 0.270395 | 9.403864 | 2.141184 | 0.049395 | 0.222351 | -6.47176 | 9.262426648  | 9.089869613 | 9.45456108 | 9.4584072   | 9.492872001  | 9.665047923  |
| ENSMUSG00000029780.14 | Nt5c3      | 0.27043  | 7.460614 | 2.245852 | 0.040494 | 0.209437 | -5.54744 | 7.287454543  | 7.206506599 | 7.48197674 | 7.529311668 | 7.497292305  | 7.779146662  |
| ENSMUSG00000043801.6  | Oaz1-ps    | 0.270466 | 7.127659 | 2.230301 | 0.041715 | 0.211874 | -5.58363 | 7.059377327  | 6.806351642 | 7.1124993  | 7.272894362 | 7.105984078  | 7.409197616  |
| ENSMUSG00000062593.15 | Gm49339    | 0.270569 | 8.923753 | 2.155142 | 0.048111 | 0.220397 | -6.6623  | 8.739588662  | 8.6472682   | 8.97868809 | 8.960950625 | 9.000543419  | 9.251547854  |
| ENSMUSG00000029713.9  | Gnb2       | 0.270802 | 8.321622 | 2.290803 | 0.037152 | 0.20357  | -4.44298 | 8.151556317  | 8.048240239 | 8.35981779 | 8.396804095 | 8.417157378  | 8.56156745   |
| ENSMUSG00000020971.13 | Pik3r5     | 0.270841 | 8.172584 | 2.172781 | 0.042763 | 0.212429 | -5.57687 | 8.030162215  | 7.860214379 | 8.22193197 | 8.224903872 | 8.270156292  | 8.428076159  |
| ENSMUSG00000017705.11 | Gpr137b-ps | 0.270936 | 5.193339 | 2.306746 | 0.03603  | 0.20184  | -4.42431 | 5.118248552  | 4.979519345 | 5.07351821 | 5.03939611  | 5.17923644   | 5.50332657   |
| ENSMUSG00000041836.9  | Ptprc      | 0.271006 | 5.290848 | 2.355353 | 0.032803 | 0.194686 | -4.34451 | 5.092135712  | 5.039869001 | 5.32638298 | 5.343336845 | 5.438264124  | 5.506541491  |
| ENSMUSG00000041362.16 | Shtn1      | 0.271458 | 6.080546 | 2.23078  | 0.041677 | 0.21176  | -5.59479 | 5.911051003  | 5.74422993  | 6.17403623 | 6.149684807 | 6.193017965  | 6.311256111  |
| ENSMUSG00000053442.8  | Kcnn4      | 0.271557 | 7.358573 | 2.329797 | 0.034464 | 0.199257 | -4.40125 | 7.219723767  | 7.057890409 | 7.39175654 | 7.449017544 | 7.439090771  | 7.593951706  |
| ENSMUSG00000024401.14 | Tnf        | 0.271567 | 8.549859 | 2.135001 | 0.049974 | 0.222777 | -4.70809 | 8.405032478  | 8.224642786 | 8.61309301 | 8.576417648 | 8.648047558  | 8.8391917654 |
| ENSMUSG00000036966.15 | Spryd3     | 0.271599 | 5.526567 | 2.445101 | 0.02755  | 0.180155 | -4.19553 | 5.345254649  | 5.277152412 | 5.54412904 | 5.514987014 | 5.709738361  | 5.691640286  |
| ENSMUSG00000022365.5  | Der1       | 0.271659 | 5.855445 | 2.20141  | 0.044074 | 0.214361 | -6.46254 | 5.769933106  | 5.500521277 | 5.88166257 | 5.888744866 | 5.93772282   | 6.151408604  |
| ENSMUSG00000043729.9  | Trim56     | 0.27169  | 6.455485 | 2.154533 | 0.048166 | 0.220397 | -4.72746 | 6.274450694  | 6.122107262 | 6.59933968 | 6.507767055 | 6.530027004  | 6.739219329  |
| ENSMUSG00000078763.2  | Sifn1      | 0.271751 | 8.210287 | 2.310074 | 0.0358   | 0.201625 | -4.41199 | 8.030735167  | 7.942993469 | 8.25038711 | 8.279538744 | 8.318561282  | 8.439685326  |
| ENSMUSG00000040774.15 | Cepl1      | 0.271901 | 7.600759 | 2.269081 | 0.038734 | 0.206831 | -4.5025  | 7.421073575  | 7.304805149 | 7.7040767  | 7.717883451 | 7.661591037  | 7.828790684  |
| ENSMUSG00000033552.11 | Map2k4     | 0.271914 | 6.938711 | 2.49886  | 0.024797 | 0.178257 | -4.10415 | 6.776097015  | 6.704953443 | 6.92672617 | 7.017613692 | 7.041810512  | 7.165062946  |
| ENSMUSG00000034361.9  | Cpne2      | 0.27195  | 6.017816 | 2.154468 | 0.048172 | 0.220397 | -4.72684 | 5.813203679  | 5.66979539  | 6.15677487 | 6.138349752 | 6.130667037  | 6.23132438   |
| ENSMUSG00000032667.17 | Pon2       | 0.271976 |          |          |          |          |          |              |             |            |             |              |              |

|                       |          |          |          |          |          |          |          |             |             |             |             |             |             |
|-----------------------|----------|----------|----------|----------|----------|----------|----------|-------------|-------------|-------------|-------------|-------------|-------------|
| ENSMUSG00000022564.6  | Grina    | 0.276319 | 9.009129 | 2.239571 | 0.040983 | 0.210441 | -4.51298 | 8.857315198 | 8.707281224 | 9.049013    | 9.064883772 | 9.107172362 | 9.269109783 |
| ENSMUSG00000018999.16 | Irf1     | 0.276368 | 10.04334 | 2.137512 | 0.049738 | 0.226517 | -6.5828  | 9.665448069 | 9.735236638 | 10.1159009  | 10.10520649 | 10.1386204  | 10.29963316 |
| ENSMUSG00000040007.8  | Bahd1    | 0.276395 | 6.845567 | 2.483598 | 0.255511 | 0.175411 | -4.13418 | 6.866814192 | 6.59226836  | 6.86312888  | 6.969998637 | 6.915104097 | 7.06612659  |
| ENSMUSG00000029152.13 | Ociad1   | 0.276457 | 7.50276  | 2.369215 | 0.031934 | 0.19275  | -4.32643 | 7.130286989 | 7.245468876 | 7.53846683  | 7.591783834 | 7.567115002 | 7.763441253 |
| ENSMUSG00000008036.11 | Apz1s1   | 0.276562 | 7.024911 | 2.4164   | 0.202136 | 0.185133 | -4.25335 | 6.894147895 | 6.718444553 | 7.04795844  | 7.137494374 | 7.109150662 | 7.21820145  |
| ENSMUSG00000027882.18 | Stxpb3   | 0.276738 | 7.440192 | 2.421811 | 0.028831 | 0.184162 | -4.23284 | 7.291285133 | 7.165231962 | 7.44968935  | 7.540426201 | 7.508352269 | 7.686157101 |
| ENSMUSG00000037275.9  | Foir2    | 0.276924 | 8.08307  | 2.244926 | 0.040566 | 0.209514 | -4.53104 | 7.95849725  | 7.766274568 | 8.10878258  | 8.120562428 | 8.165144028 | 8.387709746 |
| ENSMUSG00000033220.6  | Rac2     | 0.276998 | 8.068857 | 2.187629 | 0.045242 | 0.21659  | -6.63157 | 7.914470081 | 7.746289452 | 8.13064199  | 8.091050783 | 8.164535366 | 8.366154916 |
| ENSMUSG00000026773.9  | Pfkfb3   | 0.277065 | 9.054545 | 2.249718 | 0.041096 | 0.208938 | -4.4938  | 8.876247634 | 8.760420583 | 9.11248624  | 9.117988669 | 9.171746763 | 9.28832875  |
| ENSMUSG00000020400.17 | Tnjp1    | 0.277087 | 8.560276 | 2.246915 | 0.040412 | 0.209379 | -5.1346  | 8.353293248 | 8.271157233 | 8.6425784   | 8.661734977 | 8.64521447  | 8.787676201 |
| ENSMUSG00000033917.14 | Gde1     | 0.277133 | 6.568873 | 2.184073 | 0.045548 | 0.216939 | -4.66733 | 5.534902517 | 5.290726676 | 5.769962319 | 5.679962319 | 5.679962319 | 5.951968183 |
| ENSMUSG00000040829.14 | Zmynd15  | 0.277138 | 5.488893 | 2.142278 | 0.049293 | 0.222208 | -4.73132 | 5.33415694  | 5.087434684 | 5.61673279  | 5.560279415 | 5.67596982  | 5.658785415 |
| ENSMUSG00000022684.14 | Bfar     | 0.27737  | 6.940068 | 2.233773 | 0.041439 | 0.211469 | -4.58189 | 6.837639931 | 6.571932837 | 6.9944661   | 7.019380077 | 7.010315222 | 7.206672399 |
| ENSMUSG00000042726.14 | Trafd1   | 0.277463 | 9.142802 | 2.177248 | 0.046141 | 0.217853 | -4.61755 | 8.963757355 | 8.826153841 | 9.22396584  | 9.232633381 | 9.214442141 | 9.395877429 |
| ENSMUSG00000069793.11 | Sifn9    | 0.277547 | 5.97791  | 2.391281 | 0.030595 | 0.188589 | -4.30712 | 5.903562949 | 5.627515586 | 5.98126839  | 6.061565877 | 6.098037077 | 6.195510766 |
| ENSMUSG00000021624.9  | Cd180    | 0.277629 | 7.963379 | 2.29491  | 0.03686  | 0.203131 | -4.4462  | 7.773703068 | 7.696882995 | 8.00343977  | 8.031465781 | 8.018927444 | 8.255857872 |
| ENSMUSG00000078153.3  | Psm2eb   | 0.277655 | 8.859457 | 2.193112 | 0.044774 | 0.215501 | -4.59857 | 8.683124288 | 8.555348611 | 8.9243018   | 8.927946738 | 8.921512676 | 9.144508924 |
| ENSMUSG00000071715.11 | Ncf4     | 0.277722 | 7.25792  | 2.367138 | 0.032063 | 0.19298  | -4.33681 | 7.077236836 | 6.976013402 | 7.30496317  | 7.374378743 | 7.310193038 | 7.504733979 |
| ENSMUSG00000056629.11 | Fkbp2    | 0.277733 | 4.500581 | 2.201616 | 0.040056 | 0.214355 | -4.52534 | 4.252022405 | 4.270298741 | 4.5454581   | 4.682368317 | 4.548340811 | 4.704995415 |
| ENSMUSG00000034640.9  | Tiparp   | 0.277774 | 7.413934 | 2.360939 | 0.03245  | 0.19391  | -4.3438  | 7.316878949 | 7.099729536 | 7.40865184  | 7.470482745 | 7.505964738 | 7.681897695 |
| ENSMUSG00000034116.17 | Vav1     | 0.278187 | 8.785246 | 2.175444 | 0.046299 | 0.217853 | -6.63141 | 8.631554228 | 8.452637913 | 8.85531429  | 8.856344181 | 8.854033899 | 9.062103665 |
| ENSMUSG00000038034.1  | Igfb8    | 0.278222 | 7.935432 | 2.164816 | 0.047239 | 0.219117 | -4.675   | 7.792744334 | 7.56027369  | 8.03831456  | 8.010340405 | 8.05648407  | 8.15447063  |
| ENSMUSG00000028599.10 | Tnfrsf1b | 0.278303 | 10.60267 | 2.148949 | 0.048677 | 0.220972 | -6.62088 | 10.45705987 | 10.2844698  | 10.6500496  | 10.66445381 | 10.70553412 | 10.85446659 |
| ENSMUSG00000078616.1  | Trim30c  | 0.278383 | 7.381048 | 2.431171 | 0.028309 | 0.182324 | -4.21741 | 7.242655823 | 7.085483778 | 7.39839133  | 7.474351427 | 7.479781686 | 7.605622152 |
| ENSMUSG00000030751.7  | Psm1a1   | 0.278481 | 6.041871 | 2.258553 | 0.039522 | 0.208294 | -4.54537 | 5.865528364 | 5.683617723 | 6.15326521  | 6.139974381 | 6.174999508 | 6.23384075  |
| ENSMUSG00000015316.11 | Slamf1   | 0.278509 | 8.163    | 2.270011 | 0.038665 | 0.206683 | -4.48447 | 7.991835198 | 7.869314194 | 8.21114735  | 8.259692718 | 8.201498742 | 8.444512503 |
| ENSMUSG00000021929.8  | Kpna3    | 0.278531 | 7.954257 | 2.382252 | 0.031137 | 0.190179 | -4.28993 | 7.78529378  | 7.674561769 | 7.98641519  | 8.059206604 | 8.030664816 | 8.189397378 |
| ENSMUSG00000034947.13 | Tmem105a | 0.278551 | 8.517586 | 2.264731 | 0.039058 | 0.207653 | -4.48334 | 8.360148004 | 8.208001834 | 8.65770328  | 8.577916678 | 8.615014861 | 8.779333452 |
| ENSMUSG00000024121.13 | Atpv60c  | 0.278599 | 7.160701 | 2.259902 | 0.039421 | 0.208097 | -4.53069 | 7.068334717 | 6.877274404 | 7.20921669  | 7.203116015 | 7.324431175 | 7.371785061 |
| ENSMUSG00000066149.11 | Cdc2c    | 0.278609 | 4.355997 | 2.225238 | 0.042119 | 0.212176 | -4.45995 | 4.241338805 | 4.048483289 | 4.30927265  | 4.497031258 | 4.403164853 | 4.597541912 |
| ENSMUSG00000022534.13 | Mefv     | 0.27873  | 7.027059 | 2.488323 | 0.025315 | 0.174569 | -4.12054 | 6.867545097 | 6.843765603 | 7.08681503  | 7.165324298 | 7.153381284 | 7.315615749 |
| ENSMUSG00000021591.7  | Glrx     | 0.278787 | 6.532268 | 2.248133 | 0.040318 | 0.209217 | -4.56346 | 2.99391522  | 6.224938208 | 6.65232586  | 6.59089319  | 6.667832728 | 6.758274761 |
| ENSMUSG00000071379.1  | Hpcal1   | 0.278809 | 6.813182 | 2.136561 | 0.049827 | 0.222753 | -4.75331 | 6.671230609 | 6.441749597 | 6.90721612  | 6.871734621 | 6.861282456 | 7.125808683 |
| ENSMUSG00000029404.15 | Arlrip4  | 0.278824 | 4.325391 | 2.172866 | 0.046525 | 0.217853 | -4.54476 | 4.220226186 | 3.976715272 | 4.33409382  | 4.527140769 | 4.455853392 | 4.438318121 |
| ENSMUSG00000025357.7  | Dgka     | 0.278885 | 6.037243 | 2.220884 | 0.042373 | 0.212176 | -4.60945 | 5.802507096 | 5.737619632 | 6.14802539  | 6.14807034  | 6.20730844  | 6.31492886  |
| ENSMUSG00000038722.17 | Bud31    | 0.278901 | 5.123592 | 2.271823 | 0.038531 | 0.206554 | -4.48    | 4.953973273 | 4.807141078 | 5.18003853  | 5.144028037 | 5.294978972 | 5.3613987   |
| ENSMUSG00000033467.12 | Crif2    | 0.278943 | 7.373118 | 2.284058 | 0.037637 | 0.204554 | -4.48236 | 7.276867674 | 7.010695241 | 7.41448239  | 7.431877717 | 7.504091465 | 7.600741938 |
| ENSMUSG00000031021.13 | Tmem9b   | 0.279026 | 5.32923  | 2.250243 | 0.040156 | 0.208938 | -4.53387 | 5.242332337 | 4.933986728 | 5.38694551  | 5.500829492 | 5.400066514 | 5.519330077 |
| ENSMUSG00000055413.1  | H2-Q5    | 0.279545 | 5.785781 | 2.155531 | 0.048076 | 0.220331 | -4.72028 | 5.753366091 | 5.356953124 | 5.91930091  | 5.873202956 | 5.846559204 | 6.065302072 |
| ENSMUSG00000020476.14 | Dbnl     | 0.279597 | 8.569375 | 2.280596 | 0.037887 | 0.205058 | -4.45376 | 8.398832091 | 8.267146561 | 8.62414215  | 8.663712089 | 8.640626158 | 8.821790616 |
| ENSMUSG00000029919.5  | Hpgds    | 0.279661 | 5.868895 | 2.477501 | 0.025858 | 0.176099 | -4.1476  | 5.719650164 | 5.587639567 | 5.87533495  | 6.032122992 | 5.903113363 | 6.095512594 |
| ENSMUSG00000040567.15 | Mcoln1   | 0.279839 | 5.514711 | 2.643976 | 0.18618  | 0.152281 | -3.82549 | 4.393282044 | 5.26800693  | 5.49240414  | 5.683482798 | 5.667402722 | 5.6177512   |
| ENSMUSG00000055994.15 | Nod2     | 0.279958 | 4.437307 | 2.201859 | 0.044036 | 0.214334 | -4.5148  | 4.159910525 | 4.288503337 | 4.60409355  | 4.517173924 | 4.483446761 | 4.732713751 |
| ENSMUSG0000004730.14  | Adgre1   | 0.279986 | 9.991221 | 2.184361 | 0.045523 | 0.216939 | -4.59726 | 9.839849873 | 9.676399116 | 10.0383736  | 10.04098278 | 10.08261457 | 10.26035815 |
| ENSMUSG00000021038.16 | Vipas39  | 0.280125 | 7.537642 | 2.25337  | 0.039916 | 0.208688 | -4.53203 | 7.99511187  | 7.201711656 | 7.60179891  | 7.598298478 | 7.617351931 | 7.816538423 |
| ENSMUSG00000035199.6  | Arlrip5  | 0.280146 | 6.305028 | 2.324087 | 0.034846 | 0.200218 | -4.4301  | 6.163883756 | 5.969681153 | 6.35773884  | 6.384350933 | 6.375555114 | 6.5789556   |
| ENSMUSG00000006589.7  | Aprt     | 0.280178 | 8.25317  | 2.396789 | 0.03027  | 0.187973 | -4.29401 | 5.56140505  | 5.460938683 | 5.83242636  | 5.964049371 | 5.916189238 | 6.022157972 |
| ENSMUSG00000058587.7  | Tmod3    | 0.280355 | 7.077965 | 2.222737 | 0.042321 | 0.212176 | -4.59807 | 6.90918263  | 6.731810671 | 7.17274676  | 7.146323184 | 7.195540828 | 7.350921137 |
| ENSMUSG00000042608.15 | Stk40    | 0.280419 | 6.881454 | 2.439469 | 0.027854 | 0.180191 | -4.21435 | 6.77199067  | 6.556992173 | 6.89475664  | 6.984539309 | 6.978009592 | 7.106137566 |
| ENSMUSG00000038866.15 | Zchc2c   | 0.280427 | 6.707487 | 2.457597 | 0.026885 | 0.178511 | -4.18433 | 6.481417534 | 6.475909711 | 6.74315902  | 6.769437007 | 6.816266108 | 6.958729437 |
| ENSMUSG00000050029.7  | Rap2c    | 0.280455 | 7.280895 | 2.266899 | 0.038896 | 0.207284 | -4.51521 | 7.135925059 | 6.918277661 | 7.35053388  | 7.350027602 | 7.394625874 | 7.517538457 |
| ENSMUSG00000055720.9  | Ubl7     | 0.280473 | 8.515183 | 2.4677   | 0.026359 | 0.17712  | -4.16438 | 5.664600904 | 5.531423557 | 5.82368934  | 5.841600193 | 5.990876654 | 6.038907716 |
| ENSMUSG00000057948.12 | Unc13d   | 0.280476 | 5.093356 | 2.272013 | 0.038516 | 0.206554 | -4.47689 | 4.944274446 | 4.735962314 | 5.1628224   | 5.24712153  | 5.16468755  | 5.30526886  |
| ENSMUSG00000031557.15 | Plekha2  | 0.280511 | 6.633204 | 2.342306 | 0.033641 | 0.196741 | -4.39469 | 6.378944862 | 6.368765356 | 6.73306083  | 6.737600455 | 6.727567554 | 6.955983647 |
| ENSMUSG00000016534.15 | Lamp2    | 0.280536 | 9.273399 | 2.219871 | 0.042552 | 0.212347 | -4.53952 | 9.093918765 | 8.973026636 | 9.3332284   | 9.332987292 | 9.360951944 | 9.546281397 |
| ENSMUSG00000026786.14 | Appb1ip  | 0.280625 | 6.172065 | 2.166835 | 0.047059 | 0.220441 | -4.70668 | 6.032738712 | 5.780054898 | 6.27683339  | 6.211252628 | 6.287730636 | 6.443778974 |
| ENSMUSG00000029826.14 | Zhc3hav1 | 0.280657 | 7.790408 | 2.185012 | 0.045467 | 0.216816 | -4.64429 | 7.708592242 | 7.404154488 | 7.83867356  | 7.840351647 | 7.880646365 | 8.064672828 |
| ENSMUSG00000048234.13 | Rnf149   | 0.280923 | 8.817689 | 2.18892  | 0.045131 | 0.216249 | -4.60709 | 8.692931165 | 8.449101894 | 8.89201673  | 8.920610147 | 8.903751474 | 9.047693064 |
| ENSMUSG00000024052.17 | Lpin2    | 0.281092 | 5.916214 | 2.494993 | 0.024986 | 0.17357  | -4.11637 | 5.823821538 | 5.587639567 | 6.01082996  | 6.002064865 | 6.096761424 | 6.076168907 |
| ENSMUSG00000039232.11 | Stx11    | 0.281101 | 7.602576 | 2.302492 | 0.036326 | 0.202683 | -4.44317 | 7.442762123 | 7.285673967 | 7.65987776  | 7.689874467 | 7.6637      |             |

|                      |          |          |          |          |          |          |          |             |             |            |             |             |             |
|----------------------|----------|----------|----------|----------|----------|----------|----------|-------------|-------------|------------|-------------|-------------|-------------|
| ENSMUSG0000040033.15 | Stat2    | 0.285972 | 9.246141 | 2.261249 | 0.039319 | 0.208097 | -4.46775 | 9.040582953 | 8.944967429 | 9.32551293 | 9.337950189 | 9.335761922 | 9.492068276 |
| ENSMUSG0000024014.7  | Pim1     | 0.286067 | 8.179975 | 2.140635 | 0.049446 | 0.222432 | -4.70941 | 8.0432829   | 7.774010922 | 8.29610803 | 8.254826947 | 8.295674012 | 8.415944433 |
| ENSMUSG0000021814.16 | Anx7     | 0.28607  | 8.25539  | 2.253824 | 0.039882 | 0.206868 | -4.51031 | 8.069171628 | 7.920552702 | 8.34920272 | 8.341043335 | 8.345913016 | 8.506441146 |
| ENSMUSG0000034974.12 | Dap3k    | 0.286081 | 5.011476 | 2.21345  | 0.028857 | 0.184162 | -4.20107 | 4.806527614 | 4.762253612 | 5.02860579 | 5.043451082 | 5.129723644 | 5.248796091 |
| ENSMUSG0000031779.3  | Ccl22    | 0.286084 | 4.743028 | 2.173982 | 0.046427 | 0.217853 | -4.60865 | 4.46694575  | 4.46694575  | 4.85081867 | 4.885843031 | 4.788487257 | 5.002676606 |
| ENSMUSG0000026979.16 | Psd4     | 0.286164 | 7.442579 | 2.275865 | 0.038233 | 0.205878 | -4.49494 | 7.273966812 | 7.107441064 | 7.51762605 | 7.482057036 | 7.543901387 | 7.730481407 |
| ENSMUSG0000070003.6  | Ssb4     | 0.286185 | 6.181208 | 2.555556 | 0.221719 | 0.164159 | -4.00698 | 6.073348916 | 5.852204684 | 6.18601597 | 6.321310509 | 6.371603454 | 6.636767013 |
| ENSMUSG0000025198.16 | Erlin1   | 0.28619  | 5.467839 | 2.541384 | 0.022807 | 0.166062 | -4.01496 | 5.399497694 | 5.221389141 | 5.35091399 | 5.472740736 | 5.629012028 | 5.733399932 |
| ENSMUSG0000025792.9  | Stat2a10 | 0.286249 | 4.980655 | 2.176906 | 0.046171 | 0.217853 | -4.632   | 4.87493209  | 4.654085307 | 4.97437317 | 5.025984257 | 5.052030811 | 5.25485247  |
| ENSMUSG0000028779.16 | Pef1     | 0.286353 | 5.477842 | 2.59543  | 0.020499 | 0.158008 | -3.91471 | 5.269604552 | 5.29527127  | 5.43649768 | 5.503536104 | 5.518082455 | 5.642636953 |
| ENSMUSG0000031712.8  | Ii15     | 0.286556 | 7.634591 | 2.366063 | 0.03213  | 0.193081 | -4.32837 | 7.510052433 | 7.312609465 | 7.65201742 | 7.723851967 | 7.684274043 | 7.924736966 |
| ENSMUSG0000037020.16 | Wdr62    | 0.286652 | 5.598639 | 2.154753 | 0.048146 | 0.220397 | -4.71491 | 5.550968329 | 5.178105043 | 5.62681279 | 5.707786046 | 5.602373789 | 5.92578773  |
| ENSMUSG0000096472.1  | Cdkn2d   | 0.286863 | 5.975421 | 2.393933 | 0.030438 | 0.18841  | -4.30213 | 5.813203679 | 5.641746972 | 6.03524324 | 6.035617426 | 6.096761484 | 6.229566009 |
| ENSMUSG0000037049.8  | Smpd1    | 0.286908 | 4.06259  | 2.164021 | 0.047311 | 0.219371 | -4.5086  | 3.956387826 | 3.719283573 | 4.05683947 | 4.224329665 | 4.213759471 | 4.204941801 |
| ENSMUSG0000044786.5  | Zfp36    | 0.286929 | 9.081715 | 2.26307  | 0.039182 | 0.208097 | -4.46947 | 8.93435688  | 8.747318112 | 9.13406922 | 9.138654487 | 9.187261382 | 9.348627696 |
| ENSMUSG0000078920.2  | Ifi47    | 0.287158 | 9.658995 | 2.182981 | 0.045642 | 0.217113 | -4.59193 | 9.47606352  | 9.321339322 | 9.75030842 | 9.720261054 | 9.767847491 | 9.918150325 |
| ENSMUSG0000021451.15 | Sema4d   | 0.287288 | 8.047957 | 2.273401 | 0.038414 | 0.202623 | -4.48185 | 7.895721344 | 7.698585792 | 8.11997674 | 8.109410707 | 8.149234601 | 8.314813647 |
| ENSMUSG0000043257.15 | Pigv     | 0.28731  | 4.141782 | 2.142259 | 0.049295 | 0.222208 | -4.56206 | 3.887204261 | 3.895903227 | 4.19196874 | 4.29603117  | 4.213759471 | 4.365823046 |
| ENSMUSG0000021054.5  | Spp1     | 0.287321 | 7.454374 | 2.402703 | 0.029923 | 0.187287 | -4.26717 | 7.277833333 | 7.168921721 | 7.4854431  | 7.513105143 | 7.531681059 | 7.749262318 |
| ENSMUSG0000025279.7  | Dnase1l3 | 0.287381 | 5.545926 | 2.137585 | 0.049731 | 0.222657 | -4.74204 | 5.475537546 | 5.108081835 | 5.61166625 | 5.562704113 | 5.665683181 | 5.851041133 |
| ENSMUSG0000036067.12 | Sic2a6   | 0.287617 | 9.705335 | 2.27061  | 0.03862  | 0.206554 | -4.43732 | 9.53863367  | 9.393024042 | 9.75419321 | 9.798338584 | 9.778527516 | 9.96290112  |
| ENSMUSG0000035208.15 | Sifn8    | 0.287642 | 8.969276 | 2.087161 | 0.037413 | 0.204415 | -4.43024 | 8.820677509 | 8.643295047 | 9.01295857 | 9.002176524 | 9.102889953 | 9.623658886 |
| ENSMUSG0000046229.9  | Scand1   | 0.287804 | 5.168513 | 2.255979 | 0.039718 | 0.208663 | -5.11545 | 5.139653914 | 4.735962314 | 5.18345724 | 5.231967031 | 5.372922939 | 5.347115408 |
| ENSMUSG0000040456.15 | Akt2     | 0.287863 | 6.930685 | 2.537367 | 0.022989 | 0.167019 | -4.03299 | 6.864885881 | 6.633759099 | 6.86099551 | 7.045619571 | 6.978116988 | 7.300730273 |
| ENSMUSG0000057411.8  | Fam173a  | 0.2879   | 4.474305 | 2.444    | 0.027609 | 0.180155 | -4.0896  | 4.372631088 | 4.251861493 | 4.36453156 | 4.541963109 | 4.632524619 | 4.679582566 |
| ENSMUSG0000032175.10 | Tyk2     | 0.287909 | 6.93876  | 2.573959 | 0.21388  | 0.161176 | -3.96472 | 6.78699047  | 6.663706225 | 6.93384809 | 7.067980716 | 7.000799178 | 7.17923442  |
| ENSMUSG0000030745.9  | Ii12r    | 0.287968 | 4.866553 | 2.300858 | 0.036441 | 0.202683 | -4.40178 | 4.599664891 | 4.632868821 | 4.92212916 | 5.032996725 | 4.889181257 | 5.124279641 |
| ENSMUSG0000020346.16 | Mgat1    | 0.288167 | 7.494326 | 2.406557 | 0.0297   | 0.186632 | -4.25907 | 7.407902196 | 7.130331373 | 7.51423265 | 7.581657527 | 7.648156411 | 7.683673976 |
| ENSMUSG0000046879.6  | Irgn1    | 0.288196 | 9.99713  | 2.168475 | 0.046914 | 0.21874  | -4.60651 | 8.959171274 | 8.639421741 | 10.061666  | 10.0568622  | 10.08832219 | 10.27751463 |
| ENSMUSG0000014226.10 | Cacybp   | 0.288263 | 6.579705 | 2.491843 | 0.025141 | 0.173779 | -4.12314 | 6.433692614 | 6.264562372 | 6.67021839 | 6.702848123 | 6.647087570 | 6.822838635 |
| ENSMUSG0000026672.11 | Optn     | 0.288411 | 8.727558 | 2.380959 | 0.031215 | 0.190335 | -4.31979 | 5.591920938 | 5.348301253 | 5.80161248 | 5.84558295  | 5.897263603 | 5.880661721 |
| ENSMUSG0000028530.14 | Jak1     | 0.288484 | 8.366473 | 2.243076 | 0.04071  | 0.209754 | -4.52593 | 8.283323331 | 7.989638665 | 8.43057578 | 8.454740261 | 8.45493553  | 8.600555512 |
| ENSMUSG000002205.15  | Vrk3     | 0.288502 | 5.061627 | 2.259483 | 0.039452 | 0.208101 | -4.49589 | 4.80116443  | 4.807141078 | 5.13484198 | 5.046919101 | 5.245186907 | 5.334507506 |
| ENSMUSG0000051439.6  | Cd14     | 0.288534 | 8.341677 | 2.353467 | 0.032923 | 0.19504  | -4.33047 | 8.167274958 | 8.018555496 | 8.40810402 | 8.419724078 | 8.475984635 | 8.560416769 |
| ENSMUSG0000051007.14 | Gatd1    | 0.288556 | 4.440912 | 2.302245 | 0.036344 | 0.202683 | -4.33874 | 4.450602575 | 4.155966066 | 4.27763333 | 4.609189016 | 4.448734594 | 4.66527688  |
| ENSMUSG0000036986.16 | Pml      | 0.288683 | 7.969883 | 2.373096 | 0.031695 | 0.191895 | -4.306   | 7.779169122 | 7.669361301 | 8.02931384 | 8.056628444 | 8.053528399 | 8.231292569 |
| ENSMUSG0000032812.16 | Arap1    | 0.28871  | 8.978817 | 2.260392 | 0.039384 | 0.208097 | -4.47727 | 8.928936606 | 8.629078999 | 9.04713768 | 9.066806996 | 9.068978549 | 9.192160385 |
| ENSMUSG0000061731.9  | Ext1     | 0.289161 | 5.580798 | 2.247521 | 0.040365 | 0.20925  | -4.5524  | 5.378044584 | 5.202311904 | 5.71688584 | 5.753076156 | 5.660512225 | 5.779384747 |
| ENSMUSG0000050351.6  | Ier3     | 0.289209 | 6.146935 | 2.442777 | 0.027675 | 0.18028  | -4.21494 | 5.906063288 | 5.885475855 | 6.2113567  | 6.180007334 | 6.304402995 | 6.394305422 |
| ENSMUSG000005354.15  | Txn2     | 0.289245 | 5.385493 | 2.266332 | 0.038938 | 0.207346 | -4.50896 | 5.222234112 | 5.001757859 | 5.48440406 | 5.596228826 | 5.426707047 | 5.581625493 |
| ENSMUSG0000022175.8  | Lrp10    | 0.28925  | 7.822268 | 2.244761 | 0.040579 | 0.203514 | -4.53751 | 7.768162225 | 7.487283201 | 7.92952826 | 7.98927871  | 7.912025091 | 8.147279312 |
| ENSMUSG0000026111.15 | Unc50    | 0.289281 | 5.633789 | 2.611986 | 0.019838 | 0.155892 | -3.89065 | 5.554160134 | 5.335225378 | 5.57308922 | 5.7059359   | 5.770199889 | 5.864655493 |
| ENSMUSG0000009095.7  | Mmp14    | 0.289565 | 9.156793 | 2.242956 | 0.040719 | 0.209754 | -4.5026  | 9.032881716 | 8.799425584 | 9.25043742 | 9.190922367 | 9.287940231 | 9.425050303 |
| ENSMUSG0000067212.8  | H2-T23   | 0.289779 | 10.72556 | 2.206487 | 0.04365  | 0.213852 | -4.51755 | 10.56897899 | 10.39203781 | 10.782613  | 10.81060883 | 10.81396344 | 10.97975957 |
| ENSMUSG0000028955.3  | Vamp3    | 0.289842 | 6.906737 | 2.370129 | 0.031878 | 0.192604 | -4.33971 | 6.697448908 | 6.631977993 | 6.95500531 | 6.983634798 | 6.940213795 | 7.232142463 |
| ENSMUSG0000020638.7  | Cmpk2    | 0.289851 | 10.82467 | 2.216562 | 0.042821 | 0.212429 | -4.49682 | 10.65770878 | 10.5111582  | 10.8714654 | 10.90648185 | 10.90454819 | 11.096763   |
| ENSMUSG0000060036.13 | Rpl3     | 0.290272 | 5.220676 | 2.195723 | 0.044552 | 0.214964 | -4.6214  | 5.07446082  | 5.061203143 | 5.0881836  | 5.523411266 | 5.063846862 | 5.512949919 |
| ENSMUSG0000062082.16 | Cd200r4  | 0.290282 | 6.668599 | 2.454401 | 0.027054 | 0.179098 | -4.19076 | 6.449205613 | 6.394206633 | 6.72567865 | 6.76101616  | 6.739873713 | 6.941610514 |
| ENSMUSG0000018848.4  | Rars     | 0.290287 | 7.114909 | 2.511534 | 0.024187 | 0.170977 | -4.07666 | 6.92282817  | 6.842225907 | 7.14496002 | 7.246746016 | 7.166208571 | 7.36648671  |
| ENSMUSG0000032316.7  | Clk3     | 0.290485 | 5.068191 | 2.36069  | 0.032466 | 0.19391  | -4.31613 | 5.75725714  | 4.844534836 | 5.155878   | 5.166520397 | 5.205498618 | 5.291789377 |
| ENSMUSG0000040843.6  | Chmp2b   | 0.290519 | 5.816132 | 2.156003 | 0.048033 | 0.220331 | -4.72005 | 4.75413435  | 5.348301253 | 5.87955644 | 5.902210117 | 5.89579475  | 6.095512594 |
| ENSMUSG0000078921.3  | Tgtr2    | 0.290579 | 8.587473 | 2.381158 | 0.031203 | 0.190335 | -4.27339 | 8.403706065 | 8.3022876   | 8.62130902 | 8.677482317 | 8.649570765 | 8.870482429 |
| ENSMUSG0000042677.7  | Zc3h12a  | 0.290628 | 6.830655 | 2.251519 | 0.040058 | 0.208688 | -4.55287 | 6.662384214 | 6.441749597 | 6.95200178 | 6.923590807 | 6.938078577 | 7.06612659  |
| ENSMUSG0000033880.11 | Lgals3bp | 0.290634 | 10.68536 | 2.22514  | 0.042127 | 0.212176 | -4.48635 | 10.52197074 | 10.36132687 | 10.7380461 | 10.75906829 | 10.7870298  | 10.94474324 |
| ENSMUSG0000045302.13 | Preb     | 0.290644 | 5.220145 | 2.68377  | 0.017201 | 0.146277 | -3.73201 | 5.042998933 | 5.007264336 | 5.16973352 | 5.300396323 | 5.426707047 | 5.373766936 |
| ENSMUSG0000023206.16 | Ii15ra   | 0.290721 | 7.091265 | 2.407559 | 0.029642 | 0.186632 | -4.2678  | 6.87129787  | 6.795253933 | 7.17188648 | 7.192195319 | 7.175905367 | 7.341050352 |
| ENSMUSG0000048779.4  | P2ry6    | 0.290735 | 7.152756 | 2.459956 | 0.026761 | 0.17813  | -4.17069 | 6.988004902 | 6.829848823 | 7.20506312 | 7.21857949  | 7.318777184 | 7.35167516  |
| ENSMUSG0000035392.7  | Denn1a   | 0.290857 | 7.743734 | 2.594815 | 0.020524 | 0.158008 | -3.90491 | 7.822963699 | 7.469441331 | 7.7440275  | 7.871979942 | 7.850159368 | 7.943835637 |
| ENSMUSG0000071014.10 | Ndufr6   | 0.290899 | 4.094271 | 2.175807 | 0.046267 | 0.217853 | -4.49515 | 3.793082083 | 3.931029655 | 4.11528574 | 4.168113655 | 4.246337384 | 4.331071564 |
| ENSMUSG0000035929.11 | H2-Q4    | 0.290924 | 6.689711 | 2.256791 | 0.039656 | 0.208602 | -4.49223 | 5.555156126 | 5.817881445 | 6.76143124 | 6.756389803 | 6.80839768  | 6.939010193 |
| ENSMUSG0000063889.16 | Crem     | 0.291048 | 5.617719 |          |          |          |          |             |             |            |             |             |             |

|                       |             |          |          |          |          |          |          |             |             |            |             |             |             |
|-----------------------|-------------|----------|----------|----------|----------|----------|----------|-------------|-------------|------------|-------------|-------------|-------------|
| ENSMUSG00000020826.6  | Nos2        | 0.296515 | 12.17331 | 2.166695 | 0.047072 | 0.219041 | -4.53887 | 11.98222181 | 11.85728742 | 12.2372498 | 12.26028739 | 12.26231079 | 12.44049317 |
| ENSMUSG00000020203.17 | Tmc3        | 0.29664  | 6.064903 | 2.309633 | 0.03583  | 0.201681 | -4.54741 | 5.918500391 | 5.662834242 | 6.16195617 | 6.123644481 | 6.196594897 | 6.325888959 |
| ENSMUSG000000102037.1 | Bcl2a1a     | 0.296819 | 5.44308  | 2.58931  | 0.20748  | 0.158889 | -3.92413 | 5.273482767 | 5.207104915 | 5.39875904 | 6.366420458 | 6.286612265 | 6.487550412 |
| ENSMUSG00000036810.16 | Cnep1r1     | 0.296988 | 5.155001 | 2.514773 | 0.202034 | 0.170639 | -4.04253 | 5.052058273 | 4.807141078 | 5.14890002 | 5.259131548 | 5.268032911 | 5.39473925  |
| ENSMUSG00000019578.11 | Ubxn6       | 0.297112 | 5.513819 | 2.642437 | 0.186765 | 0.152281 | -3.82795 | 5.395944256 | 5.197502916 | 5.49544867 | 5.591481704 | 5.708068515 | 5.694462184 |
| ENSMUSG00000056145.5  | Ai5O4432    | 0.297252 | 5.232008 | 2.488668 | 0.40262  | 0.209164 | -4.52894 | 5.14812792  | 4.844534836 | 5.24691934 | 5.204281202 | 5.383422949 | 5.564760614 |
| ENSMUSG00000009072.17 | Mndal       | 0.297258 | 8.898714 | 2.396209 | 0.303004 | 0.188001 | -4.237   | 8.732914386 | 8.582807184 | 8.93549638 | 8.982163757 | 8.983389717 | 9.157515238 |
| ENSMUSG00000039853.18 | Trin14      | 0.297267 | 5.703848 | 2.462826 | 0.262611 | 0.177749 | -4.1697  | 5.502223995 | 5.374102747 | 5.78145026 | 5.867329247 | 5.768598673 | 5.929385475 |
| ENSMUSG00000047722.14 | Cdc45e1     | 0.297457 | 6.830342 | 2.324929 | 0.34789  | 0.200154 | -4.42245 | 6.68002309  | 6.443781562 | 6.60293556 | 6.917927067 | 6.914838016 | 7.152353118 |
| ENSMUSG00000022911.18 | Ifnar2      | 0.297618 | 6.850307 | 2.432166 | 0.282524 | 0.182193 | -4.22825 | 6.731681539 | 6.473925227 | 6.89892177 | 6.965424548 | 6.934512844 | 7.09737947  |
| ENSMUSG00000064120.13 | Mocs1       | 0.297639 | 5.673097 | 2.536135 | 0.230044 | 0.167189 | -4.0337  | 5.531667773 | 5.348301253 | 5.68585715 | 5.82956951  | 5.711406217 | 5.931778997 |
| ENSMUSG00000050957.4  | Insl6       | 0.297738 | 4.71011  | 2.420729 | 0.288891 | 0.184266 | -4.16621 | 4.636267997 | 4.35046909  | 4.68223683 | 4.814388233 | 4.825921445 | 4.951375486 |
| ENSMUSG00000070031.11 | Sp140       | 0.297843 | 7.550546 | 2.37564  | 0.315139 | 0.191501 | -4.31348 | 7.299866953 | 7.243137247 | 7.66369177 | 7.628124205 | 7.700320575 | 7.768136766 |
| ENSMUSG00000002108.10 | Nr1h3       | 0.297868 | 6.230075 | 2.450759 | 0.272747 | 0.179934 | -4.2005  | 6.023556851 | 5.906255773 | 6.31005481 | 6.366420458 | 6.286612265 | 6.487550412 |
| ENSMUSG00000060938.14 | Rpl26       | 0.297876 | 7.089708 | 2.301859 | 0.36371  | 0.202683 | -4.45797 | 6.980906757 | 6.892187811 | 6.94698196 | 7.222413989 | 6.97742405  | 7.518334976 |
| ENSMUSG00000026107.11 | Nabp1       | 0.297895 | 4.994394 | 2.251616 | 0.400051 | 0.208688 | -4.50256 | 4.929602845 | 4.574717068 | 5.01715577 | 5.011857957 | 5.142605053 | 5.290424279 |
| ENSMUSG00000021981.9  | Cab39l      | 0.297988 | 5.238299 | 2.728297 | 0.01574  | 0.139139 | -3.64874 | 5.087737248 | 5.029082446 | 5.14890002 | 5.274004824 | 5.440851229 | 5.449219165 |
| ENSMUSG00000029298.15 | Gbp9        | 0.298196 | 8.712318 | 2.376899 | 0.31462  | 0.191207 | -4.27739 | 8.50861354  | 8.406500546 | 8.77537456 | 8.772975714 | 8.822163546 | 9.088297164 |
| ENSMUSG0000000708.14  | Kat2b       | 0.298331 | 5.329274 | 2.215467 | 0.42911  | 0.212526 | -4.59438 | 5.169097694 | 4.898866885 | 5.45641686 | 5.404090876 | 5.448871392 | 5.598295474 |
| ENSMUSG00000053559.12 | Smagp       | 0.298471 | 4.928162 | 2.391713 | 0.03057  | 0.188589 | -4.24553 | 4.671965366 | 4.647047556 | 5.00174633 | 5.107958782 | 4.980579655 | 5.159712547 |
| ENSMUSG00000040253.15 | Gbp7        | 0.298522 | 7.902042 | 2.317056 | 0.353322 | 0.201006 | -4.40854 | 7.771647946 | 7.517502918 | 7.97067207 | 7.962902463 | 8.013191645 | 8.176335542 |
| ENSMUSG00000052423.14 | B4gal3      | 0.298652 | 4.008368 | 2.301454 | 0.363699 | 0.202683 | -4.25805 | 3.803485414 | 3.810294511 | 3.95650474 | 4.096290474 | 4.218485808 | 4.164808614 |
| ENSMUSG00000029502.14 | Golga3      | 0.298723 | 6.824449 | 2.542738 | 0.222747 | 0.166062 | -4.0251  | 6.635514829 | 6.507337939 | 6.88218862 | 6.898855668 | 7.001480981 | 7.021315358 |
| ENSMUSG00000024677.13 | Msa4e6b     | 0.298742 | 8.202165 | 2.552073 | 0.22332  | 0.164957 | -3.97142 | 8.015763941 | 7.927829868 | 8.21532847 | 8.280595568 | 8.314451818 | 8.549520085 |
| ENSMUSG00000046223.10 | Plaur       | 0.298815 | 7.642022 | 2.404411 | 0.298284 | 0.186992 | -4.25879 | 7.46799562  | 7.294708486 | 7.70768713 | 7.720057413 | 7.742938411 | 7.909941242 |
| ENSMUSG00000025791.18 | Pgm2        | 0.298928 | 6.730964 | 2.559349 | 0.22014  | 0.163601 | -3.99581 | 6.673070773 | 6.370902682 | 6.73619227 | 6.858967325 | 6.833982287 | 6.949471886 |
| ENSMUSG00000073409.12 | H2-Q        | 0.299028 | 6.889261 | 2.437801 | 0.27945  | 0.181144 | -4.16761 | 8.526192643 | 8.359915261 | 8.73488225 | 8.794539898 | 8.793121555 | 8.92619229  |
| ENSMUSG00000026766.11 | Mmadhc      | 0.299112 | 5.336451 | 2.745093 | 0.01522  | 0.136501 | -3.62342 | 5.122555108 | 5.128437658 | 5.30457026 | 5.488129629 | 5.42264025  | 5.552370269 |
| ENSMUSG00000069792.7  | Wfdc17      | 0.299125 | 7.493294 | 2.447271 | 0.27443  | 0.180155 | -4.1849  | 7.328109846 | 7.16646293  | 7.53713131 | 7.552675861 | 7.593583026 | 7.781800646 |
| ENSMUSG00000032504.15 | Pcdc6ip     | 0.299276 | 7.80895  | 2.572531 | 0.021438 | 0.161239 | -3.94465 | 7.297964288 | 7.166158669 | 7.83921552 | 7.930887378 | 7.908394297 | 8.083487644 |
| ENSMUSG00000026177.11 | Sic11a1     | 0.299503 | 7.556923 | 2.475832 | 0.25942  | 0.176177 | -4.13078 | 7.445342973 | 7.206506659 | 7.57080673 | 7.656778874 | 7.634595503 | 7.827505861 |
| ENSMUSG00000053835.17 | H2-T24      | 0.299555 | 7.444145 | 2.485162 | 0.25427  | 0.175276 | -4.11674 | 7.245620266 | 7.145392268 | 7.49235091 | 7.545338547 | 7.5040512   | 7.659161866 |
| ENSMUSG00000032487.8  | Ptg2        | 0.29998  | 10.34803 | 2.321129 | 0.350545 | 0.200218 | -4.32777 | 10.1649933  | 10.03440153 | 10.3954924 | 10.41432205 | 10.45787299 | 10.62106889 |
| ENSMUSG00000029484.12 | Anx3        | 0.300441 | 6.960094 | 2.299109 | 0.365653 | 0.202683 | -4.46585 | 6.797802286 | 6.564481846 | 7.06751755 | 7.037797711 | 7.055060991 | 7.237956819 |
| ENSMUSG00000029533.14 | Necap2      | 0.300547 | 7.479185 | 2.28518  | 0.37556  | 0.204554 | -4.4774  | 7.297964288 | 7.106158669 | 7.58380114 | 7.537963738 | 7.569415951 | 7.779801159 |
| ENSMUSG00000020828.13 | Pld2        | 0.30065  | 5.20005  | 2.232206 | 0.41563  | 0.211556 | -4.55547 | 5.165652441 | 4.742580193 | 5.23378892 | 5.311927624 | 5.252078775 | 5.50332657  |
| ENSMUSG00000039316.14 | Rftn1       | 0.300682 | 7.271963 | 2.50383  | 0.24556  | 0.171946 | -4.08693 | 7.099254738 | 6.933263754 | 7.33370926 | 7.365379177 | 7.407544075 | 7.492625683 |
| ENSMUSG00000049502.16 | Dlx3l       | 0.300733 | 7.796635 | 2.358378 | 0.32612  | 0.194379 | -4.33754 | 7.554558613 | 7.495142642 | 7.88979488 | 7.842348802 | 7.907667041 | 8.090299236 |
| ENSMUSG00000021807.5  | Rtraf       | 0.30078  | 6.257212 | 2.226963 | 0.41981  | 0.212176 | -4.60195 | 6.044134467 | 5.870447746 | 6.40096331 | 6.348264328 | 6.314314634 | 6.59514613  |
| ENSMUSG00000070034.13 | Sp110       | 0.300858 | 7.930458 | 2.463103 | 0.26597  | 0.177749 | -4.14346 | 7.736957767 | 7.613593752 | 7.99129989 | 8.047568427 | 8.007433052 | 8.185892347 |
| ENSMUSG00000038507.6  | Parp2       | 0.300859 | 8.51058  | 2.342959 | 0.33599  | 0.196627 | -4.34437 | 8.58779656  | 8.135054814 | 8.58912743 | 8.62855825  | 8.600237397 | 8.751719845 |
| ENSMUSG00000069892.9  | 993011121Ri | 0.300889 | 5.435153 | 2.365491 | 0.32165  | 0.193208 | -4.33475 | 5.197952557 | 5.216643429 | 5.4336295  | 5.619706888 | 5.362345948 | 5.780639252 |
| ENSMUSG00000027580.17 | Helz2       | 0.300966 | 9.61998  | 2.334767 | 0.34135  | 0.198465 | -4.32595 | 9.454232989 | 9.248965757 | 9.70408381 | 9.708538964 | 9.696694621 | 9.904962863 |
| ENSMUSG00000037344.13 | Sic12a9     | 0.300976 | 6.15435  | 2.559242 | 0.220218 | 0.163601 | -3.99984 | 5.923445366 | 5.849141636 | 6.23625999 | 6.329876789 | 6.307714416 | 6.276595954 |
| ENSMUSG00000025059.16 | Gk          | 0.301063 | 6.99388  | 2.32446  | 0.34821  | 0.200198 | -4.41987 | 6.868736493 | 6.588558188 | 7.0730575  | 7.08151317  | 7.075225924 | 7.276131933 |
| ENSMUSG00000021298.7  | Gpr132      | 0.301129 | 6.101906 | 2.614856 | 0.191725 | 0.155822 | -3.89549 | 5.918500391 | 5.780054898 | 6.15152072 | 6.209706631 | 6.217919043 | 6.279659594 |
| ENSMUSG00000054676.15 | 1600014C10R | 0.301201 | 7.488589 | 2.445604 | 0.275253 | 0.180155 | -4.18808 | 7.279762715 | 7.162766869 | 7.57341499 | 7.61006844  | 7.57400687  | 7.731512149 |
| ENSMUSG00000011008.13 | Mcoln2      | 0.301502 | 7.05898  | 2.297352 | 0.366687 | 0.202683 | -4.46673 | 6.917881076 | 6.64792393  | 7.15978834 | 7.153308445 | 7.144766857 | 7.330240666 |
| ENSMUSG00000029772.17 | Ahcy12      | 0.301544 | 5.353677 | 2.484938 | 0.25483  | 0.175276 | -4.11251 | 5.177400998 | 5.045232186 | 5.37802179 | 5.351773682 | 5.54858332  | 5.61075538  |
| ENSMUSG00000026810.12 | Dpm2        | 0.301738 | 5.152612 | 2.183966 | 0.45557  | 0.216939 | -4.63554 | 4.9080569   | 4.755725669 | 5.3201845  | 5.259131548 | 5.245186907 | 5.425636934 |
| ENSMUSG00000022744.12 | Cldnd1      | 0.301933 | 4.691926 | 2.627429 | 0.01924  | 0.154043 | -3.78238 | 4.503875621 | 4.498567729 | 4.61799665 | 4.75201418  | 4.86840134  | 4.910699797 |
| ENSMUSG00000025509.15 | Pnp1a2      | 0.302024 | 6.628251 | 2.411407 | 0.29241  | 0.185875 | -4.26972 | 6.142745675 | 6.273729647 | 6.74431688 | 6.735452788 | 6.756128626 | 6.847134668 |
| ENSMUSG00000022964.14 | Tmem50b     | 0.302133 | 6.301573 | 2.463539 | 0.26574  | 0.177749 | -4.17706 | 6.194888424 | 5.949801182 | 6.30221406 | 6.295302312 | 6.463296375 | 6.60393466  |
| ENSMUSG00000024725.12 | Ostf1       | 0.302176 | 7.022079 | 2.468814 | 0.26301  | 0.176911 | -4.15753 | 6.776097015 | 6.721797709 | 7.11573316 | 7.125696214 | 7.123626079 | 7.269523798 |
| ENSMUSG00000035673.9  | Sbno2       | 0.302261 | 8.410277 | 2.483934 | 0.255334 | 0.154111 | -4.09131 | 8.25512852  | 8.08190025  | 8.44203861 | 8.533489783 | 8.485275813 | 8.663743599 |
| ENSMUSG00000042901.10 | Aida        | 0.302332 | 7.402136 | 2.586103 | 0.02088  | 0.175111 | -3.93068 | 7.201519172 | 7.168921721 | 7.38137473 | 7.457511697 | 7.470943279 | 7.732542155 |
| ENSMUSG00000026980.15 | Lv75        | 0.302353 | 3.832667 | 2.17317  | 0.464499 | 0.217853 | -4.44373 | 3.946167343 | 3.79763921  | 3.71331534 | 3.940961712 | 3.916912213 | 4.081029198 |
| ENSMUSG00000020709.15 | Adap2       | 0.30252  | 7.152581 | 2.462849 | 0.02661  | 0.177749 | -4.16536 | 6.983276687 | 6.800020551 | 7.22178536 | 7.262491429 | 7.24086721  | 7.47048825  |
| ENSMUSG00000061360.7  | Phf5a       | 0.302734 | 4.709014 | 2.614538 | 0.191738 | 0.155682 | -3.80861 | 4.52354904  | 4.498567729 | 4.64304406 | 4.893568324 | 4.762980382 | 4.932376758 |
| ENSMUSG00000034612.9  | Chst11      | 0.302763 | 5.810569 | 2.388853 | 0.03074  | 0.188787 | -4.30766 | 5.613500112 | 5.43257017  | 5.92315198 | 5.8848744   |             |             |

|                        |           |          |          |          |          |          |          |             |             |             |             |             |             |
|------------------------|-----------|----------|----------|----------|----------|----------|----------|-------------|-------------|-------------|-------------|-------------|-------------|
| ENSMUSG00000038508.7   | Gdf15     | 0.30864  | 4.904706 | 2.481334 | 0.025664 | 0.175618 | -0.07924 | 4.763053288 | 4.552291305 | 4.92212916  | 4.975923471 | 5.026818742 | 5.188021417 |
| ENSMUSG00000055371.17  | Stam2     | 0.308683 | 6.469234 | 2.681946 | 0.017264 | 0.146531 | -3.76874 | 6.268633367 | 6.176883972 | 6.49751016  | 6.610947328 | 6.536628659 | 6.724799125 |
| ENSMUSG00000022876.17  | Samsn1    | 0.309353 | 6.444518 | 2.20309  | 0.043933 | 0.214299 | -6.64296 | 6.219221173 | 6.043893258 | 6.60211827  | 6.472095586 | 6.548807325 | 6.780971177 |
| ENSMUSG000000025647.16 | Shia5a    | 0.30942  | 8.767014 | 2.497895 | 0.028484 | 0.173005 | -0.0552  | 8.586280465 | 8.452637913 | 8.79868964  | 8.844677755 | 8.862690284 | 9.057316107 |
| ENSMUSG00000012129.19  | Bambi-ps1 | 0.309606 | 4.41892  | 2.589113 | 0.020757 | 0.158889 | -8.81238 | 4.175616187 | 4.33409382  | 4.551766352 | 4.526768851 | 4.650816705 | 4.649884324 |
| ENSMUSG00000041153.9   | Osgin2    | 0.309727 | 4.476209 | 2.2983   | 0.03662  | 0.202683 | -3.49999 | 4.259863158 | 4.105517043 | 4.57178538  | 4.627834768 | 4.570560551 | 4.71269024  |
| ENSMUSG00000005881.3   | Ergi3c    | 0.309732 | 6.234106 | 2.596955 | 0.020326 | 0.158008 | -3.92441 | 6.140175892 | 5.858311339 | 6.23461308  | 6.328452608 | 6.343647547 | 6.498894324 |
| ENSMUSG000000028643.10 | Svbp      | 0.310119 | 5.343362 | 2.698679 | 0.016698 | 0.146364 | -3.7118  | 5.14389714  | 5.071753062 | 5.34176367  | 5.459790666 | 5.426707407 | 5.616263885 |
| ENSMUSG00000044715.6   | Gskip     | 0.3103   | 6.650137 | 2.653476 | 0.01827  | 0.150777 | -3.72712 | 6.436289725 | 4.409882576 | 6.42807866  | 4.785615583 | 4.782152692 | 4.858816773 |
| ENSMUSG00000025355.6   | Mmp19     | 0.310363 | 5.375838 | 2.613842 | 0.019072 | 0.153655 | -3.84006 | 5.139653916 | 5.097795196 | 5.41629962  | 5.451963491 | 5.515304153 | 5.634011255 |
| ENSMUSG00000041481.16  | Serpina3g | 0.310541 | 8.859965 | 2.454767 | 0.027034 | 0.179059 | -4.13161 | 8.665154544 | 8.533094587 | 9.01687577  | 8.935684273 | 8.96550557  | 9.143476723 |
| ENSMUSG00000029217.16  | Tec       | 0.310608 | 5.069111 | 2.391308 | 0.030594 | 0.188589 | -4.2602  | 4.914780505 | 4.681897157 | 5.12776125  | 5.222797328 | 5.10249279  | 5.364937686 |
| ENSMUSG00000000736.13  | Tspan31   | 0.311537 | 5.775202 | 2.731049 | 0.015654 | 0.138906 | -3.66979 | 5.690938867 | 5.428471602 | 5.7332795   | 5.95853588  | 5.845040398 | 5.9949472   |
| ENSMUSG000000029925.13 | Tbxas1    | 0.311566 | 5.002752 | 2.28413  | 0.037631 | 0.204554 | -4.4455  | 4.889733087 | 4.567280479 | 5.06612923  | 5.053830228 | 5.105032746 | 5.334507506 |
| ENSMUSG000000032754.14 | Sic8b1    | 0.31157  | 6.774414 | 2.444519 | 0.027581 | 0.180155 | -4.20698 | 6.693112147 | 6.355874473 | 6.80550039  | 6.840118108 | 6.89396267  | 7.057932541 |
| ENSMUSG00000007255.14  | Arfgap2   | 0.311698 | 4.454099 | 2.631716 | 0.019077 | 0.153655 | -3.73846 | 4.259863158 | 4.288503337 | 4.34023296  | 4.632458795 | 4.680234367 | 4.523303281 |
| ENSMUSG000000059288.13 | Cdy1      | 0.311894 | 4.007817 | 2.301213 | 0.036416 | 0.202683 | -4.25735 | 3.738010701 | 3.758993282 | 4.04185029  | 4.116235885 | 4.19480754  | 4.197003982 |
| ENSMUSG000000050490.7  | Gmb394    | 0.3121   | 5.547841 | 2.61787  | 0.019608 | 0.155139 | -3.87548 | 5.403402401 | 5.277152412 | 5.48993694  | 5.679019701 | 5.543667354 | 5.894225621 |
| ENSMUSG000000031488.13 | Rab11fip1 | 0.312296 | 6.490844 | 2.482124 | 0.025624 | 0.175594 | -4.14182 | 6.362653277 | 6.078307799 | 6.56065494  | 6.574166104 | 6.647938695 | 6.721344394 |
| ENSMUSG000000046711.6  | Hmgal1    | 0.312399 | 7.871786 | 2.607893 | 0.019999 | 0.156849 | -3.87677 | 7.16201848  | 7.570538705 | 7.81462353  | 8.014738695 | 7.877900754 | 8.190896932 |
| ENSMUSG000000052776.10 | Oas1a     | 0.312685 | 9.044903 | 2.448814 | 0.027351 | 0.180155 | -4.13702 | 8.873375645 | 8.713189593 | 9.08006731  | 9.145343026 | 9.099550379 | 9.357890797 |
| ENSMUSG000000040843.10 | Tipr1     | 0.312738 | 4.740992 | 2.674597 | 0.017518 | 0.14757  | -3.69978 | 4.497257742 | 4.567280479 | 4.6870619   | 4.81031822  | 4.886230599 | 4.997805721 |
| ENSMUSG000000015396.3  | Cdc83     | 0.313014 | 8.871571 | 2.50261  | 0.024615 | 0.171946 | -4.04345 | 8.697990088 | 8.546393598 | 8.90138913  | 8.939654138 | 8.975950453 | 9.16804798  |
| ENSMUSG000000020143.13 | Dock2c    | 0.313695 | 6.435641 | 2.473144 | 0.026079 | 0.176568 | -4.15875 | 6.223237028 | 6.078307799 | 6.53278232  | 6.605077934 | 6.471193206 | 6.703245206 |
| ENSMUSG000000025737.10 | Wdr24     | 0.31376  | 4.066054 | 2.519718 | 0.023801 | 0.170068 | -3.87615 | 3.907311834 | 3.942634277 | 3.88271448  | 4.212025155 | 4.223142887 | 4.228496529 |
| ENSMUSG000000031266.6  | Gla       | 0.314423 | 8.398201 | 2.560861 | 0.021948 | 0.163601 | -3.94941 | 8.216957333 | 8.081247742 | 8.25117108  | 8.453107514 | 8.526124267 | 8.686006066 |
| ENSMUSG000000031887.13 | Tradd     | 0.314918 | 4.455021 | 2.590277 | 0.020709 | 0.158886 | -3.81555 | 4.195910525 | 4.251861493 | 4.4293165   | 4.686821083 | 4.5960679   | 4.510748145 |
| ENSMUSG000000018819.10 | Lsp1      | 0.31505  | 6.68187  | 2.546169 | 0.022593 | 0.165893 | -4.02103 | 6.486438519 | 6.349385579 | 6.73502786  | 6.736527021 | 6.781755856 | 7.002082911 |
| ENSMUSG000000042334.13 | Tnfrsf14  | 0.315101 | 4.594987 | 2.176401 | 0.046215 | 0.217853 | -4.5818  | 4.422384123 | 4.125908832 | 4.73444531  | 4.655359197 | 4.762980382 | 4.86849333  |
| ENSMUSG000000021905.13 | Dph3      | 0.315152 | 3.669084 | 2.22854  | 0.042311 | 0.212176 | -3.31966 | 3.54348534  | 3.47093661  | 3.60530795  | 3.808270789 | 3.764587842 | 3.911912655 |
| ENSMUSG000000004337.14 | Paf1      | 0.315279 | 5.827206 | 2.918663 | 0.010741 | 0.111042 | -3.31023 | 5.601208706 | 5.655839343 | 5.74951579  | 5.919339943 | 5.924841109 | 6.112491951 |
| ENSMUSG000000104713.4  | Gbp6      | 0.315322 | 7.688317 | 2.658599 | 0.018085 | 0.150179 | -3.78665 | 7.523956064 | 7.379951159 | 7.68856644  | 7.785356082 | 7.765911596 | 7.986481413 |
| ENSMUSG000000039911.13 | Spsb1     | 0.315488 | 5.057981 | 2.518539 | 0.023856 | 0.170191 | -4.0264  | 4.822498571 | 4.749167853 | 5.11707457  | 5.111275324 | 5.200756806 | 5.347115408 |
| ENSMUSG000000045211.4  | Nudt18    | 0.315892 | 4.101741 | 2.163746 | 0.047335 | 0.219385 | -4.51531 | 3.79194439  | 3.79763921  | 4.2518126   | 4.260265794 | 4.26916577  | 4.282006585 |
| ENSMUSG000000055200.13 | Sertad3   | 0.316207 | 4.601943 | 2.219259 | 0.042602 | 0.212361 | -4.50836 | 4.290806865 | 4.233185568 | 4.77579927  | 4.789761126 | 4.693796817 | 4.82830901  |
| ENSMUSG000000025372.16 | Baip2     | 0.316693 | 5.030824 | 2.689139 | 0.017018 | 0.145717 | -3.70468 | 4.843521822 | 4.762253612 | 5.00174633  | 5.222797328 | 5.058614961 | 5.206908912 |
| ENSMUSG000000034774.18 | Tdg       | 0.316803 | 3.819429 | 2.259977 | 0.039415 | 0.208097 | -4.28972 | 3.546167343 | 3.705800343 | 4.14022098  | 3.848572153 | 4.006584258 | 4.068031857 |
| ENSMUSG000000062324.4  | Gpr4a     | 0.316941 | 5.923962 | 2.572955 | 0.02143  | 0.161195 | -3.97129 | 5.688036059 | 5.587639567 | 6.014279    | 6.016287482 | 6.050421432 | 6.135509075 |
| ENSMUSG000000049047.11 | Armxc3    | 0.317148 | 5.39245  | 2.705951 | 0.016458 | 0.14248  | -3.70101 | 5.22234112  | 5.148510261 | 5.32638298  | 5.500829492 | 5.426020545 | 5.786141396 |
| ENSMUSG000000021285.14 | Ppp1r13b  | 0.317214 | 4.379688 | 2.296652 | 0.036737 | 0.202785 | -3.3614  | 4.162838703 | 3.987899111 | 4.48024044  | 4.580760607 | 4.459827761 | 4.606558785 |
| ENSMUSG000000030522.14 | Mtmr10    | 0.317264 | 4.118041 | 2.37611  | 0.03151  | 0.191413 | -4.14636 | 4.022404999 | 3.771990623 | 4.07167451  | 4.17446915  | 4.326881267 | 4.482505253 |
| ENSMUSG000000083902.2  | Gm15975   | 0.317376 | 4.820586 | 2.42331  | 0.028746 | 0.183865 | -4.17486 | 4.030321608 | 4.428433777 | 4.85511241  | 5.004742308 | 4.819749478 | 5.133083750 |
| ENSMUSG000000024608.14 | Rps14     | 0.317803 | 8.210468 | 2.62894  | 0.019182 | 0.153861 | -3.82758 | 8.068001394 | 7.902936263 | 8.24421668  | 8.327205296 | 8.296229803 | 8.483375326 |
| ENSMUSG000000052160.6  | Pld4      | 0.31788  | 6.87032  | 2.295033 | 0.036851 | 0.203131 | -4.47491 | 6.792406506 | 6.38366057  | 6.9580026   | 6.969084961 | 6.96698956  | 7.15177897  |
| ENSMUSG000000041143.16 | Tmc40     | 0.318607 | 4.46501  | 2.527577 | 0.023436 | 0.168536 | -3.93328 | 4.437971654 | 4.13599765  | 4.41775175  | 4.575967596 | 4.563194945 | 4.746375738 |
| ENSMUSG000000016206.6  | H2-M3     | 0.318712 | 6.312631 | 2.534617 | 0.023113 | 0.167352 | -4.05629 | 6.130060785 | 5.929643438 | 6.39655139  | 6.44475164  | 6.391248108 | 6.583529538 |
| ENSMUSG000000033192.4  | Lpcat2    | 0.319884 | 4.567674 | 2.521978 | 0.023696 | 0.169529 | -3.94564 | 4.415380735 | 4.195092397 | 4.58735418  | 4.798017049 | 4.66543208  | 4.746353671 |
| ENSMUSG000000031109.16 | Enox2     | 0.320103 | 4.707608 | 2.776524 | 0.014293 | 0.131275 | -3.50156 | 4.585725435 | 4.418173949 | 4.62806786  | 4.830575724 | 4.856391322 | 4.925137233 |
| ENSMUSG000000075327.9  | Zbtb2     | 0.320128 | 4.293938 | 2.362621 | 0.032345 | 0.193723 | -4.20343 | 4.05532977  | 3.919457955 | 4.37054279  | 4.408141547 | 4.459827761 | 4.510225538 |
| ENSMUSG000000016623.12 | H2-M2     | 0.320294 | 4.991512 | 2.807815 | 0.013424 | 0.126604 | -3.47485 | 4.774045303 | 4.844534836 | 4.87639148  | 5.097963165 | 5.063848662 | 5.292288206 |
| ENSMUSG000000096727.2  | Psmb9     | 0.320595 | 7.942596 | 2.485758 | 0.025443 | 0.175264 | -4.1015  | 7.749542538 | 7.573235624 | 8.0255137   | 8.012523254 | 8.068246568 | 8.226426263 |
| ENSMUSG000000025287.15 | Acot9     | 0.320615 | 5.52524  | 2.598988 | 0.02048  | 0.158008 | -3.91538 | 5.40657842  | 5.182979018 | 5.49819666  | 5.508396901 | 5.507739831 | 5.845548767 |
| ENSMUSG000000026536.9  | Ifi211    | 0.320665 | 8.393874 | 2.571716 | 0.021483 | 0.161318 | -3.92932 | 8.213933342 | 8.059547727 | 8.2841636   | 8.509496246 | 8.458711076 | 8.69331648  |
| ENSMUSG000000052102.14 | Gnpda1    | 0.320834 | 4.579103 | 2.589729 | 0.020731 | 0.158889 | -3.83587 | 4.470478411 | 4.270298741 | 4.50777362  | 4.641662622 | 4.71057253  | 4.873831648 |
| ENSMUSG000000028149.12 | Rap1gds1  | 0.321003 | 6.960644 | 2.564578 | 0.021788 | 0.162831 | -3.98162 | 6.795106919 | 6.594057668 | 7.01091557  | 7.055122387 | 7.055832485 | 7.272831649 |
| ENSMUSG000000021196.13 | Pkrp      | 0.321116 | 8.896376 | 2.445677 | 0.027519 | 0.180155 | -4.14713 | 8.698350762 | 8.525919364 | 8.98506899  | 8.98329546  | 9.018337956 | 9.161728643 |
| ENSMUSG000000024937.14 | Ehbp111   | 0.321366 | 6.939566 | 2.434198 | 0.028142 | 0.181809 | -4.2226  | 6.665390044 | 6.58672036  | 7.08498826  | 7.026424071 | 7.077167166 | 7.196755521 |
| ENSMUSG000000009563.16 | Tor2a     | 0.321554 | 4.310618 | 2.220791 | 0.042478 | 0.212294 | -4.45647 | 4.111764519 | 3.871957531 | 4.42354572  | 4.429599122 | 4.378182496 | 4.487957092 |
| ENSMUSG000000062070.12 | Pgk1      | 0.322096 | 6.468853 | 2.549171 | 0.022781 | 0.166062 | -4.03123 | 6.466248871 | 6.147263872 | 6.30692362  | 6.587325105 | 6.4493716   | 6.859598676 |
| ENSMUSG000000020386.5  | Sar1b     | 0.322323 | 4.972285 | 2.606225 | 0.020065 | 0.15715  | -3.85468 | 4.83521822  | 4           |             |             |             |             |

|                       |             |          |          |          |          |          |          |             |             |              |             |             |             |
|-----------------------|-------------|----------|----------|----------|----------|----------|----------|-------------|-------------|--------------|-------------|-------------|-------------|
| ENSMUSG00000083892.3  | Gm1848      | 0.335431 | 5.255794 | 2.735012 | 0.01553  | 0.138104 | -3.63609 | 4.98268457  | 4.95693266  | 5.31395927   | 5.357370954 | 5.385513812 | 5.538302708 |
| ENSMUSG00000026248.1  | Mrp4a1      | 0.335744 | 4.040699 | 2.491749 | 0.025145 | 0.173779 | -3.92014 | 3.825143293 | 3.719283573 | 4.04936435   | 4.242591871 | 4.156140031 | 4.251672852 |
| ENSMUSG00000040613.14 | Apopb1      | 0.335865 | 7.243589 | 2.724245 | 0.015868 | 0.139769 | -3.67422 | 7.099254738 | 6.86969211  | 7.23571643   | 7.364684572 | 7.316234023 | 7.552953451 |
| ENSMUSG00000039217.12 | Ii18        | 0.336934 | 4.019587 | 2.153419 | 0.048268 | 0.220594 | -4.51453 | 3.803848514 | 3.548519551 | 4.15761724   | 4.236530119 | 4.070360161 | 4.007646315 |
| ENSMUSG00000040788.11 | Eif2b2      | 0.337161 | 5.190195 | 2.663548 | 0.017908 | 0.149529 | -3.76638 | 4.90980569  | 4.868936179 | 5.27282702   | 5.30619612  | 5.306059633 | 5.437454991 |
| ENSMUSG00000062054.6  | Iah1        | 0.337226 | 3.737208 | 2.142929 | 0.049233 | 0.222208 | -4.47148 | 3.520288711 | 3.47093661  | 3.71331514   | 3.824526679 | 3.758147229 | 4.136035965 |
| ENSMUSG000000062054.6 | Pnp1a7      | 0.337544 | 4.157502 | 2.284549 | 0.037601 | 0.204554 | -3.31491 | 4.049798765 | 3.63642664  | 4.23872684   | 4.347561341 | 4.296900875 | 4.376405209 |
| ENSMUSG00000027944.13 | Hax1        | 0.337926 | 5.17776  | 2.464396 | 0.026561 | 0.172689 | -4.13593 | 4.90980569  | 4.850673973 | 5.25344001   | 5.259131548 | 5.214935741 | 5.578573784 |
| ENSMUSG0000002082.12  | Mnt         | 0.338079 | 4.992026 | 2.844868 | 0.012461 | 0.121348 | -3.40291 | 4.864243112 | 4.647047556 | 4.94647902   | 5.114588459 | 5.10249279  | 5.277308799 |
| ENSMUSG00000022350.6  | Wash5       | 0.338102 | 5.327337 | 2.95031  | 0.010077 | 0.10682  | -3.22654 | 5.105251212 | 5.050575507 | 5.31083655   | 5.520919565 | 5.39176828  | 5.584670761 |
| ENSMUSG000000083041.2 | Gmfg-ps     | 0.338216 | 5.368021 | 2.82718  | 0.012912 | 0.123939 | -3.46734 | 5.100892613 | 5.187836581 | 5.30457076   | 5.565124473 | 5.353821876 | 5.538281066 |
| ENSMUSG00000045404.15 | Kcnk13      | 0.338299 | 4.920777 | 2.448213 | 0.027383 | 0.180155 | -4.14044 | 4.869377264 | 4.426417943 | 4.93840798   | 5.025984827 | 5.021450568 | 5.243025303 |
| ENSMUSG00000020225.10 | Tmbim4      | 0.338478 | 6.43394  | 3.044571 | 0.008328 | 0.096751 | -3.06874 | 6.310758843 | 6.139762841 | 6.3592511    | 6.564519966 | 6.523397167 | 6.741949767 |
| ENSMUSG00000042682.8  | Seleno      | 0.339243 | 5.617094 | 2.93535  | 0.010385 | 0.108772 | -3.27068 | 5.49891506  | 5.290762844 | 5.54678594   | 5.763653147 | 5.674260466 | 5.928187224 |
| ENSMUSG00000015750.15 | Aph1a       | 0.339265 | 4.850444 | 2.687818 | 0.017063 | 0.145787 | -3.68772 | 4.80116443  | 4.589476225 | 4.66277353   | 4.964966241 | 4.880312202 | 5.225573134 |
| ENSMUSG000000106990.1 | Gm42547     | 0.340041 | 4.382419 | 2.510617 | 0.024231 | 0.171043 | -3.94975 | 4.429353678 | 3.987899011 | 4.20548355   | 4.618542015 | 4.431774474 | 4.621462792 |
| ENSMUSG00000019866.13 | Crybg1      | 0.340109 | 6.738075 | 2.635279 | 0.018942 | 0.153031 | -3.85328 | 6.6173198   | 6.305364008 | 6.77975729   | 6.823010447 | 6.85827449  | 7.044724484 |
| ENSMUSG00000027678.17 | Ncoa3       | 0.34189  | 6.603799 | 2.706629 | 0.016435 | 0.142472 | -3.70227 | 6.395054527 | 6.208300684 | 6.69367014   | 6.694027644 | 6.81471524  | 7.087720403 |
| ENSMUSG00000036376.2  | Abt1        | 0.341893 | 3.452023 | 2.240864 | 0.040882 | 0.210271 | -4.23549 | 3.216201929 | 3.170763068 | 3.43219326   | 3.625517186 | 3.698850045 | 3.56861091  |
| ENSMUSG00000032596.14 | Uba7        | 0.342021 | 7.979383 | 2.896414 | 0.11234  | 0.113597 | -3.32375 | 7.98811752  | 7.643957999 | 7.98396662   | 8.118091707 | 8.095325093 | 8.236142376 |
| ENSMUSG00000045980.13 | Tmem104     | 0.342314 | 6.17081  | 2.435946 | 0.028047 | 0.181378 | -4.22683 | 6.002681478 | 5.687052713 | 6.30221406   | 6.21899539  | 6.361815058 | 6.452140023 |
| ENSMUSG00000003746.15 | Man1a       | 0.342946 | 5.116249 | 2.625741 | 0.019304 | 0.154133 | -3.83115 | 4.939400472 | 4.702409754 | 5.1766117    | 5.179217465 | 5.279321662 | 5.420533005 |
| ENSMUSG00000025171.1  | Ubd1t       | 0.343555 | 5.682534 | 2.642021 | 0.01869  | 0.152281 | -3.83484 | 5.566857202 | 5.216643429 | 5.73793711   | 5.861431365 | 5.773969989 | 5.938935829 |
| ENSMUSG00000033040.13 | Aph1c       | 0.343621 | 3.804339 | 2.175795 | 0.046268 | 0.217853 | -4.43007 | 3.72639589  | 3.422301835 | 3.74142048   | 3.903167129 | 3.82746032  | 4.204941801 |
| ENSMUSG00000054091.9  | 181003711Ri | 0.344359 | 5.578238 | 2.998245 | 0.009146 | 0.100849 | -3.1464  | 5.385231125 | 5.230833987 | 5.59379192   | 5.738136873 | 5.739468676 | 5.718966483 |
| ENSMUSG00000040483.1  | Xaf1        | 0.343627 | 7.902484 | 2.807551 | 0.13431  | 0.126604 | -4.49715 | 7.695643508 | 7.568677763 | 7.92698113   | 7.994227154 | 8.014205486 | 8.215171539 |
| ENSMUSG00000059040.4  | Eno1b       | 0.345043 | 4.685968 | 2.800066 | 0.013634 | 0.127406 | -4.54248 | 4.450062575 | 4.367695504 | 4.70620242   | 4.793895061 | 4.924122098 | 4.878383168 |
| ENSMUSG00000043091.8  | Tubal1c     | 0.345185 | 5.392908 | 2.592979 | 0.020598 | 0.158344 | -3.913   | 5.307925399 | 4.922375438 | 5.14629962   | 5.548094418 | 4.552865414 | 5.709844181 |
| ENSMUSG00000024410.14 | 3110002716R | 0.345328 | 4.781046 | 2.637114 | 0.018873 | 0.152876 | -3.7738  | 4.648265531 | 4.376232186 | 4.78483026   | 4.838601865 | 4.932726666 | 5.105618149 |
| ENSMUSG00000044424.3  | Gm9493      | 0.346028 | 4.487318 | 2.744848 | 0.015228 | 0.136501 | -3.52913 | 4.133586734 | 4.333034497 | 4.29670007   | 4.747758349 | 4.57616647  | 4.757121295 |
| ENSMUSG00000039745.7  | Httatp2     | 0.346863 | 4.48989  | 2.472177 | 0.026129 | 0.176671 | -4.03736 | 4.450062575 | 4.100009712 | 4.46346473   | 4.686821083 | 4.537098975 | 4.791881952 |
| ENSMUSG00000024084.7  | Qpct        | 0.347151 | 4.974677 | 3.088063 | 0.007625 | 0.092209 | -2.9819  | 4.779510064 | 4.702409754 | 4.91392034   | 5.083154837 | 5.167120427 | 5.203951959 |
| ENSMUSG00000106037.1  | Gm4332      | 0.348204 | 6.70636  | 2.79346  | 0.013816 | 0.128301 | -3.55311 | 6.476379013 | 6.327542693 | 6.79212653   | 6.819973193 | 6.882904647 | 6.939233261 |
| ENSMUSG000000062611.4 | Rps3a2      | 0.348944 | 5.761928 | 2.505131 | 0.024493 | 0.171812 | -4.0928  | 5.616556671 | 5.500521277 | 5.64810197   | 6.06804736  | 5.58610262  | 6.158180211 |
| ENSMUSG000000081895.3 | Rpl17-ps10  | 0.349087 | 6.270473 | 3.092425 | 0.007558 | 0.091718 | -2.97516 | 6.134332276 | 6.073066394 | 6.07811718   | 6.374723762 | 6.318698063 | 6.648389037 |
| ENSMUSG00000071311.1  | Gpr31b      | 0.349607 | 4.223758 | 2.166605 | 0.04708  | 0.219041 | -4.53356 | 4.049798765 | 3.942634277 | 4.14364429   | 4.476603319 | 4.070360161 | 4.659075662 |
| ENSMUSG00000036845.2  | Lin37       | 0.350517 | 3.679138 | 2.43022  | 0.028362 | 0.182324 | -3.95381 | 3.68903098  | 3.405718951 | 3.48855571   | 3.925946997 | 3.738651053 | 3.907005502 |
| ENSMUSG00000068329.12 | Htra2       | 0.350601 | 4.800209 | 2.657509 | 0.018124 | 0.15022  | -3.7378  | 4.884670994 | 4.367695504 | 4.61293455   | 4.912702491 | 4.96943126  | 5.035817998 |
| ENSMUSG00000062345.10 | Serpinb2    | 0.351064 | 6.001692 | 3.069182 | 0.007923 | 0.093916 | -3.019   | 5.71640505  | 5.730978906 | 5.98714895   | 6.122007131 | 6.098037077 | 6.318448839 |
| ENSMUSG00000025521.1  | Tmem192     | 0.351123 | 6.212205 | 2.743242 | 0.015277 | 0.13661  | -3.64052 | 5.388811015 | 5.240217402 | 5.69785767   | 5.712161167 | 5.749244211 | 5.938935829 |
| ENSMUSG00000053040.13 | Gm12399     | 0.351624 | 7.492158 | 2.595771 | 0.021995 | 0.163601 | -3.97727 | 7.328693733 | 7.199308165 | 7.51015796   | 7.597116183 | 7.452616136 | 7.950571547 |
| ENSMUSG00000022210.6  | Dhrs4       | 0.351816 | 3.401702 | 2.142237 | 0.049297 | 0.222208 | -4.3917  | 2.989773994 | 3.265711472 | 3.39728765   | 3.625517186 | 3.67853006  | 3.453990012 |
| ENSMUSG00000030538.13 | Cib1        | 0.35332  | 4.45385  | 2.641493 | 0.01871  | 0.152348 | -3.718   | 4.365381349 | 4.031786655 | 4.41775175   | 4.527140769 | 4.621127749 | 4.70990562  |
| ENSMUSG00000053101.2  | Gpr141      | 0.353386 | 5.053309 | 2.793673 | 0.01381  | 0.128301 | -3.50681 | 4.89477448  | 4.688767146 | 5.03996565   | 5.1728829   | 5.12519035  | 5.410270806 |
| ENSMUSG00000041453.12 | Rpl21       | 0.353878 | 5.822323 | 2.490863 | 0.025189 | 0.173964 | -4.12068 | 5.56252989  | 5.448848989 | 5.89631997   | 6.028618284 | 5.747619157 | 6.229560609 |
| ENSMUSG00000041390.18 | Mdfic       | 0.353981 | 8.005848 | 2.884144 | 0.011515 | 0.115391 | -3.34673 | 7.820843155 | 7.631532373 | 8.03869784   | 8.184540706 | 8.108043148 | 8.253228705 |
| ENSMUSG00000032518.5  | Rpsa        | 0.354789 | 6.936847 | 2.502795 | 0.024606 | 0.171946 | -4.09658 | 6.804518756 | 6.689623599 | 6.78539282   | 7.309448272 | 7.309448272 | 7.309448272 |
| ENSMUSG00000023904.10 | Hcfcr1r1    | 0.355092 | 4.433    | 2.592873 | 0.020603 | 0.158344 | -3.80527 | 4.187713372 | 4.048832889 | 4.47467018   | 4.55663471  | 4.518165927 | 4.775984325 |
| ENSMUSG00000030617.16 | Cp          | 0.3551   | 6.256516 | 2.87456  | 0.011739 | 0.116945 | -3.4002  | 5.945490371 | 5.969681153 | 6.31785318   | 6.358060989 | 6.371313263 | 6.576663182 |
| ENSMUSG00000039041.15 | Adrm1       | 0.355294 | 4.7274   | 2.610623 | 0.018991 | 0.156094 | -3.81597 | 4.350771654 | 4.490726976 | 4.78924464   | 5.00830452  | 4.743549852 | 4.981724559 |
| ENSMUSG00000016498.9  | Pdc1d1g2    | 0.356857 | 4.293731 | 2.581848 | 0.021057 | 0.159689 | -3.80133 | 4.146014081 | 3.835276868 | 3.3409382    | 4.424231199 | 4.546033219 | 4.741856006 |
| ENSMUSG00000072946.12 | Ptgr2       | 0.356941 | 5.353555 | 2.233104 | 0.042288 | 0.212176 | -4.28385 | 3.383437843 | 3.04790632  | 3.58477102   | 3.783582828 | 3.732093327 | 3.669581387 |
| ENSMUSG0000000380.11  | Rabac1      | 0.357203 | 6.293317 | 2.629019 | 0.018802 | 0.15282  | -3.85006 | 6.086635534 | 5.830625509 | 6.42282274   | 6.473385268 | 6.410983946 | 6.535551348 |
| ENSMUSG00000020437.12 | Myo1g       | 0.357687 | 7.179273 | 2.861117 | 0.012061 | 0.119064 | -3.4134  | 6.99036321  | 6.780858852 | 7.23172645   | 7.304866778 | 7.280726566 | 7.451097538 |
| ENSMUSG00000005510.9  | Ndufs3      | 0.359296 | 5.043676 | 2.853409 | 0.012249 | 0.119766 | -3.39106 | 4.833048491 | 4.869701012 | 4.8721607    | 5.303299314 | 4.98053965  | 5.738636706 |
| ENSMUSG00000047798.15 | Cd300f      | 0.359666 | 4.456873 | 2.548663 | 0.022483 | 0.165588 | -3.89071 | 4.23621189  | 4.010009712 | 4.55604673   | 4.541963109 | 4.683636951 | 4.813369699 |
| ENSMUSG00000056144.13 | Trim34a     | 0.359872 | 5.539684 | 2.709289 | 0.016348 | 0.141901 | -3.70137 | 5.592320044 | 5.118295648 | 5.55736487   | 5.723042172 | 5.541793724 | 5.905292287 |
| ENSMUSG00000036918.1  | Ttc7        | 0.360429 | 5.756769 | 2.907844 | 0.010978 | 0.112023 | -3.32845 | 6.362933395 | 5.374102747 | 5.78370447   | 5.823516035 | 5.961892328 | 6.079410919 |
| ENSMUSG00000031320.9  | Rps4x       | 0.360663 | 7.725911 | 2.761863 | 0.014718 | 0.13336  | -3.58954 | 7.560125801 | 7.442257857 | 7.63401454   | 7.921466974 | 7.64669007  | 8.152932412 |
| ENSMUSG000000048100.1 | Taf13       | 0.360778 | 3.353302 | 2.322685 | 0.03494  | 0.200218 | -4.06962 | 3.133265588 | 3.228478566 | 3.16800884</ |             |             |             |

|                           |             |          |          |          |          |          |          |             |             |            |             |             |             |
|---------------------------|-------------|----------|----------|----------|----------|----------|----------|-------------|-------------|------------|-------------|-------------|-------------|
| ENSMUSG00000034875.5      | Nudt19      | 0.430104 | 3.702481 | 2.631792 | 0.019074 | 0.153655 | -3.5858  | 3.558934639 | 3.265711472 | 3.61546782 | 3.977741613 | 3.698850045 | 4.098178821 |
| ENSMUSG000000092558.3     | Med20       | 0.430881 | 3.567416 | 2.791519 | 0.01387  | 0.128445 | -3.25751 | 3.57158994  | 3.150999813 | 3.31239875 | 3.88021592  | 3.758147229 | 3.73134041  |
| ENSMUSG000000028100.11    | Nudt17      | 0.433012 | 3.125659 | 2.226216 | 0.04233  | 0.212176 | -4.18344 | 3.271070838 | 2.685336241 | 3.2744309  | 3.26955989  | 3.758462552 | 3.245913583 |
| ENSMUSG000000032715.9     | TriB3       | 0.433964 | 3.710883 | 2.651074 | 0.018357 | 0.151219 | -5.55164 | 3.30981498  | 3.354795016 | 3.79604007 | 3.848572153 | 3.587898053 | 4.098178821 |
| ENSMUSG000000090877.3     | Hspa1b      | 0.43397  | 4.876198 | 3.660126 | 0.002382 | 0.046186 | -1.77914 | 4.63267997  | 4.596799566 | 4.37909917 | 5.081148347 | 4.966640746 | 5.217743339 |
| ENSMUSG000000071640.3     | Stxbp3-ps   | 0.434126 | 4.699499 | 3.501578 | 0.003288 | 0.056198 | -0.70463 | 4.470478411 | 4.450870987 | 4.51321776 | 4.805557969 | 4.785323451 | 5.099243963 |
| ENSMUSG000000035242.1     | Oaz1        | 0.434468 | 5.503212 | 2.978024 | 0.009528 | 0.103577 | -3.18043 | 5.164928052 | 5.197502916 | 5.14621735 | 5.784577299 | 5.602527448 | 5.978833365 |
| ENSMUSG000000056468.7     | Zfp869      | 0.435346 | 2.806315 | 2.254594 | 0.039823 | 0.208663 | -0.05316 | 2.466631669 | 2.446824154 | 2.86152915 | 2.891640875 | 3.057304016 | 3.13395856  |
| ENSMUSG000000008283.283.3 | Gng5        | 0.436138 | 5.969653 | 3.297512 | 0.004982 | 0.072879 | -2.56573 | 5.799820512 | 5.580269461 | 5.98679945 | 6.195714566 | 5.941990732 | 6.431145837 |
| ENSMUSG000000020038.9     | Cry1        | 0.439993 | 2.712741 | 2.260768 | 0.039355 | 0.208067 | -0.02101 | 2.55265114  | 2.380481659 | 2.55868179 | 2.828562193 | 2.830533154 | 3.125619349 |
| ENSMUSG000000055172.10    | C1ra        | 0.440095 | 5.474573 | 3.467173 | 0.003527 | 0.058645 | -2.21123 | 5.164928052 | 5.050575507 | 5.33452275 | 5.674542754 | 5.674542752 | 5.75653799  |
| ENSMUSG00000042569.13     | Dhrs7b      | 0.443242 | 3.357689 | 2.477557 | 0.025855 | 0.176099 | -3.79028 | 3.116090444 | 3.170763068 | 3.1117014  | 3.791829642 | 3.280445694 | 3.675306375 |
| ENSMUSG000000029330.8     | Cds1        | 0.443622 | 4.124852 | 2.898259 | 0.011192 | 0.113261 | -3.16752 | 3.907311834 | 3.593142542 | 4.17832613 | 4.218190528 | 4.373976385 | 4.478165006 |
| ENSMUSG000000035372.1     | 1810055G02R | 0.448418 | 2.62593  | 2.244199 | 0.040622 | 0.209578 | -4.02849 | 2.332298994 | 2.510249534 | 2.37951295 | 2.891640875 | 2.647503165 | 2.994374816 |
| ENSMUSG000000091498.4     | Mpc1-ps     | 0.451385 | 4.94137  | 3.746303 | 0.001999 | 0.042282 | -1.61276 | 4.671965366 | 4.552291305 | 4.90566456 | 5.198055971 | 5.10249279  | 5.217748328 |
| ENSMUSG000000022335.16    | Zfat        | 0.454903 | 3.130826 | 2.339468 | 0.033826 | 0.197441 | -3.98458 | 2.809201749 | 3.069122806 | 2.89527794 | 3.024226515 | 3.376080974 | 3.611046176 |
| ENSMUSG000000022417.9     | Snrpc       | 0.457664 | 4.819471 | 3.320018 | 0.004759 | 0.070797 | -2.44947 | 4.470478411 | 4.521837508 | 4.7667114  | 5.117885622 | 4.810441736 | 5.229469606 |
| ENSMUSG000000028397.13    | Kdm4c       | 0.459744 | 3.6384   | 2.752688 | 0.014991 | 0.134961 | -3.34555 | 3.657198655 | 3.265711472 | 3.31239875 | 3.697893241 | 4.096123265 | 3.801075368 |
| ENSMUSG000000097534.1     | Gm16675     | 0.4608   | 2.902325 | 2.399692 | 0.030099 | 0.187803 | -8.21255 | 2.390597634 | 2.685336241 | 2.89527794 | 3.316289969 | 3.078137519 | 3.048313623 |
| ENSMUSG000000094242.2     | Gms456      | 0.465198 | 4.152333 | 2.471041 | 0.026187 | 0.176849 | -3.97437 | 4.137527615 | 3.822839764 | 3.80494562 | 4.486853473 | 3.96244829  | 4.699387263 |
| ENSMUSG000000040584.8     | Abcb1a      | 0.465692 | 2.895337 | 2.596971 | 0.022    | 0.163601 | -3.53556 | 2.577876203 | 2.65759125  | 2.75527046 | 3.119533474 | 3.992935197 | 3.268813985 |
| ENSMUSG000000039164.2     | Nai1f       | 0.469028 | 3.03159  | 2.292606 | 0.037024 | 0.203267 | -4.04073 | 2.787668587 | 2.600447343 | 2.0289214  | 2.922175243 | 2.550620989 | 3.505738432 |
| ENSMUSG000000038260.9     | Trpm4       | 0.478861 | 3.700522 | 2.683107 | 0.017224 | 0.146378 | -3.48597 | 3.411866251 | 3.04790632  | 3.86579117 | 3.948371776 | 3.869895586 | 4.059301452 |
| ENSMUSG000000009376.13    | Met         | 0.484744 | 3.562444 | 3.18067  | 0.006318 | 0.08304  | -2.50853 | 3.216201929 | 3.247215128 | 3.48855571 | 3.74135129  | 3.764587842 | 3.916753918 |
| ENSMUSG000000043432.7     | Lenp9       | 0.487599 | 2.47629  | 2.160882 | 0.047592 | 0.219824 | -4.12942 | 2.271544963 | 1.853733772 | 2.51593215 | 2.860446254 | 2.516258632 | 2.83982504  |
| ENSMUSG000000026544.7     | Dusp23      | 0.491932 | 3.0004   | 2.472728 | 0.026101 | 0.176623 | -7.71466 | 2.851327224 | 2.540946331 | 2.87850223 | 3.132648975 | 3.067758373 | 3.531217152 |
| ENSMUSG000000082394.1     | Gm4596      | 0.49255  | 3.801176 | 2.567726 | 0.021653 | 0.162232 | -3.72724 | 3.703929706 | 3.069122806 | 3.85725449 | 4.199641799 | 3.802639148 | 4.228496529 |
| ENSMUSG00000004067.3      | Gm14269     | 0.493038 | 4.019453 | 2.706778 | 0.038615 | 0.206554 | -4.30561 | 3.782234701 | 3.976175272 | 3.59507603 | 4.358768886 | 3.738651053 | 4.665276888 |
| ENSMUSG000000096255.1     | Dynl1b      | 0.494396 | 2.575319 | 2.151687 | 0.048426 | 0.22073  | -4.17116 | 2.390597634 | 2.446824154 | 2.2021167  | 2.745625852 | 2.516258632 | 3.15049017  |
| ENSMUSG000000052151.11    | Plp2p       | 0.496168 | 3.281787 | 2.85611  | 0.012183 | 0.119504 | -3.07188 | 3.691010772 | 2.88995396  | 2.86152915 | 3.437503556 | 3.52766339  | 3.605059881 |
| ENSMUSG000000059883.16    | Irak4       | 0.498934 | 4.394196 | 3.155663 | 0.006647 | 0.085817 | -2.91177 | 4.111764519 | 3.758993282 | 4.51321776 | 4.627834768 | 4.784680502 | 4.606558785 |
| ENSMUSG00000004832.6      | Rbx1-ps     | 0.502804 | 3.9902   | 2.992126 | 0.00926  | 0.101526 | -2.95873 | 3.715379726 | 3.692189912 | 3.80494562 | 4.307642421 | 3.916912213 | 4.405130972 |
| ENSMUSG000000042111.9     | Ccdc115     | 0.512034 | 3.505764 | 2.926543 | 0.010572 | 0.109854 | -2.98354 | 3.232232039 | 2.913605228 | 3.56393752 | 3.643954434 | 3.916912213 | 3.763945075 |
| ENSMUSG000000068457.14    | Uty         | 0.512065 | 3.247395 | 2.219953 | 0.042546 | 0.212347 | -4.21305 | 3.546167343 | 2.446824154 | 2.92825526 | 3.775198967 | 3.225479235 | 3.562445537 |
| ENSMUSG000000083283.3     | Gm15361     | 0.515878 | 3.712826 | 3.531191 | 0.003096 | 0.054188 | -1.85068 | 3.294628576 | 3.422301835 | 3.63557539 | 3.925946697 | 3.97915577  | 4.019364744 |
| ENSMUSG000000021403.2     | Serpinc9b   | 0.518065 | 2.635921 | 2.419043 | 0.028987 | 0.184609 | -3.72576 | 2.473853138 | 2.199909414 | 2.47187697 | 2.779374643 | 2.71565744  | 3.174947061 |
| ENSMUSG000000028716.1     | Pdzk1p1     | 0.520714 | 3.78181  | 3.486254 | 0.003392 | 0.057392 | -1.95196 | 3.467095772 | 3.4549065   | 3.63557539 | 4.034744837 | 3.893595422 | 4.204941801 |
| ENSMUSG000000035399.12    | Oser1       | 0.522102 | 3.839987 | 3.205398 | 0.006009 | 0.08079  | -2.51379 | 3.383437843 | 3.56354776  | 3.77806232 | 4.122823545 | 3.887706662 | 4.304345535 |
| ENSMUSG000000081087.1     | Rps15a-ps7  | 0.523192 | 5.012529 | 3.150752 | 0.006714 | 0.085977 | -2.80228 | 4.630231608 | 4.61854919  | 4.98617052 | 5.398672297 | 4.899181257 | 5.505270269 |
| ENSMUSG000000070524.1     | Fcrlb       | 0.524955 | 2.334491 | 2.418643 | 0.029009 | 0.184665 | -6.65943 | 1.999172692 | 1.993458536 | 2.22883404 | 2.400028851 | 2.741918767 | 2.643562029 |
| ENSMUSG000000066245.1     | Gm10156     | 0.528323 | 3.492974 | 2.956998 | 0.009941 | 0.105823 | -2.92358 | 3.397722069 | 3.13096206  | 3.16800884 | 3.775198962 | 3.489291584 | 3.966662992 |
| ENSMUSG000000095419.1     | Gm14328     | 0.531774 | 4.148586 | 3.2674   | 0.005297 | 0.075533 | -2.4494  | 3.80348514  | 3.692189912 | 4.13660674 | 4.242591871 | 4.325226669 | 4.693752702 |
| ENSMUSG000000062825.15    | Actg1       | 0.53178  | 8.887975 | 4.020068 | 0.001149 | 0.03138  | -1.06918 | 8.676549138 | 8.509037083 | 8.68148145 | 9.236435201 | 8.87762225  | 9.346723074 |
| ENSMUSG00000001642.8      | Akr1b3      | 0.532277 | 3.675513 | 3.501427 | 0.003289 | 0.056118 | -1.90179 | 3.369010772 | 3.37412937  | 3.52134564 | 3.864382668 | 3.845799911 | 4.115126975 |
| ENSMUSG000000019295.8     | Tmem129     | 0.540372 | 3.521481 | 3.170989 | 0.006444 | 0.084193 | -2.51676 | 3.467095772 | 3.004513725 | 3.2871982  | 3.634765262 | 3.738651053 | 3.966662992 |
| ENSMUSG000000027935.14    | Rab13       | 0.544943 | 2.956675 | 2.598763 | 0.020364 | 0.158008 | -3.47629 | 2.851327224 | 2.571003565 | 2.67981823 | 2.828562193 | 3.376080974 | 4.33259057  |
| ENSMUSG000000080668.14    | Rps18       | 0.548848 | 6.161409 | 3.181253 | 0.006311 | 0.08304  | -2.76627 | 5.826463837 | 5.805561773 | 6.02575179 | 6.615625711 | 5.923402079 | 6.471648398 |
| ENSMUSG000000056019.2     | Zfp709      | 0.54894  | 2.426308 | 2.587783 | 0.020811 | 0.158953 | -3.37962 | 2.107425583 | 2.037179913 | 2.30613926 | 2.675662394 | 2.561346521 | 2.87009248  |
| ENSMUSG000000108381.1     | Gm9299      | 0.549137 | 2.111881 | 2.252174 | 0.040008 | 0.208688 | -8.8919  | 1.840910608 | 1.699011178 | 1.90359371 | 2.711068683 | 2.3777205   | 2.718982574 |
| ENSMUSG000000089844.7     | AS30032D15R | 0.549842 | 3.784246 | 3.933746 | 0.001368 | 0.034312 | -1.06882 | 3.45348534  | 3.438696273 | 3.61546782 | 4.109618006 | 4.096123265 | 3.992083004 |
| ENSMUSG000000035274.13    | Tpbp        | 0.554412 | 2.539182 | 2.604013 | 0.021513 | 0.157448 | -3.37415 | 2.30224176  | 2.310940726 | 2.17489523 | 2.981371036 | 2.546637325 | 2.919168471 |
| ENSMUSG000000045868.12    | Gvin1       | 0.554598 | 4.298885 | 3.445974 | 0.003682 | 0.061004 | -2.12108 | 4.212166416 | 3.771990623 | 4.05683947 | 4.756257403 | 4.82691133  | 4.713366876 |
| ENSMUSG000000056054.9     | S100a8      | 0.554991 | 3.428716 | 2.801342 | 0.013599 | 0.127169 | -2.20077 | 3.199991702 | 2.65759125  | 3.52134564 | 3.872223421 | 3.520070246 | 3.801075368 |
| ENSMUSG000000060019.5     | Gm10073     | 0.559954 | 7.099599 | 3.928261 | 0.001383 | 0.034436 | -1.29613 | 6.901684847 | 6.694751667 | 6.86206259 | 7.474995199 | 7.021114393 | 7.642986343 |
| ENSMUSG000000028958.14    | Tmub1       | 0.560759 | 3.480094 | 3.395942 | 0.004077 | 0.064099 | -2.06953 | 3.133265588 | 3.13096206  | 3.32483586 | 3.800073636 | 3.565001005 | 3.926387978 |
| ENSMUSG000000062647.16    | Rpl7a       | 0.568017 | 5.702673 | 3.201594 | 0.006055 | 0.081173 | -2.74659 | 5.307925399 | 5.424361357 | 5.51999417 | 6.100468569 | 5.478557922 | 6.384728051 |
| ENSMUSG000000097567.1     | Gm26637     | 0.571627 | 2.047937 | 2.322084 | 0.034981 | 0.200218 | -3.76224 | 2.141777088 | 1.462943819 | 1.6894684  | 2.164925378 | 2.453862094 | 2.374648997 |
| ENSMUSG000000067038.5     | Rps12-ps3   | 0.575751 | 5.565251 | 3.240647 | 0.005993 | 0.077935 | -2.66339 | 5.554610134 | 5.097795196 | 5.17317671 | 5.993103997 | 5.39176628  | 6.1814995   |
| ENSMUSG000000026497.7     | Mixl1       | 0.578055 | 2.615182 | 2.488264 | 0.025318 | 0.174569 | -3.59746 | 2.446631669 | 2.199909414 | 2.37951295 | 2.620870821 | 2.767797399 | 3.276367379 |
| ENSMUSG000000056071.12    | S100a9      | 0.580403 | 2.813625 | 2.93335  | 0.010427 | 0.1      |          |             |             |            |             |             |             |
