# Supplementary material for: Critical role of the BAF chromatin remodeling complex during murine neural crest development
Source: PubMed Central journal article supplement (PMC8016319; doi:10.1371/journal.pgen.1009446), 2021-03-22
Supplement: pgen.1009446.s012.pdf [file pgen.1009446.s012.pdf]

**Supplemental table 2. Transcription factor enrichment analysis using RNAseq data set**

| TF     | status                    |
|--------|---------------------------|
| SOX2   | common_enrichr_icis_pscan |
| E2F7   | common_enrichr_icis_pscan |
| E2F4   | common_enrichr_icis_pscan |
| TFAP2C | common_enrichr_pscan      |
| CTCF   | common_enrichr_pscan      |
| E2F1   | common_enrichr_pscan      |
| EGR1   | common_enrichr_pscan      |
| MYC    | common_enrichr_pscan      |
| AHR    | common_enrichr_pscan      |
| ARNT   | common_enrichr_pscan      |
| NFYA   | common_enrichr_pscan      |
| ZNF423 | common_enrichr_pscan      |
| NHLH1  | common_enrichr_pscan      |
| INSM1  | common_enrichr_pscan      |
| ZIC1   | common_enrichr_pscan      |
| SP8    | common_enrichr_pscan      |
| GLIS2  | common_enrichr_pscan      |
| HEY1   | common_enrichr_pscan      |
| ZIC4   | common_enrichr_pscan      |
| GLIS1  | common_enrichr_pscan      |
| ZIC3   | common_enrichr_pscan      |
| ASCL1  | common_enrichr_pscan      |
| MYCN   | common_enrichr_pscan      |
| GLIS3  | common_enrichr_pscan      |
| TFAP2B | common_enrichr_pscan      |
| HES5   | common_enrichr_pscan      |
| HIF1A  | common_enrichr_pscan      |
| HEY2   | common_enrichr_pscan      |
| HIC2   | common_enrichr_pscan      |
| E2F8   | common_enrichr_pscan      |
| SP4    | common_enrichr_pscan      |
| TFAP2A | common_enrichr_pscan      |
| ZFX    | common_enrichr_pscan      |
| KLF9   | common_enrichr_pscan      |
| NR2C2  | common_enrichr_pscan      |
| NFKB1  | common_enrichr_pscan      |
| EGR2   | common_enrichr_pscan      |
| KLF5   | common_enrichr_pscan      |
| EGR3   | common_enrichr_pscan      |
| WT1    | common_enrichr_icis       |
| ZFP281 | common_enrichr_icis       |
| SOX9   | common_enrichr_icis       |
| SOX3   | common_enrichr_icis       |
| SRY    | common_enrichr_icis       |
| SOX17  | common_enrichr_icis       |
| PBX1   | common_enrichr_icis       |
| SOX12  | common_enrichr_icis       |
| SOX1   | common_enrichr_icis       |
| PBX3   | common_enrichr_icis       |
| SOX5   | common_enrichr_icis       |
| HMGA2  | common_enrichr_icis       |
| SOX11  | common_enrichr_icis       |
| SOX4   | common_enrichr_icis       |
| SOX21  | common_enrichr_icis       |
| ZFP1   | common_enrichr_icis       |
| ZFP37  | common_enrichr_icis       |
| SOX13  | common_enrichr_icis       |
| NFIB   | common_enrichr_icis       |
| TCF7L1 | common_enrichr_icis       |
| SOX8   | common_enrichr_icis       |
| SOX6   | common_enrichr_icis       |
| HMGB2  | common_enrichr_icis       |
| TCF7L2 | common_enrichr_icis       |
| SOX10  | common_enrichr_icis       |
| BCL6   | common_enrichr_icis       |
| MZF1   | common_icis_pscan         |
| EP300  | uniq_enrichr              |
| SUZ12  | uniq_enrichr              |

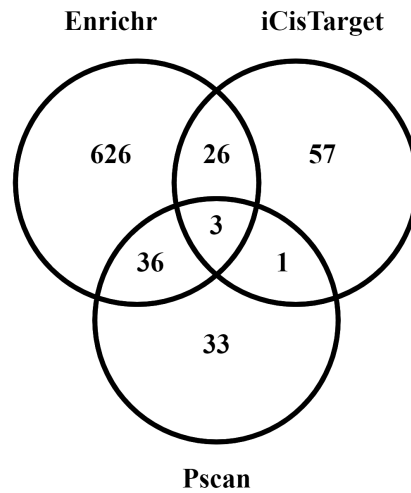

|          |              |
|----------|--------------|
| OLIG2    | uniq_enrichr |
| RNF2     | uniq_enrichr |
| RING1B   | uniq_enrichr |
| MTF2     | uniq_enrichr |
| EZH2     | uniq_enrichr |
| ISL1     | uniq_enrichr |
| DMRT1    | uniq_enrichr |
| YAP1     | uniq_enrichr |
| POU5F1   | uniq_enrichr |
| ZNF217   | uniq_enrichr |
| SMAD3    | uniq_enrichr |
| KDM2B    | uniq_enrichr |
| FOXM1    | uniq_enrichr |
| LMO2     | uniq_enrichr |
| SMAD4    | uniq_enrichr |
| PAX3-FKF | uniq_enrichr |
| FOXA2    | uniq_enrichr |
| JARID2   | uniq_enrichr |
| PHC1     | uniq_enrichr |
| TCF3     | uniq_enrichr |
| SALL4    | uniq_enrichr |
| SA1      | uniq_enrichr |
| TAL1     | uniq_enrichr |
| TP53     | uniq_enrichr |
| CEBPD    | uniq_enrichr |
| EED      | uniq_enrichr |
| KLF4     | uniq_enrichr |
| GF1      | uniq_enrichr |
| POU3F1   | uniq_enrichr |
| P300     | uniq_enrichr |
| AR       | uniq_enrichr |
| STAT3    | uniq_enrichr |
| CBX2     | uniq_enrichr |
| SMARCA4  | uniq_enrichr |
| NANOG    | uniq_enrichr |
| SMARCD1  | uniq_enrichr |
| TCF4     | uniq_enrichr |
| NFE2L2   | uniq_enrichr |
| NRF2     | uniq_enrichr |
| RUNX2    | uniq_enrichr |
| SMC1     | uniq_enrichr |
| GF1B     | uniq_enrichr |
| TEAD4    | uniq_enrichr |
| KDM5B    | uniq_enrichr |
| REST     | uniq_enrichr |
| PRDM14   | uniq_enrichr |
| TCFCP2L  | uniq_enrichr |
| TCF3/E2A | uniq_enrichr |
| MEIS1    | uniq_enrichr |
| SMAD2/3  | uniq_enrichr |
| UBF1/2   | uniq_enrichr |
| Oct-04   | uniq_enrichr |
| BMI1     | uniq_enrichr |
| RCOR2    | uniq_enrichr |
| NR4A2    | uniq_enrichr |
| MITF     | uniq_enrichr |
| TBX20    | uniq_enrichr |
| CEBPB    | uniq_enrichr |
| RCOR3    | uniq_enrichr |
| CTBP1    | uniq_enrichr |
| MNX1     | uniq_enrichr |
| CREB1    | uniq_enrichr |
| BRD4     | uniq_enrichr |
| RUNX1    | uniq_enrichr |
| ESR1     | uniq_enrichr |
| RARB     | uniq_enrichr |
| P53      | uniq_enrichr |
| TOP2B    | uniq_enrichr |
| PBX      | uniq_enrichr |

CTNNB1 uniq\_enrichr  
HNF4A uniq\_enrichr  
NACC1 uniq\_enrichr  
EBF1 uniq\_enrichr  
TP63 uniq\_enrichr  
DROSHA uniq\_enrichr  
BACH1 uniq\_enrichr  
PPARG uniq\_enrichr  
CMYC uniq\_enrichr  
KAP1 uniq\_enrichr  
TET1 uniq\_enrichr  
CCND1 uniq\_enrichr  
IKZF1 uniq\_enrichr  
PPARD uniq\_enrichr  
ZFP57 uniq\_enrichr  
ERA uniq\_enrichr  
NFI uniq\_enrichr  
PIAS1 uniq\_enrichr  
TBX3 uniq\_enrichr  
NUCKS1 uniq\_enrichr  
SMC3 uniq\_enrichr  
ESR2 uniq\_enrichr  
CLOCK uniq\_enrichr  
NR3C1 uniq\_enrichr  
CTBP2 uniq\_enrichr  
VDR uniq\_enrichr  
DPY uniq\_enrichr  
RARG uniq\_enrichr  
FUS uniq\_enrichr  
SETDB1 uniq\_enrichr  
MEF2A uniq\_enrichr  
ASH2L uniq\_enrichr  
CDX2 uniq\_enrichr  
TBL1 uniq\_enrichr  
FOXP2 uniq\_enrichr  
GATA1 uniq\_enrichr  
ZBTB7A uniq\_enrichr  
ZNF532 uniq\_enrichr  
ZNF608 uniq\_enrichr  
POU3F2 uniq\_enrichr  
KIAA1549 uniq\_enrichr  
POU3F3 uniq\_enrichr  
NR2F1 uniq\_enrichr  
PLXNA2 uniq\_enrichr  
NEUROD4 uniq\_enrichr  
EBF3 uniq\_enrichr  
MYT1 uniq\_enrichr  
ZNF704 uniq\_enrichr  
DACH1 uniq\_enrichr  
CHD7 uniq\_enrichr  
SETBP1 uniq\_enrichr  
DZIP1 uniq\_enrichr  
IRX1 uniq\_enrichr  
ZKSCAN2 uniq\_enrichr  
NHLH2 uniq\_enrichr  
MEIS3 uniq\_enrichr  
ZNF462 uniq\_enrichr  
ZNF521 uniq\_enrichr  
NEUROG1 uniq\_enrichr  
ZNF536 uniq\_enrichr  
PLXNA4 uniq\_enrichr  
ZNF618 uniq\_enrichr  
CUX2 uniq\_enrichr  
ONECUT2 uniq\_enrichr  
GLI2 uniq\_enrichr  
FOXG1 uniq\_enrichr  
DPF1 uniq\_enrichr  
DBX1 uniq\_enrichr  
GBX2 uniq\_enrichr

NPAS3 uniq\_enrichr  
SALL1 uniq\_enrichr  
TUB uniq\_enrichr  
FGD1 uniq\_enrichr  
LHX9 uniq\_enrichr  
POU3F4 uniq\_enrichr  
ZNF827 uniq\_enrichr  
NFATC4 uniq\_enrichr  
PATZ1 uniq\_enrichr  
SMARCA1 uniq\_enrichr  
POU4F1 uniq\_enrichr  
SLC26A1C uniq\_enrichr  
LHX5 uniq\_enrichr  
ZFHX4 uniq\_enrichr  
ZSCAN18 uniq\_enrichr  
ZNF362 uniq\_enrichr  
MEIS2 uniq\_enrichr  
MYT1L uniq\_enrichr  
SCRT2 uniq\_enrichr  
SALL2 uniq\_enrichr  
TBR1 uniq\_enrichr  
ZC3H13 uniq\_enrichr  
ZBTB46 uniq\_enrichr  
EN2 uniq\_enrichr  
ZNF821 uniq\_enrichr  
POU2F1 uniq\_enrichr  
ST18 uniq\_enrichr  
SCRT1 uniq\_enrichr  
KLF7 uniq\_enrichr  
ZFHX2 uniq\_enrichr  
EBF4 uniq\_enrichr  
PKNOX2 uniq\_enrichr  
ID4 uniq\_enrichr  
TWIST1 uniq\_enrichr  
LHX1 uniq\_enrichr  
ZNF300 uniq\_enrichr  
OTP uniq\_enrichr  
SORBS2 uniq\_enrichr  
TEAD2 uniq\_enrichr  
TBX5 uniq\_enrichr  
TBX18 uniq\_enrichr  
ZNF248 uniq\_enrichr  
TOX3 uniq\_enrichr  
PBRM1 uniq\_enrichr  
SNAI2 uniq\_enrichr  
HOXB8 uniq\_enrichr  
BARHL1 uniq\_enrichr  
PAX3 uniq\_enrichr  
ZNF804A uniq\_enrichr  
NEUROG1 uniq\_enrichr  
RFX3 uniq\_enrichr  
TCF12 uniq\_enrichr  
BARHL2 uniq\_enrichr  
ZNF25 uniq\_enrichr  
ZNF91 uniq\_enrichr  
NR2F2 uniq\_enrichr  
TEAD1 uniq\_enrichr  
MKX uniq\_enrichr  
ZNF219 uniq\_enrichr  
ZFP90 uniq\_enrichr  
SALL3 uniq\_enrichr  
CAMTA1 uniq\_enrichr  
ZNF84 uniq\_enrichr  
OTX1 uniq\_enrichr  
UNCX uniq\_enrichr  
MEOX2 uniq\_enrichr  
PRRX1 uniq\_enrichr  
NFIA uniq\_enrichr  
LCORL uniq\_enrichr

ZNF436 uniq\_enrichr  
ZNF74 uniq\_enrichr  
AHDC1 uniq\_enrichr  
FBN1 uniq\_enrichr  
ALX4 uniq\_enrichr  
ZEB1 uniq\_enrichr  
PRRX2 uniq\_enrichr  
FOXF1 uniq\_enrichr  
ZNF711 uniq\_enrichr  
ZMAT3 uniq\_enrichr  
TERF2IP uniq\_enrichr  
HSF2 uniq\_enrichr  
GLI3 uniq\_enrichr  
HAND2 uniq\_enrichr  
TEAD3 uniq\_enrichr  
PHOX2B uniq\_enrichr  
TSHZ3 uniq\_enrichr  
PHOX2A uniq\_enrichr  
EN1 uniq\_enrichr  
OSR2 uniq\_enrichr  
FEZF1 uniq\_enrichr  
POGZ uniq\_enrichr  
DACH2 uniq\_enrichr  
CREB3L1 uniq\_enrichr  
RORB uniq\_enrichr  
ZNF606 uniq\_enrichr  
ZSCAN23 uniq\_enrichr  
HES3 uniq\_enrichr  
POU4F2 uniq\_enrichr  
ZNF48 uniq\_enrichr  
ZNF197 uniq\_enrichr  
BNC2 uniq\_enrichr  
FOXL1 uniq\_enrichr  
LHX2 uniq\_enrichr  
HAND1 uniq\_enrichr  
TCF21 uniq\_enrichr  
IRX2 uniq\_enrichr  
ZKSCAN1 uniq\_enrichr  
VEZF1 uniq\_enrichr  
DMRTA2 uniq\_enrichr  
ZNF627 uniq\_enrichr  
ZMAT4 uniq\_enrichr  
ATOX8 uniq\_enrichr  
FAM171B uniq\_enrichr  
PLXNB1 uniq\_enrichr  
ETV1 uniq\_enrichr  
HOXD8 uniq\_enrichr  
OSR1 uniq\_enrichr  
PLXNA1 uniq\_enrichr  
PLXNA3 uniq\_enrichr  
CSDC2 uniq\_enrichr  
ATF2 uniq\_enrichr  
NKX6-2 uniq\_enrichr  
RBPJ uniq\_enrichr  
ZNF260 uniq\_enrichr  
ZSCAN10 uniq\_enrichr  
OLIG3 uniq\_enrichr  
FMNL2 uniq\_enrichr  
TOX uniq\_enrichr  
ARX uniq\_enrichr  
ZNF254 uniq\_enrichr  
FOXC2 uniq\_enrichr  
ZNF334 uniq\_enrichr  
PAWR uniq\_enrichr  
THAP2 uniq\_enrichr  
WDHD1 uniq\_enrichr  
LARP6 uniq\_enrichr  
SATB2 uniq\_enrichr  
SMAD9 uniq\_enrichr

ZFHX3 uniq\_enrichr  
ADNP2 uniq\_enrichr  
ZIC5 uniq\_enrichr  
ZNF117 uniq\_enrichr  
ZNF404 uniq\_enrichr  
ZNF678 uniq\_enrichr  
ZNF428 uniq\_enrichr  
CARHSP1 uniq\_enrichr  
TRIM3 uniq\_enrichr  
SMARCA5 uniq\_enrichr  
MKRN3 uniq\_enrichr  
KNTC1 uniq\_enrichr  
SLC39A1C uniq\_enrichr  
ZIC2 uniq\_enrichr  
ZNF10 uniq\_enrichr  
ARNT2 uniq\_enrichr  
ZNF496 uniq\_enrichr  
SMARCC2 uniq\_enrichr  
GATAD2B uniq\_enrichr  
SMARCC1 uniq\_enrichr  
NFIX uniq\_enrichr  
HOXC8 uniq\_enrichr  
TSC22D1 uniq\_enrichr  
DLX2 uniq\_enrichr  
TBX2 uniq\_enrichr  
ZNF644 uniq\_enrichr  
DLX1 uniq\_enrichr  
FOXH1 uniq\_enrichr  
ZNF629 uniq\_enrichr  
ZSCAN29 uniq\_enrichr  
IRX5 uniq\_enrichr  
SMARCE1 uniq\_enrichr  
HOXB5 uniq\_enrichr  
EOMES uniq\_enrichr  
NEUROD4 uniq\_enrichr  
ZHX3 uniq\_enrichr  
POU6F1 uniq\_enrichr  
EMX1 uniq\_enrichr  
ZNF540 uniq\_enrichr  
ZNF518B uniq\_enrichr  
MTA3 uniq\_enrichr  
ADAMTS1 uniq\_enrichr  
TLX2 uniq\_enrichr  
KLF12 uniq\_enrichr  
THRA uniq\_enrichr  
ZSCAN1 uniq\_enrichr  
ZNF589 uniq\_enrichr  
ZNF292 uniq\_enrichr  
YEATS2 uniq\_enrichr  
DEPDC1 uniq\_enrichr  
HMGB3 uniq\_enrichr  
TRIM23 uniq\_enrichr  
RAPGEF5 uniq\_enrichr  
LIN28B uniq\_enrichr  
PLXNB3 uniq\_enrichr  
DLX5 uniq\_enrichr  
ID3 uniq\_enrichr  
ADNP uniq\_enrichr  
FOXF2 uniq\_enrichr  
HDX uniq\_enrichr  
ZNF649 uniq\_enrichr  
TGIF2 uniq\_enrichr  
DEK uniq\_enrichr  
ZDHHC11 uniq\_enrichr  
TLX3 uniq\_enrichr  
ETV5 uniq\_enrichr  
CREB3L2 uniq\_enrichr  
ZNF398 uniq\_enrichr  
ZNF195 uniq\_enrichr

FOXN4 uniq\_enrichr  
LHX8 uniq\_enrichr  
INSM2 uniq\_enrichr  
ZBTB41 uniq\_enrichr  
ZNF354C uniq\_enrichr  
ZFP28 uniq\_enrichr  
ZNF781 uniq\_enrichr  
SSH1 uniq\_enrichr  
LGR4 uniq\_enrichr  
OLIG1 uniq\_enrichr  
LCOR uniq\_enrichr  
ZNF449 uniq\_enrichr  
ZNF253 uniq\_enrichr  
DEPDC1B uniq\_enrichr  
RGS11 uniq\_enrichr  
ZNF738 uniq\_enrichr  
RGS7 uniq\_enrichr  
HOXA11 uniq\_enrichr  
DLX6 uniq\_enrichr  
PAX7 uniq\_enrichr  
DMRT3 uniq\_enrichr  
MSX2 uniq\_enrichr  
VAX1 uniq\_enrichr  
SIX5 uniq\_enrichr  
ZNF92 uniq\_enrichr  
ZNF177 uniq\_enrichr  
ZNF33A uniq\_enrichr  
ZNF418 uniq\_enrichr  
ZNF251 uniq\_enrichr  
ZBTB12 uniq\_enrichr  
AFF3 uniq\_enrichr  
NPAS4 uniq\_enrichr  
AFF4 uniq\_enrichr  
SMAD6 uniq\_enrichr  
CUL4B uniq\_enrichr  
E2F2 uniq\_enrichr  
SMAD5 uniq\_enrichr  
HOXD3 uniq\_enrichr  
E2F5 uniq\_enrichr  
LMX1A uniq\_enrichr  
OTX2 uniq\_enrichr  
ZNF146 uniq\_enrichr  
HOXD4 uniq\_enrichr  
DEAF1 uniq\_enrichr  
ZBED4 uniq\_enrichr  
FOXP4 uniq\_enrichr  
ZNF714 uniq\_enrichr  
ZNF488 uniq\_enrichr  
ZNF483 uniq\_enrichr  
ZNF664 uniq\_enrichr  
LHX6 uniq\_enrichr  
WHSC1 uniq\_enrichr  
PAX8 uniq\_enrichr  
LMX1B uniq\_enrichr  
ZNF697 uniq\_enrichr  
ZNF503 uniq\_enrichr  
ZFP42 uniq\_enrichr  
ZNF358 uniq\_enrichr  
ZBTB10 uniq\_enrichr  
THAP10 uniq\_enrichr  
ZCCHC11 uniq\_enrichr  
ZNF770 uniq\_enrichr  
PDS5B uniq\_enrichr  
HIST1H1E uniq\_enrichr  
EPAS1 uniq\_enrichr  
NR2C1 uniq\_enrichr  
HOXD9 uniq\_enrichr  
NKX2-1 uniq\_enrichr  
NR6A1 uniq\_enrichr

ZNF281 uniq\_enrichr  
HEYL uniq\_enrichr  
TEF uniq\_enrichr  
SHOX2 uniq\_enrichr  
ZNF160 uniq\_enrichr  
ESRRG uniq\_enrichr  
HOXC6 uniq\_enrichr  
PRDM12 uniq\_enrichr  
ZNF365 uniq\_enrichr  
ZNF385B uniq\_enrichr  
ZNF680 uniq\_enrichr  
ZNF607 uniq\_enrichr  
ZNF367 uniq\_enrichr  
BAZ2B uniq\_enrichr  
SLC4A10 uniq\_enrichr  
HOXB3 uniq\_enrichr  
BCL6B uniq\_enrichr  
ZFPM2 uniq\_enrichr  
NPAS2 uniq\_enrichr  
ZNF708 uniq\_enrichr  
FOXD3 uniq\_enrichr  
ZNF207 uniq\_enrichr  
BCL11A uniq\_enrichr  
ZNF287 uniq\_enrichr  
ZNF385D uniq\_enrichr  
PRDM8 uniq\_enrichr  
ZSCAN12 uniq\_enrichr  
ZNF226 uniq\_enrichr  
ZNF454 uniq\_enrichr  
ZNF286A uniq\_enrichr  
ZNF69 uniq\_enrichr  
TERF1 uniq\_enrichr  
RAPGEF4 uniq\_enrichr  
ZC3H7B uniq\_enrichr  
ARID2 uniq\_enrichr  
NFE2L3 uniq\_enrichr  
HOXD10 uniq\_enrichr  
NKX6-1 uniq\_enrichr  
ZBTB4 uniq\_enrichr  
ZNF551 uniq\_enrichr  
ZBTB39 uniq\_enrichr  
FOXS1 uniq\_enrichr  
ZFP82 uniq\_enrichr  
ZNF138 uniq\_enrichr  
FEZF2 uniq\_enrichr  
CASP8AP1 uniq\_enrichr  
FBXO41 uniq\_enrichr  
POU2F2 uniq\_enrichr  
SIX4 uniq\_enrichr  
HOXA13 uniq\_enrichr  
IRX4 uniq\_enrichr  
RAX uniq\_enrichr  
ZNF12 uniq\_enrichr  
ZHX1 uniq\_enrichr  
SOHLH1 uniq\_enrichr  
ZNF35 uniq\_enrichr  
HIC1 uniq\_enrichr  
IRX3 uniq\_enrichr  
ZNF43 uniq\_enrichr  
HLF uniq\_enrichr  
CUX1 uniq\_enrichr  
ZNF415 uniq\_enrichr  
DMRTA1 uniq\_enrichr  
TSHZ1 uniq\_enrichr  
DBX2 uniq\_enrichr  
HES4 uniq\_enrichr  
ZNF460 uniq\_enrichr  
ZNF579 uniq\_enrichr  
ARID5B uniq\_enrichr



TOX2 uniq\_enrichr  
NFXL1 uniq\_enrichr  
ZNF638 uniq\_enrichr  
RBM26 uniq\_enrichr  
CHD9 uniq\_enrichr  
HIST1H1C uniq\_enrichr  
CEBPZ uniq\_enrichr  
RBPJL uniq\_enrichr  
NFIC uniq\_enrichr  
ZEB2 uniq\_enrichr  
ZNF280C uniq\_enrichr  
ZNF93 uniq\_enrichr  
ZNF302 uniq\_enrichr  
RLF uniq\_enrichr  
IKZF4 uniq\_enrichr  
PRDM16 uniq\_enrichr  
ZNF443 uniq\_enrichr  
ZNF107 uniq\_enrichr  
ZKSCAN5 uniq\_enrichr  
ZNF433 uniq\_enrichr  
FOXD4L6 uniq\_enrichr  
NOC3L uniq\_enrichr  
ZNF720 uniq\_enrichr  
RAD51 uniq\_enrichr  
HP1BP3 uniq\_enrichr  
ATMIN uniq\_enrichr  
HIST1H1E uniq\_enrichr  
PRMT3 uniq\_enrichr  
ZNF391 uniq\_enrichr  
FOXK1 uniq\_enrichr  
ZNF775 uniq\_enrichr  
ZNF772 uniq\_enrichr  
PLEKHA4 uniq\_enrichr  
HIST1H1C uniq\_enrichr  
HES6 uniq\_enrichr  
SF3A3 uniq\_enrichr  
GATA6 uniq\_enrichr  
PGR uniq\_enrichr  
NRL uniq\_enrichr  
ATF6 uniq\_enrichr  
FOXO1 uniq\_enrichr  
FLI1 uniq\_enrichr  
NEUROG1 uniq\_enrichr  
TRPS1 uniq\_enrichr  
EMX2 uniq\_enrichr  
ETV2 uniq\_enrichr  
ESRRB uniq\_enrichr  
ZBTB20 uniq\_enrichr  
BCL11B uniq\_enrichr  
ZNF750 uniq\_enrichr  
ZBTB48 uniq\_enrichr  
PITX2 uniq\_enrichr  
PAX6 uniq\_enrichr  
ARID3A uniq\_enrichr  
PLAGL2 uniq\_enrichr  
MYOD1 uniq\_enrichr  
RORC uniq\_enrichr  
LIN28A uniq\_enrichr  
PIN1 uniq\_enrichr  
NKX25 uniq\_enrichr  
MSGN1 uniq\_enrichr  
ADAR uniq\_enrichr  
CEBPG uniq\_enrichr  
ONECUT1 uniq\_enrichr  
FOXQ1 uniq\_enrichr  
GATA4 uniq\_enrichr  
KMT2A uniq\_enrichr  
ATF3 uniq\_enrichr  
PAX2 uniq\_enrichr

|         |              |
|---------|--------------|
| IRX6    | uniq_enrichr |
| OVOL1   | uniq_enrichr |
| NEUROD1 | uniq_enrichr |
| XBP1    | uniq_enrichr |
| ATF4    | uniq_enrichr |
| LIN28   | uniq_enrichr |
| GRHL2   | uniq_enrichr |
| JUND    | uniq_enrichr |
| RELA    | uniq_enrichr |
| MYRF    | uniq_enrichr |
| STAT1   | uniq_enrichr |
| RBM10   | uniq_enrichr |
| ZNF143  | uniq_enrichr |
| YBX1    | uniq_enrichr |
| GATA2   | uniq_enrichr |
| IRF6    | uniq_enrichr |
| BACH2   | uniq_enrichr |
| SRF     | uniq_enrichr |
| ZNF142  | uniq_enrichr |
| EP400   | uniq_enrichr |
| RARA    | uniq_enrichr |
| DNMT1   | uniq_enrichr |
| OVOL2   | uniq_enrichr |
| NCOA3   | uniq_enrichr |
| MECP2   | uniq_enrichr |
| HSF1    | uniq_enrichr |
| STAT6   | uniq_enrichr |
| EHF     | uniq_enrichr |
| PCGF2   | uniq_enrichr |
| DDIT3   | uniq_enrichr |
| U2AF1   | uniq_enrichr |
| ADARB1  | uniq_enrichr |
| GATA3   | uniq_enrichr |
| SPDEF   | uniq_enrichr |
| GTF2I   | uniq_enrichr |
| NR2E3   | uniq_enrichr |
| HOXC13  | uniq_enrichr |
| YY1     | uniq_enrichr |
| JUN     | uniq_enrichr |
| HOXB4   | uniq_enrichr |
| ESRRA   | uniq_enrichr |
| FOSL1   | uniq_enrichr |
| TWIST2  | uniq_enrichr |
| AIRE    | uniq_enrichr |
| JUNB    | uniq_enrichr |
| ZNF581  | uniq_enrichr |
| IRF1    | uniq_enrichr |
| MEF2D   | uniq_enrichr |
| FOXP3   | uniq_enrichr |
| ZXDC    | uniq_enrichr |
| CEBPA   | uniq_enrichr |
| BPTF    | uniq_enrichr |
| GLI1    | uniq_enrichr |
| ELF3    | uniq_enrichr |
| AFF1    | uniq_enrichr |
| DUX4    | uniq_enrichr |
| FOXA1   | uniq_enrichr |
| FOXO3   | uniq_enrichr |
| RC3H1   | uniq_enrichr |
| MYB     | uniq_enrichr |
| DOT1L   | uniq_enrichr |
| ATF6B   | uniq_enrichr |
| CHD1    | uniq_enrichr |
| ETS1    | uniq_enrichr |
| PHF20   | uniq_enrichr |
| NR5A2   | uniq_enrichr |
| TOX4    | uniq_enrichr |
| PCGF6   | uniq_enrichr |
| FOXP1   | uniq_enrichr |

HNF4G uniq\_enrichr  
SATB1 uniq\_enrichr  
NR113 uniq\_enrichr  
2610008E uniq\_icis  
A430033K uniq\_icis  
DOF1.8 uniq\_icis  
DOF3 uniq\_icis  
FANK1 uniq\_icis  
GM2004 uniq\_icis  
HBP1 uniq\_icis  
HMGA1 uniq\_icis  
HMGA1-R uniq\_icis  
IRF2 uniq\_icis  
IRF7 uniq\_icis  
LEF1 uniq\_icis  
M0647 uniq\_icis  
M0659 uniq\_icis  
M1611 uniq\_icis  
MAFK uniq\_icis  
NRSF uniq\_icis  
OAF1 uniq\_icis  
ORC2 uniq\_icis  
PBX2 uniq\_icis  
PBX4 uniq\_icis  
POLR2A uniq\_icis  
RBAK uniq\_icis  
RBBP9 uniq\_icis  
ROX1 uniq\_icis  
SIP4 uniq\_icis  
SOX14 uniq\_icis  
SOX15 uniq\_icis  
SOX18 uniq\_icis  
SOX30 uniq\_icis  
SOX7 uniq\_icis  
SREBF1 uniq\_icis  
SSRP1 uniq\_icis  
SUT1 uniq\_icis  
TAF1 uniq\_icis  
TCF7 uniq\_icis  
TPI1 uniq\_icis  
UBTF uniq\_icis  
URC2 uniq\_icis  
ZBTB14 uniq\_icis  
ZFP12 uniq\_icis  
ZFP157 uniq\_icis  
ZFP182 uniq\_icis  
ZFP248 uniq\_icis  
ZFP300 uniq\_icis  
ZFP316 uniq\_icis  
ZFP334 uniq\_icis  
ZFP382 uniq\_icis  
ZFP39 uniq\_icis  
ZFP599 uniq\_icis  
ZFP663 uniq\_icis  
ZFP68 uniq\_icis  
ZFP780B uniq\_icis  
ZFP810 uniq\_icis  
ZFP9 uniq\_icis  
ZFP949 uniq\_icis  
ZFP976 uniq\_icis  
TFDP1 uniq\_pscan  
SP2 uniq\_pscan  
HINFP uniq\_pscan  
SP1 uniq\_pscan  
TCFL5 uniq\_pscan  
E2F6 uniq\_pscan  
EGR4 uniq\_pscan  
ZBTB33 uniq\_pscan  
NRF1 uniq\_pscan

|          |            |
|----------|------------|
| ZNF740   | uniq_pscan |
| ZNF263   | uniq_pscan |
| KLF16    | uniq_pscan |
| PLAG1    | uniq_pscan |
| CENPB    | uniq_pscan |
| CTCF     | uniq_pscan |
| SP3      | uniq_pscan |
| HES1     | uniq_pscan |
| ZBTB7B   | uniq_pscan |
| KLF14    | uniq_pscan |
| ZBTB7C   | uniq_pscan |
| MX11     | uniq_pscan |
| GCM2     | uniq_pscan |
| RREB1    | uniq_pscan |
| NFKB2    | uniq_pscan |
| GMEB1    | uniq_pscan |
| HES7     | uniq_pscan |
| GCM1     | uniq_pscan |
| EWSR1-F1 | uniq_pscan |
| NFYB     | uniq_pscan |
| KLF1     | uniq_pscan |
| THAP1    | uniq_pscan |
| PAX5     | uniq_pscan |
| MTF1     | uniq_pscan |
